# Supplementary material for: Characterization of TSET, an ancient and widespread membrane trafficking complex
Source: eLife. 2014 May 27;3:e02866. doi: 10.7554/eLife.02866 (PMC4031984; doi:10.7554/eLife.02866)
Supplement: Figure 1—source data 1. — DOI: http://dx.doi.org/10.7554/eLife.02866.004 [file elife-02866-fig1-data1.xlsx]

## Sheet: Arabidopsis thaliana
Result no:	pdb info	Prob	E Value	P Value	Score	cols	thstt	thend	GenInfo number	Accession	Name	Repeats	Amino acids	ID
1	1w63_A	100	0	0	423	478	11	512	gi|79319515|ref	NP_001031156.1	AP-3 complex subunit delta [Arabidopsis thaliana]	6	869	AP-3 δ
1	1w63_A	100	0	0	681.6	590	10	599	gi|334183441|ref	NP_001185270.1	AP-1 complex subunit gamma-2 [Arabidopsis thaliana]	10	898	AP-1 γ
1	1w63_A	100	0	0	677.6	587	10	596	gi|15221613|ref	NP_173802.1	AP-1 complex subunit gamma-1 [Arabidopsis thaliana]	11	876	AP-1 γ
1	1w63_A	100	2.9e-39	1.09301e-43	297.9	260	11	279	gi|42562285|ref	NP_173805.2	armadillo/beta-catenin-like repeat-containing protein [Arabidopsis thaliana]	6	876	AP-1 γ
1	1w63_A	100	0	0	574.6	555	11	578	gi|30692596|ref	NP_174454.2	AP-4 complex subunit epsilon [Arabidopsis thaliana]	6	938	AP-4 ε
1	1w63_A	100	0	0	423	478	11	512	gi|15221961|ref	NP_175308.1	AP-3 complex subunit delta [Arabidopsis thaliana]	6	869	AP-3 δ
1	1w63_A	100	0	0	681.6	590	10	599	gi|145336886|ref	NP_176215.2	AP-1 complex subunit gamma-2 [Arabidopsis thaliana]	11	862	AP-1 γ
1	1w63_A	100	0	0	677.6	587	10	596	gi|30688616|ref	NP_849701.1	AP-1 complex subunit gamma-1 [Arabidopsis thaliana]	10	874	AP-1 γ
1	1w63_A	100	0	0	423	478	11	512	gi|30694404|ref	NP_849785.1	AP-3 complex subunit delta [Arabidopsis thaliana]	6	869	AP-3 δ
1	2vgl_A	100	8.4e-37	3.20001e-41	313.3	428	38	511	gi|334187063|ref	NP_001190880.1	coatomer subunit beta-1 [Arabidopsis thaliana]	7	948	β-COP
1	2vgl_A	100	8.4e-37	3.20001e-41	313.3	428	38	511	gi|334187061|ref	NP_194876.2	coatomer subunit beta-1 [Arabidopsis thaliana]	7	948	β-COP
1	2vgl_A	100	4.5e-37	1.70006e-41	315.3	428	38	511	gi|30689050|ref	NP_194877.2	coatomer subunit beta-2 [Arabidopsis thaliana]	7	948	β-COP
1	2vgl_A	100	0	0	814.1	601	8	617	gi|15242963|ref	NP_197669.1	AP-2 complex subunit alpha-1 [Arabidopsis thaliana]	9	1012	AP-2 α
1	2vgl_A	100	0	0	813.8	601	8	617	gi|15242964|ref	NP_197670.1	AP-2 complex subunit alpha-2 [Arabidopsis thaliana]	9	1013	AP-2 α
1	2vgl_A	100	0	0	814.1	601	8	617	gi|30688634|ref	NP_851057.1	AP-2 complex subunit alpha-1 [Arabidopsis thaliana]	9	1012	AP-2 α
1	2vgl_A	100	0	0	814.1	601	8	617	gi|30688640|ref	NP_851058.1	AP-2 complex subunit alpha-1 [Arabidopsis thaliana]	8	1012	AP-2 α
1	2vgl_B	100	0	0	644	572	10	586	gi|334187619|ref	NP_001190290.1	beta-adaptin-like protein A [Arabidopsis thaliana]	6	850	AP-4 β4
1	2vgl_B	100	0	0	824.2	583	2	586	gi|334186438|ref	NP_001190701.1	beta-adaptin-like protein B [Arabidopsis thaliana]	8	916	AP-1/2 β1/2
1	2vgl_B	100	0	0	836.3	583	2	586	gi|15233354|ref	NP_192877.1	beta-adaptin-like protein B [Arabidopsis thaliana]	8	894	AP-1/2 β1/2
1	2vgl_B	100	0	0	838	583	2	586	gi|15236506|ref	NP_194077.1	beta-adaptin-like protein C [Arabidopsis thaliana]	7	893	AP-1/2 β1/2
1	2vgl_B	100	0	0	644.4	572	10	586	gi|15239071|ref	NP_196710.1	beta-adaptin-like protein A [Arabidopsis thaliana]	6	841	AP-4 β4
1	2vgl_B	100	0	0	397.9	511	2	532	gi|240255649|ref	NP_974443.4	AP3-complex subunit beta-A [Arabidopsis thaliana]	7	1115	AP-3 β3
1	2vgl_B	99.9	9.3e-32	3.5e-36	272.1	404	112	532	gi|18410287|ref	NP_567022.1	AP3-complex subunit beta-A [Arabidopsis thaliana]	6	987	AP-3 β3
1	2vgl_B	98.9	3.5e-13	1.3e-17	132.5	367	56	436	gi|18379279|ref	NP_565275.1	uncharacterized protein [Arabidopsis thaliana]	6	743	VAC14
1	2vgl_B	98.9	2.9e-13	1.1e-17	133.2	371	56	436	gi|42570643|ref	NP_973395.1	uncharacterized protein [Arabidopsis thaliana]	6	744	VAC14
1	1w63_A	91	0.029	1.1e-06	52.3	51	529	579	gi|22331098|ref	NP_188134.2	uncharacterized protein [Arabidopsis thaliana]	3	562	AP-5 ζ
1	2vgl_B	83.1	0.23	8.8e-06	51	173	16	189	gi|30678420|ref	NP_186827.2	TPLATE protein [Arabidopsis thaliana]	4	1176	TPLATE
2	1gyu_A	33	12	0.00045	25.6	55	24	78	gi|22327389|ref	NP_680352.1	uncharacterized protein [Arabidopsis thaliana]	4	127
3	2vgl_B	100	1.19951e-42	0	347.6	523	9	551	gi|42567389|ref	NP_195171.2	coatomer subunit gamma [Arabidopsis thaliana]	9	886	γ-COP
3	2vgl_B	89.6	0.051	1.9e-06	55.7	147	42	188	gi|240256049|ref	NP_194085.4	NUC173 domain-containing protein [Arabidopsis thaliana]	4	1131
3	1kyf_A	78.9	0.43	1.6e-05	31.1	38	207	244	gi|15226705|ref	NP_179216.1	coatomer gamma subunit appendage domain-containing protein [Arabidopsis thaliana]	2	69	γ-COP fragment
3	1kyf_A	75.2	0.66	2.5e-05	31.2	38	207	244	gi|334184253|ref	NP_001189534.1	coatomer gamma subunit appendage domain-containing protein [Arabidopsis thaliana]	2	83	γ-COP fragment
3	2vgl_B	28.2	16	0.00062	36.8	16	443	458	gi|42569848|ref	NP_181714.3	uncharacterized protein [Arabidopsis thaliana]	2	1025
4	2vgl_B	89.2	0.059	2.2e-06	57.2	356	216	579	gi|186530154|ref	NP_001119389.1	sister chromatid cohesion protein PDS5 [Arabidopsis thaliana]	3	1606
4	2vgl_B	89.2	0.058	2.2e-06	57.2	356	216	579	gi|145358971|ref	NP_199580.3	sister chromatid cohesion protein PDS5 [Arabidopsis thaliana]	3	1605
4	2vgl_B	89.1	0.059	2.2e-06	57.2	356	216	579	gi|186530158|ref	NP_001119390.1	sister chromatid cohesion protein PDS5 [Arabidopsis thaliana]	3	1607
4	1w63_A	65.8	1.5	5.7e-05	43.9	65	146	210	gi|18407498|ref	NP_566119.1	cohesin complex subunit SA-1/2 [Arabidopsis thaliana]	2	1098
5	1w63_A	73.3	0.8	3e-05	47	90	118	207	gi|145339600|ref	NP_191265.2	condensin complex subunit 1 [Arabidopsis thaliana]	6	1396
5	1w63_A	73.1	0.81	3.1e-05	47	90	118	207	gi|334186044|ref	NP_001190114.1	condensin complex subunit 1 [Arabidopsis thaliana]	6	1415
5	2vgl_B	21.7	26	0.00099	35.2	30	444	473	gi|186525992|ref	NP_001031947.2	uncharacterized protein [Arabidopsis thaliana]	2	983
5	2vgl_B	21.7	26	0.00099	35.2	30	444	473	gi|186525996|ref	NP_001031948.2	uncharacterized protein [Arabidopsis thaliana]	2	983
5	2vgl_B	21.7	26	0.00099	35.2	30	444	473	gi|334187962|ref	NP_001190405.1	uncharacterized protein [Arabidopsis thaliana]	2	983
5	2vgl_B	21.7	26	0.00099	35.2	30	444	473	gi|186525988|ref	NP_198037.3	uncharacterized protein [Arabidopsis thaliana]	2	983
6	1w63_A	32.3	13	0.00048	25.5	9	481	489	gi|186511335|ref	NP_001118889.1	uncharacterized protein [Arabidopsis thaliana]	3	67
6	3zy7_A	27.4	17	0.00066	23.6	18	43	60	gi|15229280|ref	NP_189927.1	uncharacterized protein [Arabidopsis thaliana]	3	122
7	2vgl_A	57.5	2.7	0.0001	42.9	203	388	611	gi|15220892|ref	NP_178208.1	pre-mRNA-splicing factor CWC22 [Arabidopsis thaliana]	3	900
7	2vgl_A	10.6	78	0.0029	32.8	22	566	589	gi|334185484|ref	NP_188621.2	uncharacterized protein [Arabidopsis thaliana]	2	1090	AP-5 β5
9	2vgl_B	28.9	16	0.00059	36.4	101	82	189	gi|18399399|ref	NP_565477.1	26S proteasome regulatory subunit N1 [Arabidopsis thaliana]	6
10	2vgl_B	97.9	8.3e-09	3.1e-13	106.8	298	91	405	gi|79316548|ref	NP_001030954.1	cullin-associated NEDD8-dissociated protein 1 [Arabidopsis thaliana]	6
10	2vgl_B	97.9	8.3e-09	3.1e-13	106.8	298	91	405	gi|22325430|ref	NP_178360.2	cullin-associated NEDD8-dissociated protein 1 [Arabidopsis thaliana]	6
10	2vgl_B	81	0.33	1.2e-05	41.2	94	86	191	gi|18412406|ref	NP_567129.1	armadillo/beta-catenin-like repeat-containing protein [Arabidopsis thaliana]	3
10	1iu1_A	43	6.6	0.00025	29.5	42	27	78	gi|18405162|ref	NP_030525.1	glycoprotein-like protein [Arabidopsis thaliana]	4

## Sheet: Selaginella moellendorffii
Result no:	pdb info	Prob	E Value	P Value	Score	cols	thstt	thend	GenInfo number	Accession	Name	Repeats	Amino acids	ID
1	2vgl_A	100	0	0	401.5	532	11	589	gi|302753964|ref	XP_002960406.1	hypothetical protein SELMODRAFT_867 [Selaginella moellendorffii]	6	612	AP-3 δ
1	2vgl_A	100	0	0	772.3	600	8	616	gi|302763929|ref	XP_002965386.1	hypothetical protein SELMODRAFT_230624 [Selaginella moellendorffii]	8	997	AP-2 α
1	1w63_A	100	0	0	649.6	580	15	594	gi|302765415|ref	XP_002966128.1	hypothetical protein SELMODRAFT_168054 [Selaginella moellendorffii]	12	846	AP-1 γ
1	2vgl_A	100	0	0	400.8	534	10	590	gi|302767788|ref	XP_002967314.1	hypothetical protein SELMODRAFT_87265 [Selaginella moellendorffii]	6	880	AP-3 δ
1	2vgl_A	100	0	0	563.1	562	9	594	gi|302771870|ref	XP_002969353.1	hypothetical protein SELMODRAFT_170737 [Selaginella moellendorffii]	6	992	AP-4 ε
1	2vgl_A	100	0	0	561.3	562	9	594	gi|302774535|ref	XP_002970684.1	hypothetical protein SELMODRAFT_267442 [Selaginella moellendorffii]	6	910	AP-4 ε
1	2vgl_A	100	0	0	772.5	600	8	616	gi|302790932|ref	XP_002977233.1	hypothetical protein SELMODRAFT_443442 [Selaginella moellendorffii]	8	958	AP-2 α
1	2vgl_A	100	0	0	541.4	543	9	589	gi|302794751|ref	XP_002979139.1	hypothetical protein SELMODRAFT_233268 [Selaginella moellendorffii]	7	861	AP-2 α
1	1w63_A	100	0	0	649.8	580	15	594	gi|302800832|ref	XP_002982173.1	hypothetical protein SELMODRAFT_154964 [Selaginella moellendorffii]	12	848	AP-1 γ
1	2vgl_B	100	0	0	403.1	499	18	535	gi|302802865|ref	XP_002983186.1	hypothetical protein SELMODRAFT_740 [Selaginella moellendorffii]	6	602	AP-3 β3
1	2vgl_B	100	0	0	402.2	508	2	531	gi|302802869|ref	XP_002983188.1	hypothetical protein SELMODRAFT_118138 [Selaginella moellendorffii]	6	906	AP-3 β3
1	2vgl_B	100	0	0	709.2	570	3	587	gi|302810350|ref	XP_002986866.1	hypothetical protein SELMODRAFT_269184 [Selaginella moellendorffii]	9	871	AP-1 β1
1	2vgl_B	100	0	0	401.6	508	2	531	gi|302812036|ref	XP_002987706.1	hypothetical protein SELMODRAFT_126458 [Selaginella moellendorffii]	6	908	AP-3 β3
1	2vgl_B	100	0	0	693.9	570	3	587	gi|302816740|ref	XP_002990048.1	hypothetical protein SELMODRAFT_269606 [Selaginella moellendorffii]	9	874	AP-1/2 β1/2
1	2vgl_B	100	0	0	550.2	568	9	586	gi|302819011|ref	XP_002991177.1	hypothetical protein SELMODRAFT_269763 [Selaginella moellendorffii]	7	810	AP-4 β4
1	2vgl_B	100	0	0	558.3	569	9	586	gi|302819132|ref	XP_002991237.1	hypothetical protein SELMODRAFT_236236 [Selaginella moellendorffii]	7	809	AP-4 β4
1	2vgl_B	99.9	1.2e-28	4.1e-33	224.2	184	2	190	gi|302802861|ref	XP_002983184.1	hypothetical protein SELMODRAFT_422500 [Selaginella moellendorffii]	6	433	AP-3 β3 fragment
1	2vgl_A	95.8	0.00019	6.7e-09	59	65	522	588	gi|302825955|ref	XP_002994542.1	hypothetical protein SELMODRAFT_432456 [Selaginella moellendorffii]	3	159	AP-3 β3 fragment
1	1w63_A	94.8	0.0016	5.4e-08	60.7	98	337	434	gi|302817648|ref	XP_002990499.1	hypothetical protein SELMODRAFT_131885 [Selaginella moellendorffii]	6	464
1	1w63_A	94.3	0.003	1e-07	57.2	74	337	410	gi|302804007|ref	XP_002983756.1	hypothetical protein SELMODRAFT_33372 [Selaginella moellendorffii]	6	367
1	2vgl_B	84.1	0.21	7.4e-06	49.4	217	46	267	gi|302776916|ref	XP_002971583.1	hypothetical protein SELMODRAFT_412413 [Selaginella moellendorffii]	5	922
1	2vgl_B	83.5	0.24	8.3e-06	50.2	135	15	150	gi|302808125|ref	XP_002985757.1	hypothetical protein SELMODRAFT_122869 [Selaginella moellendorffii]	3	1149	TPLATE
1	2vgl_B	83.4	0.24	8.4e-06	50.1	135	15	150	gi|302785361|ref	XP_002974452.1	hypothetical protein SELMODRAFT_267752 [Selaginella moellendorffii]	3	1149	TPLATE
1	2g30_A	52.3	4	0.00014	33.7	39	39	79	gi|302802857|ref	XP_002983182.1	hypothetical protein SELMODRAFT_422496 [Selaginella moellendorffii]	3	252	AP-3 β3
2	2vgl_B	100	3.5e-36	1.2e-40	298.4	440	7	467	gi|302816011|ref	XP_002989685.1	hypothetical protein SELMODRAFT_160340 [Selaginella moellendorffii]	7	960	β-COP
2	1w63_A	55.1	3.4	0.00012	31	57	356	415	gi|302772747|ref	XP_002969791.1	hypothetical protein SELMODRAFT_410758 [Selaginella moellendorffii]	3	100
3	1w63_A	42.6	7.3	0.00026	36.8	48	528	575	gi|302793600|ref	XP_002978565.1	hypothetical protein SELMODRAFT_108875 [Selaginella moellendorffii]	3	AP5Z; 548	AP-5 ζ
3	1w63_A	41.3	7.9	0.00028	36.6	48	528	575	gi|302774142|ref	XP_002970488.1	hypothetical protein SELMODRAFT_171350 [Selaginella moellendorffii]	3	AP5Z; 548	AP-5 ζ
3	1gyu_A	19.2	35	0.0012	26.3	62	67	132	gi|302759739|ref	XP_002963292.1	hypothetical protein SELMODRAFT_405064 [Selaginella moellendorffii]	2	297
4	2vgl_B	100	2.2e-38	7.59504e-43	311.6	505	21	546	gi|302803747|ref	XP_002983626.1	hypothetical protein SELMODRAFT_268757 [Selaginella moellendorffii]	9	886	γ-COP
4	1w63_A	89.4	0.059	2.1e-06	57.4	209	118	350	gi|302802530|ref	XP_002983019.1	hypothetical protein SELMODRAFT_445396 [Selaginella moellendorffii]	6	1675
4	1w63_A	71.7	1	3.5e-05	45.4	100	390	494	gi|302792877|ref	XP_002978204.1	hypothetical protein SELMODRAFT_108060 [Selaginella moellendorffii]	5	954
5	1w63_A	66.9	1.5	5.3e-05	44.1	100	390	494	gi|302765871|ref	XP_002966356.1	hypothetical protein SELMODRAFT_86139 [Selaginella moellendorffii]	5	954
5	1w63_A	52.9	3.9	0.00014	37.2	45	130	174	gi|302805198|ref	XP_002984350.1	hypothetical protein SELMODRAFT_423529 [Selaginella moellendorffii]	3	401
8	1w63_A	98.1	3.2e-09	1.1e-13	103.8	348	71	440	gi|302780914|ref	XP_002972231.1	hypothetical protein SELMODRAFT_172660 [Selaginella moellendorffii]	6	723	VAC14
8	1w63_A	98.1	3.5e-09	1.2e-13	103.3	348	71	440	gi|302804783|ref	XP_002984143.1	hypothetical protein SELMODRAFT_180770 [Selaginella moellendorffii]	6	708	VAC14
8	1w63_A	84.4	0.2	7.1e-06	49.9	181	7	206	gi|302753688|ref	XP_002960268.1	hypothetical protein SELMODRAFT_75276 [Selaginella moellendorffii]	4	874
9	2vgl_B	99.3	9.6e-16	3.4e-20	144.2	502	14	529	gi|302784122|ref	XP_002973833.1	hypothetical protein SELMODRAFT_232183 [Selaginella moellendorffii]	6	580
9	2vgl_B	99.3	9.6e-16	3.4e-20	144.2	502	14	529	gi|302803608|ref	XP_002983557.1	hypothetical protein SELMODRAFT_268734 [Selaginella moellendorffii]	6	580
9	1w63_A	80.9	0.36	1.3e-05	48.2	154	7	171	gi|302768046|ref	XP_002967443.1	hypothetical protein SELMODRAFT_87654 [Selaginella moellendorffii]	4	890
10	2vgl_B	99	6.5e-14	2.3e-18	131.9	494	14	523	gi|302813208|ref	XP_002988290.1	hypothetical protein SELMODRAFT_447252 [Selaginella moellendorffii]	6	584
10	1w63_A	64.5	1.8	6.3e-05	43.2	82	111	194	gi|302782055|ref	XP_002972801.1	hypothetical protein SELMODRAFT_228162 [Selaginella moellendorffii]	4	887

## Sheet: Physcomitrella patens
Result no:	pdb info	Prob	E Value	P Value	Score	cols	thstt	thend	GenInfo number	Accession	Name	Repeat	Amino acids	ID
1	2vgl_A	100	0	0	779.8	599	10	617	gi|168008992|ref	XP_001757190.1	predicted protein [Physcomitrella patens subsp. patens]	9	1017	AP-2 α
1	1w63_A	100	0	0	624.1	591	8	598	gi|168009052|ref	XP_001757220.1	predicted protein [Physcomitrella patens subsp. patens]	10	885	AP-1 γ
1	2vgl_B	100	0	0	723.6	584	3	588	gi|168016117|ref	XP_001760596.1	predicted protein [Physcomitrella patens subsp. patens]	12	900	AP-2 β2
1	2vgl_A	100	0	0	553.4	570	9	597	gi|168017112|ref	XP_001761092.1	predicted protein [Physcomitrella patens subsp. patens]	6	944	AP-4 ε
1	2vgl_B	100	0	0	423.3	549	3	575	gi|168022360|ref	XP_001763708.1	predicted protein [Physcomitrella patens subsp. patens]	7	1084	AP-3 β3
1	2vgl_A	100	0	0	540.2	568	9	597	gi|168024496|ref	XP_001764772.1	predicted protein [Physcomitrella patens subsp. patens]	6	969	AP-4 ε
1	2vgl_A	100	0	0	596.8	565	16	604	gi|168029441|ref	XP_001767234.1	predicted protein [Physcomitrella patens subsp. patens]	11	758	AP-1 γ
1	2vgl_B	100	0	0	554.7	571	9	584	gi|168036959|ref	XP_001770973.1	predicted protein [Physcomitrella patens subsp. patens]	6	826	AP-4 β4
1	1w63_A	100	0	0	607.5	583	13	597	gi|168039675|ref	XP_001772322.1	predicted protein [Physcomitrella patens subsp. patens]	10	849	AP-1 γ
1	2vgl_A	100	0	0	750.2	600	8	616	gi|168043259|ref	XP_001774103.1	predicted protein [Physcomitrella patens subsp. patens]	8	1009	AP-2 α
1	2vgl_A	100	0	0	629.7	572	12	608	gi|168048749|ref	XP_001776828.1	predicted protein [Physcomitrella patens subsp. patens]	10	873	AP-1 γ
1	2vgl_A	100	0	0	389.7	493	11	551	gi|168051011|ref	XP_001777950.1	predicted protein [Physcomitrella patens subsp. patens]	6	565	AP-3 δ
1	2vgl_B	100	0	0	723.6	582	3	586	gi|168057121|ref	XP_001780565.1	predicted protein [Physcomitrella patens subsp. patens]	10	900	AP-1 β1
1	2vgl_B	100	0	0	727.8	582	3	586	gi|168061445|ref	XP_001782699.1	predicted protein [Physcomitrella patens subsp. patens]	12	899	AP-1 β1
1	2vgl_A	100	0	0	759.4	601	8	617	gi|168067632|ref	XP_001785715.1	predicted protein [Physcomitrella patens subsp. patens]	7	1055	AP-2 α
1	2vgl_B	92.3	0.016	5.5e-07	58.8	134	15	149	gi|168000759|ref	XP_001753083.1	predicted protein [Physcomitrella patens subsp. patens]	6	1156	TPLATE
1	1w63_A	86.5	0.13	4.6e-06	53.2	71	141	211	gi|168001222|ref	XP_001753314.1	predicted protein [Physcomitrella patens subsp. patens]	3	1239
1	2vgl_B	85.5	0.16	5.7e-06	51.4	133	16	149	gi|168023481|ref	XP_001764266.1	predicted protein [Physcomitrella patens subsp. patens]	4	1140	TPLATE
1	2vgl_B	85.2	0.17	6.1e-06	51.3	133	16	149	gi|168017842|ref	XP_001761456.1	predicted protein [Physcomitrella patens subsp. patens]	3	1171	TPLATE
2	2vgl_B	99.9	5.2e-33	1.8e-37	275.5	426	15	461	gi|168015790|ref	XP_001760433.1	predicted protein [Physcomitrella patens subsp. patens]	6	953	β-COP
2	2vgl_B	99.9	1.9e-31	6.5e-36	264.7	423	15	459	gi|168042714|ref	XP_001773832.1	predicted protein [Physcomitrella patens subsp. patens]	6	961	β-COP
2	2vgl_B	99.9	3.3e-31	1.2e-35	262.7	421	15	457	gi|168059347|ref	XP_001781664.1	predicted protein [Physcomitrella patens subsp. patens]	6	956	β-COP
3	2vgl_B	89.8	0.05	1.8e-06	55.9	115	98	219	gi|168046828|ref	XP_001775874.1	chromosome condensation complex protein [Physcomitrella patens subsp. patens]	6	956	β-COP
3	2vgl_B	88.9	0.069	2.4e-06	54.8	91	294	384	gi|168062237|ref	XP_001783088.1	chromosome condensation complex protein [Physcomitrella patens subsp. patens]	6	1298
3	1iu1_A	10.2	88	0.0031	26.3	38	72	112	gi|168038507|ref	XP_001771742.1	predicted protein [Physcomitrella patens subsp. patens]	2	613
4	2vgl_B	100	3.4e-39	1.20512e-43	315.6	492	33	545	gi|168004211|ref	XP_001754805.1	predicted protein [Physcomitrella patens subsp. patens]	9	843	γ-COP
4	2vgl_B	100	4.2e-38	1.49939e-42	309.7	497	27	544	gi|168015439|ref	XP_001760258.1	predicted protein [Physcomitrella patens subsp. patens]	9	890	γ-COP
4	1w63_A	100	6.3e-39	2.20004e-43	319.7	523	28	595	gi|168056664|ref	XP_001780339.1	predicted protein [Physcomitrella patens subsp. patens]	9	800	γ-COP
4	1w63_A	99.6	3.2e-20	1.1e-24	183.2	366	28	470	gi|168019437|ref	XP_001762251.1	predicted protein [Physcomitrella patens subsp. patens]	6	800	γ-COP
4	2vgl_B	54.2	3.6	0.00013	36.5	53	94	146	gi|168030482|ref	XP_001767752.1	predicted protein [Physcomitrella patens subsp. patens]	3	366
4	1kyf_A	39.5	8.8	0.00031	25.2	11	127	137	gi|168061064|ref	XP_001782511.1	predicted protein [Physcomitrella patens subsp. patens]	2	64
5	2e9g_A	21.2	29	0.001	23.7	16	55	70	gi|168021861|ref	XP_001763459.1	predicted protein [Physcomitrella patens subsp. patens]	2	150
6	1gyu_A	41	8	0.00028	26.4	21	95	115	gi|168016159|ref	XP_001760617.1	predicted protein [Physcomitrella patens subsp. patens]	2	119
6	1kyf_A	16.4	44	0.0015	24.2	43	158	216	gi|168018394|ref	XP_001761731.1	predicted protein [Physcomitrella patens subsp. patens]	2	125
6	3hs8_A	14.8	52	0.0018	26.6	10	235	244	gi|168033418|ref	XP_001769212.1	predicted protein [Physcomitrella patens subsp. patens]	2	218
7	1w63_A	57.2	3	0.0001	43.1	74	156	229	gi|168032833|ref	XP_001768922.1	predicted protein [Physcomitrella patens subsp. patens]	2	1252
7	3zy7_A	49.7	4.8	0.00017	31.7	58	31	98	gi|168042633|ref	XP_001773792.1	predicted protein [Physcomitrella patens subsp. patens]	3	418
7	2vgl_B	30.1	16	0.00055	35.8	100	83	189	gi|168065387|ref	XP_001784634.1	predicted protein [Physcomitrella patens subsp. patens]	2	873
8	2vgl_A	76.8	0.6	2.1e-05	46	116	135	270	gi|168033412|ref	XP_001769209.1	predicted protein [Physcomitrella patens subsp. patens]	2	704
8	2e9g_A	26.7	20	0.00069	24.4	49	62	118	gi|168033002|ref	XP_001769006.1	predicted protein [Physcomitrella patens subsp. patens]	4	143
9	1w63_A	98.4	1.6e-10	5.7e-15	112.7	397	68	492	gi|168035384|ref	XP_001770190.1	predicted protein [Physcomitrella patens subsp. patens]	6	712	VAC14
9	2vgl_B	92.5	0.014	4.8e-07	57.4	140	293	435	gi|168009844|ref	XP_001757615.1	predicted protein [Physcomitrella patens subsp. patens]	4	853
9	3zy7_A	40.3	8.3	0.00029	23.2	22	89	110	gi|168006440|ref	XP_001755917.1	predicted protein [Physcomitrella patens subsp. patens]	4	65
10	2vgl_B	99.3	1.1e-15	4e-20	143.9	389	14	417	gi|168034449|ref	XP_001769725.1	predicted protein [Physcomitrella patens subsp. patens]	6	589
10	2vgl_B	99.2	2.9e-15	1e-19	141.1	391	14	417	gi|168046709|ref	XP_001775815.1	predicted protein [Physcomitrella patens subsp. patens]	6	589
10	2vgl_B	99.2	8.3e-15	2.9e-19	138.1	490	14	520	gi|168049192|ref	XP_001777048.1	predicted protein [Physcomitrella patens subsp. patens]	6	589
10	1w63_A	36.8	10	0.00036	34.8	117	86	205	gi|168017319|ref	XP_001761195.1	predicted protein [Physcomitrella patens subsp. patens]	3	440

## Sheet: Vitis vinifera
Result no:	pdb info	Prob	E Value	P Value	Score	cols	thstt	thend	GenInfo number	Accession	Name	Repeats	Amino acids	ID
1	1w63_A	100	0	0	634	591	10	600	gi|225424713|ref	XP_002265190.1	PREDICTED: hypothetical protein [Vitis vinifera]	10	878	AP-1 γ
1	2vgl_A	100	0	0	563.2	567	7	598	gi|225427619|ref	XP_002269504.1	PREDICTED: hypothetical protein [Vitis vinifera]	6	1489	AP-4 ε
1	2vgl_A	100	0	0	772.8	600	8	616	gi|225436363|ref	XP_002270388.1	PREDICTED: hypothetical protein [Vitis vinifera]	8	1015	AP-2 α
1	2vgl_A	100	5.60519e-45	0	368	533	10	589	gi|225455986|ref	XP_002276686.1	PREDICTED: hypothetical protein [Vitis vinifera]	6	914	AP-3 δ
1	2vgl_B	100	0	0	418.7	510	3	532	gi|225449487|ref	XP_002278568.1	PREDICTED: hypothetical protein [Vitis vinifera]	6	1140	AP-3 β3
1	2vgl_B	100	0	0	738.9	582	3	586	gi|225426194|ref	XP_002279641.1	PREDICTED: hypothetical protein [Vitis vinifera]	11	903; APB	AP-2 β2
1	2vgl_B	100	0	0	542.7	572	10	587	gi|225430033|ref	XP_002284239.1	PREDICTED: hypothetical protein [Vitis vinifera]	6	844	AP-1/2 β1/2
1	1w63_A	87.9	0.093	3.3e-06	54	172	36	208	gi|225452161|ref	XP_002263932.1	PREDICTED: hypothetical protein [Vitis vinifera]	6	1179	TPLATE
1	2vgl_A	79.3	0.44	1.6e-05	45.8	53	538	590	gi|225461058|ref	XP_002281589.1	PREDICTED: hypothetical protein [Vitis vinifera]	3	569	AP-5 ζ
1	1kyf_A	63.7	1.9	6.7e-05	32.3	22	178	201	gi|225449730|ref	XP_002267419.1	PREDICTED: hypothetical protein [Vitis vinifera]	2	144
2	2vgl_B	100	1.1e-35	3.8e-40	294.6	436	7	463	gi|225443308|ref	XP_002275226.1	PREDICTED: hypothetical protein [Vitis vinifera]	6	949	β-COP
2	2vgl_B	100	1.2e-36	4.19997e-41	301.3	436	5	461	gi|225429750|ref	XP_002282410.1	PREDICTED: hypothetical protein [Vitis vinifera]	6	948	β-COP
2	2vgl_B	96.4	3.4e-05	1.2e-09	76.5	219	118	349	gi|225439556|ref	XP_002264741.1	PREDICTED: hypothetical protein [Vitis vinifera]	6	1007	integrator and adaptin like
2	2vgl_B	89.6	0.055	1.9e-06	55.8	144	61	210	gi|225441270|ref	XP_002267738.1	PREDICTED: hypothetical protein [Vitis vinifera]	6	1367
2	3zy7_A	40.1	8.4	0.0003	28.9	16	53	68	gi|225428618|ref	XP_002284765.1	PREDICTED: hypothetical protein [Vitis vinifera]	4	294
4	1w63_A	100	1.9e-37	6.60012e-42	308.9	505	29	578	gi|225428505|ref	XP_002284401.1	PREDICTED: hypothetical protein [Vitis vinifera]	9	887	γ-COP
4	1kyf_A	20.4	31	0.0011	26.6	7	144	150	gi|225436210|ref	XP_002268577.1	PREDICTED: hypothetical protein [Vitis vinifera]	2	191
5	2vgl_A	44	6.7	0.00023	40.7	174	82	271	gi|225451681|ref	XP_002276495.1	PREDICTED: hypothetical protein [Vitis vinifera]	2	1166;
6	1w63_A	71.2	1	3.7e-05	46.9	97	111	207	gi|225432246|ref	XP_002275652.1	PREDICTED: hypothetical protein [Vitis vinifera]	6	1345
6	1w63_A	38.2	9.5	0.00033	39.1	59	151	209	gi|225436829|ref	XP_002270509.1	PREDICTED: hypothetical protein [Vitis vinifera]	3	1143
6	1gyu_A	24.2	23	0.00082	27	30	49	79	gi|225442943|ref	XP_002266165.1	PREDICTED: similar to chloroplast post-illumination chlorophyll fluorescence increase protein isoform 1 [Vitis vinifera]	3	282
6	1gyu_A	24.2	23	0.00082	27	30	49	79	gi|225442945|ref	XP_002266207.1	PREDICTED: similar to chloroplast post-illumination chlorophyll fluorescence increase protein isoform 2 [Vitis vinifera]	3	282
9	2vgl_B	99.4	1.4e-16	4.9e-21	150.1	494	14	523	gi|225455902|ref	XP_002276180.1	PREDICTED: hypothetical protein [Vitis vinifera]	6	587
9	1w63_A	98.2	9.8e-10	3.4e-14	107.5	349	69	440	gi|225424372|ref	XP_002284995.1	PREDICTED: hypothetical protein [Vitis vinifera]	6	727	VAC14
10	2vgl_B	99.2	7.4e-15	2.6e-19	139.3	492	13	521	gi|225423927|ref	XP_002282096.1	PREDICTED: hypothetical protein [Vitis vinifera]	6	587
10	2vgl_B	95	0.0011	3.8e-08	58.4	144	82	270	gi|225452496|ref	XP_002279099.1	PREDICTED: hypothetical protein [Vitis vinifera]	6	330

## Sheet: Volvox carteri
Result no:	pdb info	Prob	E Value	P Value	Score	cols	thstt	thend	GenInfo number	Accession	Name	Repeats	Amino acids	ID
1	2vgl_A	100	0	0	526.7	558	10	591	gi|302830860|ref	XP_002946996.1	hypothetical protein VOLCADRAFT_87158 [Volvox carteri f. nagariensis]	6	1118	AP-4 ε
1	2vgl_B	100	0	0	536	571	9	584	gi|302831003|ref	XP_002947067.1	hypothetical protein VOLCADRAFT_56821 [Volvox carteri f. nagariensis]	7	847	AP-4 β4
1	2vgl_A	100	0	0	663	597	14	617	gi|302833281|ref	XP_002948204.1	hypothetical protein VOLCADRAFT_120602 [Volvox carteri f. nagariensis]	8	1117	AP-2 α
1	2vgl_A	100	0	0	582.7	570	13	608	gi|302835912|ref	XP_002949517.1	hypothetical protein VOLCADRAFT_101862 [Volvox carteri f. nagariensis]	10	801	AP-1 γ
1	2vgl_B	100	0	0	719.6	585	1	585	gi|302846785|ref	XP_002954928.1	hypothetical protein VOLCADRAFT_65427 [Volvox carteri f. nagariensis]	10	835	AP-1/2 β1/2
1	1w63_A	88.7	0.072	2.5e-06	56.7	126	120	263	gi|302837257|ref	XP_002950188.1	hypothetical protein VOLCADRAFT_104588 [Volvox carteri f. nagariensis]	6	1660
2	2vgl_B	99.9	2.1e-33	7.4e-38	278.9	430	12	461	gi|302850384|ref	XP_002956719.1	hypothetical protein VOLCADRAFT_67325 [Volvox carteri f. nagariensis]	6	973	β-COP
2	1w63_A	83.9	0.22	7.8e-06	53.5	123	83	206	gi|302832922|ref	XP_002948025.1	hypothetical protein VOLCADRAFT_103652 [Volvox carteri f. nagariensis]	3	1814	TPLATE
4	1w63_A	100	3e-34	1e-38	285.9	481	42	575	gi|302830478|ref	XP_002946805.1	hypothetical protein VOLCADRAFT_72994 [Volvox carteri f. nagariensis]	8	884	γ-COP
10	2vgl_B	99	2.2e-13	7.6e-18	128.3	496	14	526	gi|302846915|ref	XP_002954993.1	hypothetical protein VOLCADRAFT_83018 [Volvox carteri f. nagariensis]	6	584

## Sheet: Naegleria gruberi
Result no:	pdb info	Prob	E Value	P Value	Score	cols	thstt	thend	GenInfo number	Accession	Name	Repeats	Amino acids	ID
1	3hs8_A	100	5.60519e-45	0	316.3	226	42	273	gi|290970944|ref	XP_002668316.1	predicted protein [Naegleria gruberi]	5	317	AP-2 α fragment
1	2vgl_A	100	0	0	743.7	605	8	616	gi|290976531|ref	XP_002670993.1	predicted protein [Naegleria gruberi]	10	884	AP-2 α
1	2vgl_B	100	0	0	790.7	578	4	583	gi|290983650|ref	XP_002674541.1	adapter-related protein complex 1 beta 1 subunit [Naegleria gruberi]	10	914	AP-1 β1
1	2vgl_B	100	0	0	606.6	567	12	586	gi|290986406|ref	XP_002675915.1	predicted protein [Naegleria gruberi]	9	736	AP-4 β4
1	1w63_A	100	0	0	467.5	457	11	491	gi|290987391|ref	XP_002676406.1	predicted protein [Naegleria gruberi]	6	5121	AP-3 δ
1	2vgl_A	100	0	0	621.7	563	13	599	gi|290987746|ref	XP_002676583.1	predicted protein [Naegleria gruberi]	6	649	AP-4 ε
1	1w63_A	100	0	0	395.4	563	11	576	gi|290993160|ref	XP_002679201.1	predicted protein [Naegleria gruberi]	5	1055	AP-4 ε
1	1w63_A	100	0	0	594.8	579	10	592	gi|290995801|ref	XP_002680471.1	clathrin-adaptor gamma chain [Naegleria gruberi]	9	874	AP-1 γ
1	2vgl_B	100	0	0	498.1	516	2	532	gi|290995961|ref	XP_002680551.1	adaptor-related protein complex 3 protein beta subunit [Naegleria gruberi]	5	777	AP-3 β3
1	3hs8_A	99.9	5.1e-31	1.9e-35	211.3	156	116	273	gi|290971802|ref	XP_002668666.1	predicted protein [Naegleria gruberi]	3	163	AP-2 α fragment
1	2vgl_B	92.9	0.01	3.8e-07	60.8	246	17	264	gi|290984859|ref	XP_002675144.1	predicted protein [Naegleria gruberi]	3	1097	TPLATE
1	2vgl_B	80.4	0.36	1.3e-05	49	59	329	387	gi|290987718|ref	XP_002676569.1	predicted protein [Naegleria gruberi]	4	1020
1	2vgl_B	45.2	5.8	0.00022	39	109	158	267	gi|290989545|ref	XP_002677398.1	predicted protein [Naegleria gruberi]	2	780	TSAUCER
2	1w63_A	99.9	8.5e-31	3.2e-35	261	417	48	492	gi|290980950|ref	XP_002673194.1	coatomer protein complex, subunit beta 1-like protein [Naegleria gruberi]	8	1014	β-COP
2	1kyf_A	28.7	16	0.0006	28.5	24	130	153	gi|290976609|ref	XP_002671032.1	predicted protein [Naegleria gruberi]	2	250
3	2vgl_A	100	2.8e-37	9.99967e-42	315.1	512	43	604	gi|290974281|ref	XP_002669874.1	coatomer protein gamma 2-subunit [Naegleria gruberi]	7	895	γ-COP
3	1w63_A	88.6	0.07	2.6e-06	54.2	112	121	232	gi|290999497|ref	XP_002682316.1	condensin subunit SMC1 [Naegleria gruberi]	6	1228
3	2vgl_B	80.9	0.33	1.3e-05	44.9	172	87	268	gi|290977226|ref	XP_002671339.1	predicted protein [Naegleria gruberi]	6	444
5	2vgl_B	98	6.7e-09	2.5e-13	107	297	85	396	gi|290981832|ref	XP_002673635.1	predicted protein [Naegleria gruberi]	6	1165
6	2vgl_B	96.8	7e-06	2.6e-10	80.3	295	99	398	gi|290994428|ref	XP_002679834.1	vacuole 14 protein [Naegleria gruberi]	5	708	VAC14
6	1gyu_A	17.4	37	0.0014	27.8	39	93	131	gi|290997027|ref	XP_002681083.1	predicted protein [Naegleria gruberi]	2	526
9	2vgl_B	70.6	1	3.9e-05	47.1	185	53	251	gi|291000901|ref	XP_002683017.1	sister chromatid cohesion [Naegleria gruberi]	3	1388

## Sheet: Micromonas pusilla
Result no:	pdb info	Prob	E Value	P Value	Score	cols	thstt	thend	GenInfo number	Accession	Name	Repeats	Amino acids	ID
1	2vgl_B	100	0	0	654.5	576	2	582	gi|303274254|ref	XP_003056449.1	predicted protein [Micromonas pusilla CCMP1545]	7	904	AP-1/2 β1/2
1	2vgl_B	100	0	0	510	547	28	583	gi|303277587|ref	XP_003058087.1	predicted protein [Micromonas pusilla CCMP1545]	5	573	AP-4 β4
1	2vgl_A	100	0	0	605.1	579	9	614	gi|303282997|ref	XP_003060790.1	predicted protein [Micromonas pusilla CCMP1545]	10	895	AP-1 γ
1	2vgl_A	100	0	0	632.3	600	8	618	gi|303283352|ref	XP_003060967.1	predicted protein [Micromonas pusilla CCMP1545]	6	1107	AP-2 α
1	2vgl_A	100	0	0	471.3	427	8	454	gi|303283762|ref	XP_003061172.1	predicted protein [Micromonas pusilla CCMP1545]	6	438	AP-4 ε
1	2vgl_B	100	0	0	405	512	41	574	gi|303284217|ref	XP_003061399.1	predicted protein [Micromonas pusilla CCMP1545]	6	686	AP-3 β3
1	2vgl_A	100	0	0	427.9	533	11	590	gi|303288988|ref	XP_003063782.1	predicted protein [Micromonas pusilla CCMP1545]	6	914	AP-3 δ
1	1kyf_A	46	5.9	0.00021	27.3	19	12	30	gi|303282801|ref	XP_003060692.1	predicted protein [Micromonas pusilla CCMP1545]	2	85
2	1w63_A	99.9	9.3e-33	3.3e-37	277.5	425	37	493	gi|303276653|ref	XP_003057620.1	coatomer subunit beta [Micromonas pusilla CCMP1545]	7	964	β-COP
4	2vgl_B	100	3e-34	1e-38	282.5	486	26	532	gi|303273424|ref	XP_003056073.1	coatomer protein gamma-subunit [Micromonas pusilla CCMP1545]	8	893	γ-COP
4	2vgl_B	84.6	0.19	6.8e-06	52.4	128	96	229	gi|303274016|ref	XP_003056333.1	predicted protein [Micromonas pusilla CCMP1545]	5	1565
4	3hs8_A	48	5.3	0.00019	37.3	44	134	177	gi|303278870|ref	XP_003058728.1	predicted protein [Micromonas pusilla CCMP1545]	2	688
4	2vgl_A	41.2	7.9	0.00028	28.2	9	37	45	gi|303286547|ref	XP_003062563.1	predicted protein [Micromonas pusilla CCMP1545]	4	77
8	1w63_A	75.6	0.68	2.4e-05	48.9	91	120	210	gi|303275416|ref	XP_003057002.1	condensin complex component, non-smc subunit [Micromonas pusilla CCMP1545]	6	1534
10	2vgl_B	99	2.6e-13	8.9e-18	128	495	14	524	gi|303271319|ref	XP_003055021.1	protein phosphatase 2A regulatory subunit [Micromonas pusilla CCMP1545]	6	592

## Sheet: Dictyostelium purpureum
Result no:	pdb info	Prob	E Value	P Value	Score	cols	thstt	thend	GenInfo number	Accession	Name	Repeats	Amino acids	ID
1	2vgl_A	100	0	0	493.3	559	13	590	gi|330799966|ref	XP_003288011.1	hypothetical protein DICPUDRAFT_55169 [Dictyostelium purpureum]	6	987	AP-4 ε
1	2vgl_B	100	0	0	735.7	587	1	589	gi|330801124|ref	XP_003288580.1	hypothetical protein DICPUDRAFT_48016 [Dictyostelium purpureum]	9	898	AP-1/2 β1/2
1	2vgl_A	100	0	0	661.7	570	12	608	gi|330802457|ref	XP_003289233.1	clathrin-adaptor gamma chain Ap1g1 [Dictyostelium purpureum]	11	867	AP-1 γ
1	2vgl_A	100	0	0	744.5	595	7	607	gi|330804598|ref	XP_003290280.1	hypothetical protein DICPUDRAFT_56580 [Dictyostelium purpureum]	11	965	AP-2 α
1	2vgl_B	100	0	0	484.3	571	6	586	gi|330842409|ref	XP_003293171.1	hypothetical protein DICPUDRAFT_58333 [Dictyostelium purpureum]	7	832	AP-4 β4
1	2vgl_B	100	0	0	474.2	551	3	575	gi|330846196|ref	XP_003294933.1	hypothetical protein DICPUDRAFT_44136 [Dictyostelium purpureum]	7	1060	AP-3 β3
1	2vgl_B	96.5	2.8e-05	9.9e-10	79.6	168	17	187	gi|330797344|ref	XP_003286721.1	hypothetical protein DICPUDRAFT_97480 [Dictyostelium purpureum]	4	1279	TPLATE
1	2vgl_A	90.2	0.043	1.5e-06	60.1	84	330	424	gi|330845451|ref	XP_003294599.1	hypothetical protein DICPUDRAFT_159626 [Dictyostelium purpureum]	5	2009
1	2vgl_B	87.4	0.1	3.7e-06	53.8	170	134	311	gi|330805631|ref	XP_003290783.1	hypothetical protein DICPUDRAFT_56943 [Dictyostelium purpureum]	4	1400
1	2vgl_B	41.9	7.6	0.00027	38.1	70	480	550	gi|330791809|ref	XP_003283984.1	hypothetical protein DICPUDRAFT_74957 [Dictyostelium purpureum]	3	885	AP-5 ζ
1	3hs8_A	27.5	19	0.00065	28.6	26	39	65	gi|330843554|ref	XP_003293716.1	hypothetical protein DICPUDRAFT_158614 [Dictyostelium purpureum]	1	188
1	2vgl_B	21.4	29	0.001	31.9	32	467	498	gi|330842272|ref	XP_003293105.1	hypothetical protein DICPUDRAFT_157900 [Dictyostelium purpureum]	2	514
2	2vgl_B	99.9	5.7e-32	2e-36	267	429	12	461	gi|330800743|ref	XP_003288393.1	hypothetical protein DICPUDRAFT_47895 [Dictyostelium purpureum]	8	916	β-COP
2	1w63_A	82.8	0.27	9.3e-06	49.7	89	314	402	gi|330841597|ref	XP_003292781.1	hypothetical protein DICPUDRAFT_99465 [Dictyostelium purpureum]	4	988
2	2vgl_B	60.4	2.4	8.4e-05	41.6	65	165	231	gi|330827676|ref	XP_003291898.1	hypothetical protein DICPUDRAFT_156544 [Dictyostelium purpureum]	4	873	TSAUCER
2	1w63_A	29.5	16	0.00057	37.6	92	98	189	gi|330801524|ref	XP_003288776.1	hypothetical protein DICPUDRAFT_34586 [Dictyostelium purpureum]	5	1228	AP-5 β5
2	2g30_A	11.4	75	0.0026	29.9	58	56	113	gi|330846101|ref	XP_003294891.1	hypothetical protein DICPUDRAFT_159971 [Dictyostelium purpureum]	1	800
3	1w63_A	84.2	0.21	7.3e-06	51.3	117	85	206	gi|330798268|ref	XP_003287176.1	hypothetical protein DICPUDRAFT_151237 [Dictyostelium purpureum]	3	1153
3	1w63_A	60.1	2.5	8.6e-05	44.4	86	122	207	gi|330791815|ref	XP_003283987.1	hypothetical protein DICPUDRAFT_45165 [Dictyostelium purpureum]	5	1455
4	1w63_A	100	5.70006e-41	1.4013e-45	334.3	517	34	592	gi|330792653|ref	XP_003284402.1	hypothetical protein DICPUDRAFT_45443 [Dictyostelium purpureum]	7	889	γ-COP
4	2vgl_B	40.2	8.4	0.00029	42.6	258	118	383	gi|330842993|ref	XP_003293450.1	hypothetical protein DICPUDRAFT_84000 [Dictyostelium purpureum]	2	2934
5	2vgl_B	79.9	0.41	1.4e-05	39.7	80	95	178	gi|330818753|ref	XP_003291503.1	hypothetical protein DICPUDRAFT_57393 [Dictyostelium purpureum]	3	216
5	1w63_A	37.1	10	0.00035	36	72	159	233	gi|330790912|ref	XP_003283539.1	hypothetical protein DICPUDRAFT_74537 [Dictyostelium purpureum]	3	577
5	1kyf_A	35.7	11	0.00039	29.8	14	141	154	gi|330801167|ref	XP_003288601.1	hypothetical protein DICPUDRAFT_88117 [Dictyostelium purpureum]	2	220
6	2g30_A	69.4	1.2	4.3e-05	34.4	50	55	104	gi|330794625|ref	XP_003285378.1	hypothetical protein DICPUDRAFT_149279 [Dictyostelium purpureum]	2	151
7	1w63_A	94	0.0041	1.4e-07	63.9	283	113	414	gi|330798022|ref	XP_003287055.1	hypothetical protein DICPUDRAFT_151099 [Dictyostelium purpureum]	5	1168
8	1w63_A	93.9	0.0046	1.6e-07	66.2	89	364	452	gi|330791543|ref	XP_003283852.1	hypothetical protein DICPUDRAFT_147562 [Dictyostelium purpureum]	6	1754
8	2vgl_A	74.5	0.76	2.7e-05	40	92	380	471	gi|330803775|ref	XP_003289878.1	hypothetical protein DICPUDRAFT_20262 [Dictyostelium purpureum]	3	250
8	1w63_A	67.7	1.4	4.9e-05	43.8	199	246	450	gi|330843079|ref	XP_003293491.1	hypothetical protein DICPUDRAFT_158352 [Dictyostelium purpureum]	6
8	1w63_A	16.3	45	0.0016	36.9	78	153	232	gi|330827598|ref	XP_003291860.1	hypothetical protein DICPUDRAFT_156510 [Dictyostelium purpureum]	2
10	1w63_A	97.3	7.4e-07	2.6e-11	87.3	358	67	449	gi|330804750|ref	XP_003290354.1	hypothetical protein DICPUDRAFT_49156 [Dictyostelium purpureum]	5	731

## Sheet: Dictyostelium discoideum
Result no:	pdb info	Prob	E Value	P Value	Score	cols	thstt	thend	GenInfo number	Accession	Name	Repeats	Amino acids	ID
1	2vgl_B	100	0	0	463.7	576	4	588	gi|66810912|ref	XP_639163.1	adaptor-related protein complex 4, beta 1 subunit [Dictyostelium discoideum AX4]	7	838	AP-4 β4
1	2vgl_A	100	0	0	662	571	12	609	gi|66812406|ref	XP_640382.1	clathrin-adaptor gamma chain [Dictyostelium discoideum AX4]	10	895	AP-1 γ
1	2vgl_A	100	0	0	508.8	559	13	590	gi|66813980|ref	XP_641169.1	adaptin N-terminal domain-containing protein [Dictyostelium discoideum AX4]	6	1080	AP-4 ε
1	2vgl_A	100	0	0	476.9	530	11	589	gi|66815341|ref	XP_641687.1	delta adaptin [Dictyostelium discoideum AX4]	8	1143	AP-3 δ
1	2vgl_B	100	0	0	731.3	588	1	590	gi|66815659|ref	XP_641846.1	adaptor-related protein complex 1, beta 1 subunit [Dictyostelium discoideum AX4]	9	942	AP-1/2 β1/2
1	2vgl_B	100	0	0	485.5	552	2	575	gi|66822011|ref	XP_644360.1	beta adaptin [Dictyostelium discoideum AX4]	7	1108	AP-3 β3
1	2vgl_A	100	0	0	745.5	594	7	606	gi|66822529|ref	XP_644619.1	adaptor-related protein complex 2, alpha subunit [Dictyostelium discoideum AX4]	10	989	AP-2α
1	2vgl_A	100	0	0	745.6	595	7	607	gi|111226892|ref	XP_644631.2	adaptor-related protein complex 2, alpha subunit [Dictyostelium discoideum AX4]	10	989	AP-2 α
1	2vgl_B	100	0	0	485.5	552	2	575	gi|66823399|ref	XP_645054.1	beta adaptin [Dictyostelium discoideum AX4]	7	1108	AP-3 β3
1	2vgl_B	97.1	1.6e-06	5.5e-11	89.7	170	17	188	gi|66811580|ref	XP_639969.1	armadillo-like helical domain-containing protein [Dictyostelium discoideum AX4]	4	1408	TPLATE
2	2vgl_B	99.9	2.9e-32	1e-36	269	429	12	461	gi|66809305|ref	XP_638375.1	coatomer protein complex beta subunit [Dictyostelium discoideum AX4]	6	912	β-COP
2	1w63_A	82.8	0.27	9.4e-06	49.9	89	324	413	gi|66809595|ref	XP_638520.1	armadillo-like helical domain-containing protein [Dictyostelium discoideum AX4]	6	1024
2	2vgl_A	74.1	0.8	2.8e-05	44.4	81	74	155	gi|66800961|ref	XP_629406.1	hypothetical protein DDB_G0292876 [Dictyostelium discoideum AX4]	6	606
3	2vgl_B	72.8	0.9	3.2e-05	37.7	80	98	181	gi|66826695|ref	XP_646702.1	hypothetical protein DDB_G0271068 [Dictyostelium discoideum AX4]	5	220
4	1w63_A	100	3.7e-40	1.26117e-44	328.8	515	35	591	gi|66805117|ref	XP_636291.1	adaptin N-terminal domain-containing protein [Dictyostelium discoideum AX4]	7	898	γ-COP
4	2vgl_B	71.5	1	3.6e-05	46.5	176	355	538	gi|66799947|ref	XP_628899.1	condensin-2 complex subunit D3 [Dictyostelium discoideum AX4]	6	1403
4	2vgl_B	69.9	1.2	4.1e-05	49.7	227	118	350	gi|66815677|ref	XP_641855.1	HEAT repeat-containing protein [Dictyostelium discoideum AX4]	3	3103
4	3hs8_A	23.8	24	0.00085	22	9	55	63	gi|66805327|ref	XP_636396.1	hypothetical protein DDB_G0289087 [Dictyostelium discoideum AX4]	2	41
4	3zy7_A	19.3	34	0.0012	24.8	30	78	108	gi|66813284|ref	XP_640821.1	hypothetical protein DDB_G0281105 [Dictyostelium discoideum AX4]	3	239
5	1kyf_A	34	12	0.00043	30	14	141	154	gi|66826579|ref	XP_646644.1	hypothetical protein DDB_G0270242 [Dictyostelium discoideum AX4]	2	239
6	2vgl_B	81.3	0.34	1.2e-05	47.7	173	51	231	gi|66812584|ref	XP_640471.1	hypothetical protein DDB_G0281871 [Dictyostelium discoideum AX4]	2	877	TSAUCER
6	2vgl_A	80.3	0.39	1.4e-05	42.6	91	380	470	gi|66814254|ref	XP_641306.1	hypothetical protein DDB_G0280207 [Dictyostelium discoideum AX4]	3	285
7	1w63_A	97.4	2.7e-07	9.4e-12	91.2	357	68	449	gi|66805247|ref	XP_636356.1	hypothetical protein DDB_G0289233 [Dictyostelium discoideum AX4]	6	801
7	2vgl_B	93.7	0.0054	1.9e-07	62.6	71	118	191	gi|66807727|ref	XP_637586.1	HEAT repeat-containing protein [Dictyostelium discoideum AX4]	6	1233
7	2vgl_B	92.1	0.017	6.1e-07	61.1	123	64	187	gi|66816882|ref	XP_642419.1	non-SMC condensin II complex, subunit D3 [Dictyostelium discoideum AX4]	6	1791
7	1w63_A	49.8	4.7	0.00017	40.9	60	153	212	gi|66815413|ref	XP_641723.1	CAATT-binding protein [Dictyostelium discoideum AX4]	2	1053
9	2vgl_B	74.5	0.76	2.7e-05	47.6	220	136	366	gi|66819933|ref	XP_643624.1	hypothetical protein DDB_G0275929 [Dictyostelium discoideum AX4]	2	1450
10	2vgl_B	19.1	35	0.0012	33.8	90	479	569	gi|66799963|ref	XP_628907.1	hypothetical protein DDB_G0293988 [Dictyostelium discoideum AX4]	2	975	AP-5 ζ

## Sheet: Giardia lamblia
Result no:	pdb info	Prob	E Value	P Value	Score	cols	thstt	thend	GenInfo number	Accession	Name	Repeats	Amino acids	ID
1	2vgl_A	100	0	0	391.4	584	8	606	gi|159115822|ref	XP_001708133.1	Alpha adaptin [Giardia lamblia ATCC 50803]	4	783	AP-2 α
1	2vgl_B	100	0	0	498.4	562	11	576	gi|159116694|ref	XP_001708568.1	Beta adaptin [Giardia lamblia ATCC 50803]	7	1132	AP-1/2 β1/2
1	1w63_A	99.9	1.2e-31	4.5e-36	263.6	387	10	396	gi|159111204|ref	XP_001705834.1	Gamma adaptin [Giardia lamblia ATCC 50803]	7	892	AP-1 γ
1	2vgl_B	99.9	7e-29	2.6e-33	241.3	378	14	399	gi|159118260|ref	XP_001709349.1	Adaptor protein complex large chain subunit BetaA [Giardia lamblia ATCC 50803]	5	672	AP-1/2 β1/2
1	2vgl_B	97.8	2e-08	7.5e-13	102.4	169	21	192	gi|159119290|ref	XP_001709863.1	Coatomer beta subunit [Giardia lamblia ATCC 50803]	5	1048	β-COP
6	1gyu_A	23.3	23	0.00088	20.5	12	112	123	gi|159115466|ref	XP_001707956.1	Hypothetical protein GL50803_28060 [Giardia lamblia ATCC 50803]	2	46

[truncated: 5 more sheets: Homo sapiens, Saccharomyces cerevisiae, Schizosaccharomyces pombe, Drosophila melanogaster, Caenorhabditis elegans]
