# Supplementary material for: Characterization of TSET, an ancient and widespread membrane trafficking complex
Source: eLife. 2014 May 27;3:e02866. doi: 10.7554/eLife.02866 (PMC4031984; doi:10.7554/eLife.02866)
Supplement: Figure 1—source data 2. — DOI: http://dx.doi.org/10.7554/eLife.02866.005 [file elife-02866-fig1-data2.xlsx]

## Sheet: Arabidopsis thaliana
Result no:	pdb info	Prob	E Value	P Value	Score	cols	thstt	thend	GenInfo number	Accession	Name	Repeats	Amino acids	ID
1	1w63_M	100	4.6e-36	1.7e-40	275.9	380	1	399	gi|79327017|ref	NP_001031836.1	coatomer subunit delta [Arabidopsis thaliana]	6	527	δ-COP
1	2vgl_M	100	0	0	508.3	356	1	358	gi|334186885|ref	NP_001190824.1	AP-4 complex subunit mu-1 [Arabidopsis thaliana]	6	385	AP-4 μ4
1	2vgl_M	100	0	0	651.3	418	2	435	gi|15220202|ref	NP_172543.1	AP-1 complex subunit mu [Arabidopsis thaliana]	6	428	AP-1 μ1
1	2vgl_M	100	0	0	509.8	405	1	435	gi|42562792|ref	NP_176052.3	clathrin adaptor complexes medium subunit-like protein [Arabidopsis thaliana]	6	415	AP-3 μ3
1	2vgl_M	100	0	0	670.3	418	2	435	gi|15219810|ref	NP_176277.1	AP-1 complex subunit mu [Arabidopsis thaliana]	6	428	AP-1 μ1
1	1w63_Q	100	4.3e-34	1.6e-38	203.3	139	2	140	gi|15224841|ref	NP_179569.1	AP-4 complex subunit sigma [Arabidopsis thaliana]	1	143	AP-4 σ4
1	2vgl_M	100	0	0	636.8	428	1	435	gi|15233859|ref	NP_194186.1	AP-4 complex subunit mu-1 [Arabidopsis thaliana]	6	451	AP-4 μ4
1	1w63_Q	100	2.9e-37	1.10002e-41	223.4	154	1	154	gi|15237005|ref	NP_195267.1	AP-1 complex subunit sigma-2 [Arabidopsis thaliana]	4	162	AP-1 σ1
1	2vgl_M	100	0	0	698.8	428	2	435	gi|15237475|ref	NP_199475.1	AP-2 complex subunit mu-1 [Arabidopsis thaliana]	6	438	AP-2 μ2
1	1w63_Q	100	3e-37	1.10002e-41	223.1	154	1	154	gi|18398407|ref	NP_565415.1	AP-1 complex subunit sigma-1 [Arabidopsis thaliana]	4	161	AP-1 σ1
1	1w63_M	100	4.6e-36	1.7e-40	275.9	380	1	399	gi|18414767|ref	NP_568147.1	coatomer subunit delta [Arabidopsis thaliana]	6	527	δ-COP
1	2vgl_M	100	0	0	507.5	356	1	358	gi|30686572|ref	NP_849437.1	AP-4 complex subunit mu-1 [Arabidopsis thaliana]	6	380	AP-4 μ4
1	2vgl_M	100	0	0	637.9	404	2	407	gi|42573598|ref	NP_974895.1	AP-2 complex subunit mu-1 [Arabidopsis thaliana]	6	441	AP-2 μ2
1	1w63_Q	99.9	1.8e-33	6.9e-38	199.9	140	1	140	gi|15220987|ref	NP_175219.1	AP-2 complex subunit sigma [Arabidopsis thaliana]	4	142	AP-2 σ2
1	1w63_Q	99.9	8e-33	3e-37	200.7	152	1	152	gi|22331732|ref	NP_190655.2	AP-3 complex subunit sigma [Arabidopsis thaliana]	4	166	AP-3 σ3
1	1w63_Q	99.9	1.2e-29	4.6e-34	176.8	113	1	113	gi|30690340|ref	NP_849496.1	AP-1 complex subunit sigma-2 [Arabidopsis thaliana]	4	124	AP-1 σ1
1	2vgl_M	99.7	3.3e-21	1.3e-25	184.8	269	107	406	gi|30681135|ref	NP_850004.1	clathrin adaptor complexes medium subunit family protein [Arabidopsis thaliana]	4	613	AP-5 μ5
1	2vgl_M	99.7	7.3e-22	2.8e-26	184.3	266	110	406	gi|42570843|ref	NP_973495.1	clathrin adaptor complexes medium subunit family protein [Arabidopsis thaliana]	4	475	AP-5 μ5
1	2vgl_M	99.7	1.6e-21	5.9e-26	179.9	234	110	374	gi|42570845|ref	NP_973496.1	clathrin adaptor complexes medium subunit family protein [Arabidopsis thaliana]	4	427	AP-5 μ5
1	2vgl_S	99	9.7e-14	3.7e-18	96.6	134	1	135	gi|15218136|ref	NP_172989.1	SNARE-like protein [Arabidopsis thaliana]	4	147	TSPOON
1	1w63_Q	87.8	0.087	3.3e-06	43.9	69	3	72	gi|18401727|ref	NP_029426.1	SAND family protein [Arabidopsis thaliana]	4	607	Mon1
2	1w63_Q	99.8	5.3e-24	2e-28	155.8	139	2	140	gi|186509930|ref	NP_566358.3	coatomer subunit zeta-2 [Arabidopsis thaliana]	4	179	ζ-COP
2	1w63_Q	99.8	2.4e-23	9.1e-28	152.5	138	2	139	gi|18413126|ref	NP_567337.1	coatomer subunit zeta-3 [Arabidopsis thaliana]	4	181	ζ-COP
2	1w63_Q	99.7	2.8e-22	1.1e-26	146.4	135	2	136	gi|18406956|ref	NP_564767.1	coatomer subunit zeta-1 [Arabidopsis thaliana]	4	177	ζ-COP
2	1w63_M	95.4	0.00045	1.7e-08	64.8	138	254	396	gi|15242141|ref	NP_200555.1	uncharacterized protein [Arabidopsis thaliana]	8	646	TCUP
4	2vgl_M	34.5	11	0.00042	27	16	243	258	gi|145331089|ref	NP_001078036.1	maternally expressed family protein [Arabidopsis thaliana]	3	74
4	1w63_Q	19.9	30	0.0011	26.7	18	6	23	gi|15239647|ref	NP_200256.1	uncharacterized protein [Arabidopsis thaliana]	2	368
10	1i31_A	47.1	5.2	0.0002	29.3	38	37	80	gi|334185072|ref	NP_001189805.1	60S ribosomal protein L23 [Arabidopsis thaliana]	3	125
10	1i31_A	42.9	6.6	0.00025	29.2	38	37	80	gi|15226102|ref	NP_180895.1	60S ribosomal protein L23 [Arabidopsis thaliana]	2	140
10	1i31_A	42.9	6.6	0.00025	29.2	38	37	80	gi|15229287|ref	NP_187090.1	60S ribosomal protein L23 [Arabidopsis thaliana]	2	140
10	1i31_A	42.9	6.6	0.00025	29.2	38	37	80	gi|18390397|ref	NP_563707.1	60S ribosomal protein L23 [Arabidopsis thaliana]	2	140

## Sheet: Selaginella moellendorffii
Result no:	pdb info	Prob	E Value	P Value	Score	cols	thstt	thend	GenInfo number	Accession	Name	Repeats	Amino acids	ID
1	2vgl_M	100	0	0	574	423	1	435	gi|302758420|ref	XP_002962633.1	hypothetical protein SELMODRAFT_141330 [Selaginella moellendorffii]	6	446	AP-4 μ4
1	1w63_M	100	0	0	605.2	420	2	422	gi|302770891|ref	XP_002968864.1	hypothetical protein SELMODRAFT_91068 [Selaginella moellendorffii]	6	431	AP-1 μ1
1	1w63_M	100	0	0	628.4	420	2	422	gi|302783044|ref	XP_002973295.1	hypothetical protein SELMODRAFT_173172 [Selaginella moellendorffii]	5	438	AP-2 μ2
1	1w63_M	100	0	0	605.2	420	2	422	gi|302784670|ref	XP_002974107.1	hypothetical protein SELMODRAFT_100170 [Selaginella moellendorffii]	6	431	AP-1 μ1
1	1w63_M	100	0	0	628.4	420	2	422	gi|302789682|ref	XP_002976609.1	hypothetical protein SELMODRAFT_271210 [Selaginella moellendorffii]	6	438	AP-2 μ2
1	2vgl_M	100	0	0	492.4	406	1	435	gi|302794057|ref	XP_002978793.1	hypothetical protein SELMODRAFT_109656 [Selaginella moellendorffii]	6	415	AP-3 μ3
1	2vgl_M	100	0	0	574	423	1	435	gi|302797392|ref	XP_002980457.1	hypothetical protein SELMODRAFT_228695 [Selaginella moellendorffii]	6	446	AP-4 μ4
1	2vgl_M	100	0	0	491	406	1	435	gi|302805911|ref	XP_002984706.1	hypothetical protein SELMODRAFT_181161 [Selaginella moellendorffii]	6	415	AP-3 μ3
1	1w63_M	99.9	1.2e-32	4.3e-37	253.5	373	1	399	gi|302781064|ref	XP_002972306.1	hypothetical protein SELMODRAFT_172790 [Selaginella moellendorffii]	6	507	δ-COP
1	1w63_M	99.5	5.1e-18	1.8e-22	159.6	234	150	397	gi|302773550|ref	XP_002970192.1	hypothetical protein SELMODRAFT_267388 [Selaginella moellendorffii]	4	613	AP-5 μ5
1	1w63_M	99.5	5.1e-18	1.8e-22	159.6	261	114	397	gi|302793184|ref	XP_002978357.1	hypothetical protein SELMODRAFT_176924 [Selaginella moellendorffii]	4	613	AP-5 μ5
1	2vgl_S	99.2	3e-15	1e-19	102.8	133	1	136	gi|302785257|ref	XP_002974400.1	hypothetical protein SELMODRAFT_100915 [Selaginella moellendorffii]	4	147	TSPOON
1	2vgl_S	99.2	4.3e-15	1.5e-19	102	133	1	136	gi|302808007|ref	XP_002985698.1	hypothetical protein SELMODRAFT_269018 [Selaginella moellendorffii]	4	147	TSPOON
1	2vgl_S	85.9	0.15	5.2e-06	39.1	67	53	119	gi|302803757|ref	XP_002983631.1	hypothetical protein SELMODRAFT_180354 [Selaginella moellendorffii]	4	395	TCUP
1	2vgl_S	77.2	0.57	2e-05	37.2	92	3	95	gi|302762114|ref	XP_002964479.1	hypothetical protein SELMODRAFT_438801 [Selaginella moellendorffii]	4	548	Mon1
1	2vgl_S	77	0.58	2e-05	37.2	92	3	95	gi|302787092|ref	XP_002975316.1	hypothetical protein SELMODRAFT_174856 [Selaginella moellendorffii]	4	549	Mon1
2	2vgl_S	99.9	3.4e-27	1.2e-31	162.3	137	1	137	gi|302758540|ref	XP_002962693.1	hypothetical protein SELMODRAFT_79294 [Selaginella moellendorffii]	4	145	AP-3 σ3
2	2vgl_S	99.9	3.1e-28	1.1e-32	166.8	136	2	137	gi|302783394|ref	XP_002973470.1	hypothetical protein SELMODRAFT_59248 [Selaginella moellendorffii]	5	141	AP-1 σ1
2	2vgl_S	99.9	1.3e-26	4.6e-31	159.3	137	1	137	gi|302797280|ref	XP_002980401.1	hypothetical protein SELMODRAFT_419894 [Selaginella moellendorffii]	4	145	AP-3 σ3
2	2vgl_S	99.9	9.3e-30	3.3e-34	174.7	139	2	140	gi|302798471|ref	XP_002980995.1	hypothetical protein SELMODRAFT_113878 [Selaginella moellendorffii]	4	143	AP-4 σ4
2	2vgl_S	99.9	9.3e-30	3.3e-34	174.7	139	2	140	gi|302801438|ref	XP_002982475.1	hypothetical protein SELMODRAFT_421882 [Selaginella moellendorffii]	4	143	AP-4 σ4
2	2vgl_S	99.9	4.6e-28	1.6e-32	169	138	2	139	gi|302806725|ref	XP_002985094.1	hypothetical protein SELMODRAFT_121449 [Selaginella moellendorffii]	4	161	AP-1 σ1
2	2vgl_S	99.9	5.2e-29	1.8e-33	173.8	139	1	139	gi|302809017|ref	XP_002986202.1	hypothetical protein SELMODRAFT_182285 [Selaginella moellendorffii]	4	161	AP-1 σ1
2	2vgl_S	99.9	1.2e-28	4.2e-33	171.7	139	2	140	gi|302809990|ref	XP_002986687.1	hypothetical protein SELMODRAFT_49179 [Selaginella moellendorffii]	4	159	AP-1 σ1
2	2vgl_S	99.9	8.6e-28	3e-32	164.8	141	1	141	gi|302811191|ref	XP_002987285.1	hypothetical protein SELMODRAFT_271913 [Selaginella moellendorffii]	4	142	AP-2 σ2
2	2vgl_S	99.9	1.8e-28	6.3e-33	168.2	141	1	141	gi|302815031|ref	XP_002989198.1	hypothetical protein SELMODRAFT_272044 [Selaginella moellendorffii]	4	142	AP-2 σ2
2	2vgl_S	99.8	3.6e-26	1.3e-30	159.8	131	9	139	gi|302809021|ref	XP_002986204.1	hypothetical protein SELMODRAFT_446561 [Selaginella moellendorffii]	4	164	AP-1 σ1
2	2vgl_S	99.7	9.8e-22	3.4e-26	138.9	135	2	136	gi|302786772|ref	XP_002975157.1	hypothetical protein SELMODRAFT_442701 [Selaginella moellendorffii]	4	179	ζ-COP
2	2vgl_S	99.7	8.8e-22	3.1e-26	139.1	135	2	136	gi|302791591|ref	XP_002977562.1	hypothetical protein SELMODRAFT_176297 [Selaginella moellendorffii]	4	179	ζ-COP
2	2vgl_S	99.4	1.3e-16	4.5e-21	104	75	59	133	gi|302809025|ref	XP_002986206.1	hypothetical protein SELMODRAFT_123571 [Selaginella moellendorffii]	4	101	AP-1 σ1
4	1w63_M	18.6	36	0.0013	25.6	17	232	248	gi|302821546|ref	XP_002992435.1	hypothetical protein SELMODRAFT_135317 [Selaginella moellendorffii]	2	123
5	1w63_M	52.6	4	0.00014	36.6	28	391	418	gi|302758466|ref	XP_002962656.1	hypothetical protein SELMODRAFT_404600 [Selaginella moellendorffii]	3	419
5	1i31_A	24.6	23	0.0008	25.5	16	36	51	gi|302823842|ref	XP_002993569.1	hypothetical protein SELMODRAFT_49683 [Selaginella moellendorffii]	2	103
6	1w63_M	58.2	2.8	9.8e-05	36.7	30	390	419	gi|302797344|ref	XP_002980433.1	hypothetical protein SELMODRAFT_419964 [Selaginella moellendorffii]	3	350
7	2vgl_S	50	4.7	0.00016	26.2	23	3	25	gi|302790764|ref	XP_002977149.1	hypothetical protein SELMODRAFT_232889 [Selaginella moellendorffii]	2	128
8	1w63_Q	29.5	16	0.00057	26.2	30	107	136	gi|302760441|ref	XP_002963643.1	hypothetical protein SELMODRAFT_404971 [Selaginella moellendorffii]	4	203

## Sheet: Physcomitrella patens
Result no:	pdb info	Prob	E Value	P Value	Score	cols	thstt	thend	GenInfo number	Accession	Name	Repeats	Amino acids	ID
1	1w63_M	100	2.5e-35	8.9e-40	272.2	392	1	420	gi|168005544|ref	XP_001755470.1	predicted protein [Physcomitrella patens subsp. patens]	6	521	δ-COP
1	1w63_M	100	1.2e-33	4.1e-38	261.1	392	1	420	gi|168016282|ref	XP_001760678.1	predicted protein [Physcomitrella patens subsp. patens]	6	521	δ-COP
1	1w63_M	100	0	0	622.7	420	2	422	gi|168019730|ref	XP_001762397.1	predicted protein [Physcomitrella patens subsp. patens]	6	439	Mon1
1	2vgl_M	100	0	0	572.5	430	1	435	gi|168029194|ref	XP_001767111.1	predicted protein [Physcomitrella patens subsp. patens]	6	455	AP-4 μ4
1	2vgl_M	100	0	0	501.8	406	1	435	gi|168036700|ref	XP_001770844.1	predicted protein [Physcomitrella patens subsp. patens]	6	418	AP-3 μ3
1	1w63_M	100	0	0	620.4	420	2	422	gi|168046661|ref	XP_001775791.1	predicted protein [Physcomitrella patens subsp. patens]	6	439	AP-2 μ2
1	1w63_M	100	0	0	601.6	420	2	422	gi|168058688|ref	XP_001781339.1	predicted protein [Physcomitrella patens subsp. patens]	6	427	AP-1 μ1
1	1w63_M	100	0	0	608.3	420	2	422	gi|168060775|ref	XP_001782369.1	predicted protein [Physcomitrella patens subsp. patens]	6	427	AP-1 μ1
1	1w63_M	99.9	3.6e-33	1.3e-37	257.8	391	1	420	gi|168001282|ref	XP_001753344.1	predicted protein [Physcomitrella patens subsp. patens]	6	521	δ-COP
1	1w63_M	99.9	1.3e-28	4.7e-33	227	342	28	394	gi|168002114|ref	XP_001753759.1	predicted protein [Physcomitrella patens subsp. patens]	6	514	δ-COP
1	1w63_M	99.4	1.5e-16	5.1e-21	149.4	232	154	399	gi|168044805|ref	XP_001774870.1	predicted protein [Physcomitrella patens subsp. patens]	4	600	AP-5 μ5
1	2vgl_S	99.1	1.3e-14	4.4e-19	99.6	133	1	136	gi|167999323|ref	XP_001752367.1	predicted protein [Physcomitrella patens subsp. patens]	4	146	TSPOON
1	2vgl_S	84.7	0.19	6.7e-06	39.2	81	3	86	gi|168066610|ref	XP_001785228.1	predicted protein [Physcomitrella patens subsp. patens]	4	457	Mon1
1	1w63_Q	53.3	3.8	0.00013	27.6	20	4	23	gi|168071296|ref	XP_001787126.1	predicted protein [Physcomitrella patens subsp. patens]	4	124
2	2vgl_S	99.9	2.3e-30	8.2e-35	180.6	139	2	140	gi|168033991|ref	XP_001769497.1	predicted protein [Physcomitrella patens subsp. patens]	4	161	AP-1 σ1
2	2vgl_S	99.9	2.3e-26	8.1e-31	158.1	136	1	136	gi|168036354|ref	XP_001770672.1	predicted protein [Physcomitrella patens subsp. patens]	4	145	AP-3 σ3
2	2vgl_S	99.9	2.7e-27	9.4e-32	162.3	140	1	140	gi|168049922|ref	XP_001777410.1	predicted protein [Physcomitrella patens subsp. patens]	4	142	AP-2 σ2
2	2vgl_S	99.9	2.5e-31	8.8e-36	185.5	140	1	140	gi|168051195|ref	XP_001778041.1	predicted protein [Physcomitrella patens subsp. patens]	4	161	AP-1 σ1
2	2vgl_S	99.9	2.8e-29	9.9e-34	172.3	139	2	140	gi|168066797|ref	XP_001785318.1	predicted protein [Physcomitrella patens subsp. patens]	4	143	AP-4 σ4
2	2vgl_S	99.8	1.9e-25	6.7e-30	155.2	139	2	140	gi|168053306|ref	XP_001779078.1	predicted protein [Physcomitrella patens subsp. patens]	4	157	AP-2 σ2
2	2vgl_S	99.7	1.3e-21	4.7e-26	138.1	135	2	136	gi|168001064|ref	XP_001753235.1	predicted protein [Physcomitrella patens subsp. patens]	4	178	ζ-COP
2	2vgl_S	99.7	4.3e-21	1.5e-25	135.4	136	2	137	gi|168003203|ref	XP_001754302.1	predicted protein [Physcomitrella patens subsp. patens]	4	178	ζ-COP
2	2vgl_S	99.7	9.9e-22	3.5e-26	138.7	136	2	137	gi|168020336|ref	XP_001762699.1	predicted protein [Physcomitrella patens subsp. patens]	4	178	ζ-COP
2	2vgl_S	98.6	1.6e-11	5.6e-16	86	124	2	126	gi|168025119|ref	XP_001765082.1	predicted protein [Physcomitrella patens subsp. patens]	4	173	ζ-COP
2	1w63_M	92.2	0.017	6e-07	54.4	66	54	119	gi|168065336|ref	XP_001784609.1	predicted protein [Physcomitrella patens subsp. patens]	8	631	TCUP
3	2vgl_S	18.5	37	0.0013	18.9	24	45	68	gi|168046040|ref	XP_001775483.1	predicted protein [Physcomitrella patens subsp. patens]	2	52
5	2vgl_M	30.3	15	0.00054	29	29	109	137	gi|168050709|ref	XP_001777800.1	predicted protein [Physcomitrella patens subsp. patens]	3	160
5	1i31_A	17.5	40	0.0014	26.7	14	138	151	gi|168038361|ref	XP_001771669.1	predicted protein [Physcomitrella patens subsp. patens]	2	201
6	2vgl_M	34	12	0.00043	29	34	158	191	gi|168003908|ref	XP_001754654.1	predicted protein [Physcomitrella patens subsp. patens]	3	137
8	2vgl_S	47.8	5.3	0.00019	25.6	24	3	26	gi|168065713|ref	XP_001784792.1	predicted protein [Physcomitrella patens subsp. patens]	2	117
10	3l81_A	28.9	17	0.00059	26.2	11	100	110	gi|168008920|ref	XP_001757154.1	predicted protein [Physcomitrella patens subsp. patens]	3	112

## Sheet: Vitis vinifera
Result no:	pdb info	Prob	E Value	P Value	Score	cols	thstt	thend	GenInfo number	Accession	Name	Repeats	Amino acids	ID
1	1w63_M	100	0	0	609	420	2	422	gi|225470599|ref	XP_002274463.1	PREDICTED: hypothetical protein [Vitis vinifera]	6	428	AP-1 μ1
1	1w63_M	100	0	0	634.2	420	2	422	gi|225427268|ref	XP_002281297.1	PREDICTED: hypothetical protein [Vitis vinifera]	6	438	AP-2 μ2
1	1w63_M	100	0	0	567	419	2	422	gi|225458187|ref	XP_002281307.1	PREDICTED: hypothetical protein [Vitis vinifera]	6	451	AP-4 μ4
1	2vgl_M	100	0	0	502.3	405	1	435	gi|225450531|ref	XP_002281428.1	PREDICTED: hypothetical protein [Vitis vinifera]	6	415	AP-3 μ3
1	1w63_M	99.9	1.8e-32	6.3e-37	253.7	390	1	419	gi|225423658|ref	XP_002276172.1	PREDICTED: hypothetical protein [Vitis vinifera]	6	531	δ-COP
1	1w63_M	99.6	4.5e-19	1.6e-23	167.1	269	111	399	gi|225432476|ref	XP_002279067.1	PREDICTED: hypothetical protein [Vitis vinifera]	4	627	AP-5 μ5
1	1w63_Q	99.1	2.2e-14	7.7e-19	101.8	137	1	138	gi|225442985|ref	XP_002268544.1	PREDICTED: hypothetical protein [Vitis vinifera]	4	147	TSPOON
1	2vgl_S	81.4	0.33	1.2e-05	39.1	70	3	76	gi|225435323|ref	XP_002285170.1	PREDICTED: hypothetical protein [Vitis vinifera]	4	615	Mon1
2	2vgl_S	99.9	1.6e-30	5.7e-35	181.4	141	1	141	gi|225425515|ref	XP_002263114.1	PREDICTED: hypothetical protein [Vitis vinifera]	4	161	AP-1 σ1
2	2vgl_S	99.9	3.9e-29	1.4e-33	175	142	1	142	gi|225430762|ref	XP_002266832.1	PREDICTED: hypothetical protein [Vitis vinifera]	4	165	AP-3 σ3
2	2vgl_S	99.9	5.9e-28	2.1e-32	165.6	141	1	141	gi|225431145|ref	XP_002268045.1	PREDICTED: hypothetical protein [Vitis vinifera]	4	143	AP-2 σ2
2	2vgl_S	99.9	3.4e-30	1.2e-34	179.8	141	1	141	gi|225464497|ref	XP_002269251.1	PREDICTED: hypothetical protein [Vitis vinifera]	4	161	AP-1 σ1
2	2vgl_S	99.9	1.7e-27	6.1e-32	163.3	141	1	141	gi|225457985|ref	XP_002275803.1	PREDICTED: hypothetical protein [Vitis vinifera]	4	142	AP-2 σ2
2	2vgl_S	99.9	3.3e-27	1.1e-31	162.1	140	2	141	gi|225445033|ref	XP_002283179.1	PREDICTED: hypothetical protein [Vitis vinifera]	4	143	AP-4 σ4
2	1w63_Q	99.6	2.1e-20	7.4e-25	136.2	150	2	151	gi|225463398|ref	XP_002273766.1	PREDICTED: hypothetical protein isoform 1 [Vitis vinifera]	4	177	ζ-COP
2	2vgl_S	99.5	1.1e-18	3.7e-23	123.6	130	2	131	gi|225442214|ref	XP_002277175.1	PREDICTED: hypothetical protein [Vitis vinifera]	4	183	ζ-COP
2	1w63_Q	98.2	8.4e-10	3e-14	78.5	94	2	95	gi|225463400|ref	XP_002273823.1	PREDICTED: hypothetical protein isoform 2 [Vitis vinifera]	4	151	ζ-COP
2	1i31_A	88.9	0.069	2.4e-06	49.3	135	145	284	gi|225446050|ref	XP_002271128.1	PREDICTED: hypothetical protein [Vitis vinifera]	8	635	TCUP
5	1i31_A	26.2	20	0.00071	29.3	26	134	159	gi|225463647|ref	XP_002272398.1	PREDICTED: hypothetical protein [Vitis vinifera]	2	252
6	1i31_A	22.1	27	0.00096	29.1	26	134	159	gi|225463637|ref	XP_002272205.1	PREDICTED: hypothetical protein [Vitis vinifera]	2	299
7	3l81_A	22.3	27	0.00095	27.6	25	111	135	gi|225463639|ref	XP_002274511.1	PREDICTED: hypothetical protein isoform 1 [Vitis vinifera]	3	213
7	3l81_A	21.6	29	0.001	27.5	25	111	135	gi|225463641|ref	XP_002274543.1	PREDICTED: hypothetical protein isoform 2 [Vitis vinifera]	2	218
8	3l81_A	22.4	27	0.00094	27.6	25	111	135	gi|225463657|ref	XP_002275291.1	PREDICTED: hypothetical protein isoform 2 [Vitis vinifera]	3	214
10	2vgl_S	43.1	7.1	0.00025	25.7	92	2	95	gi|225450514|ref	XP_002281149.1	PREDICTED: hypothetical protein [Vitis vinifera]	4	141
10	3l81_A	22	28	0.00097	27.5	25	111	135	gi|225463631|ref	XP_002274286.1	PREDICTED: hypothetical protein isoform 2 [Vitis vinifera]	3	214

## Sheet: Volvox carteri
Result no:	pdb info	Prob	E Value	P Value	Score	cols	thstt	thend	GenInfo number	Accession	Name	Repeats	Amino acids	ID
1	1w63_M	100	0	0	633.9	422	1	423	gi|302828478|ref	XP_002945806.1	hypothetical protein VOLCADRAFT_108841 [Volvox carteri f. nagariensis]	6	425	AP-1 μ1
1	1w63_M	100	0	0	500.5	418	2	422	gi|302840626|ref	XP_002951868.1	hypothetical protein VOLCADRAFT_61858 [Volvox carteri f. nagariensis]	6	450	AP-4 μ4
1	1w63_M	100	0	0	567.5	405	3	422	gi|302842720|ref	XP_002952903.1	hypothetical protein VOLCADRAFT_93610 [Volvox carteri f. nagariensis]	6	439	AP-2 μ2
1	1w63_M	99.9	5.9e-32	2.1e-36	249.1	373	1	400	gi|302829965|ref	XP_002946549.1	hypothetical protein VOLCADRAFT_79089 [Volvox carteri f. nagariensis]	6	510	δ-COP
1	2vgl_S	99	2.2e-13	7.8e-18	93.8	134	2	135	gi|302835866|ref	XP_002949494.1	hypothetical protein VOLCADRAFT_104299 [Volvox carteri f. nagariensis]	4	151	TSPOON
1	1w63_Q	70.9	1.1	3.8e-05	37.3	73	3	78	gi|302836937|ref	XP_002950028.1	hypothetical protein VOLCADRAFT_120834 [Volvox carteri f. nagariensis]	4	598	Mon1
2	2vgl_S	99.9	3.6e-29	1.2e-33	172	140	1	140	gi|302838374|ref	XP_002950745.1	hypothetical protein VOLCADRAFT_109095 [Volvox carteri f. nagariensis]	4	144	AP-4 σ4
2	2vgl_S	99.9	8.6e-30	3e-34	174.9	141	1	141	gi|302847048|ref	XP_002955059.1	hypothetical protein VOLCADRAFT_76532 [Volvox carteri f. nagariensis]	4	143	AP-2 σ2
2	2vgl_S	99.9	1.5e-27	5.4e-32	165.6	141	1	141	gi|302847413|ref	XP_002955241.1	hypothetical protein VOLCADRAFT_106707 [Volvox carteri f. nagariensis]	4	156	AP-1 σ1
2	1w63_Q	99.7	1.1e-20	3.9e-25	138.4	139	2	140	gi|302853125|ref	XP_002958079.1	hypothetical protein VOLCADRAFT_107955 [Volvox carteri f. nagariensis]	4	184	ζ-COP
4	1i31_A	34.3	12	0.00042	29.9	15	121	135	gi|302850497|ref	XP_002956775.1	hypothetical protein VOLCADRAFT_67442 [Volvox carteri f. nagariensis]	3	209
6	2vgl_S	68.1	1.4	4.8e-05	37.5	73	54	126	gi|302854556|ref	XP_002958785.1	hypothetical protein VOLCADRAFT_108314 [Volvox carteri f. nagariensis]	4	993	TCUP

## Sheet: Naegleria gruberi
Result no:	pdb info	Prob	E Value	P Value	Score	cols	thstt	thend	GenInfo number	Accession	Name	Repeats	Amino acids	ID
1	2vgl_M	100	0	0	686.2	420	1	435	gi|290978403|ref	XP_002671925.1	predicted protein [Naegleria gruberi]	6	425	AP-2 μ2
1	2vgl_M	100	0	0	546.4	415	2	435	gi|290985203|ref	XP_002675315.1	predicted protein [Naegleria gruberi]	6	430	AP-4 μ4
1	1w63_M	100	1.7e-36	6.40001e-41	280.5	376	1	395	gi|290993685|ref	XP_002679463.1	coatomer delta subunit [Naegleria gruberi]	6	558	δ-COP
1	2vgl_M	100	0	0	561.2	405	2	435	gi|290996899|ref	XP_002681019.1	predicted protein [Naegleria gruberi]	6	424	AP-3 μ3
1	2vgl_M	100	0	0	522.1	419	2	435	gi|290998141|ref	XP_002681639.1	clathrin coat assembly protein [Naegleria gruberi]	6	445	AP-4 μ4
1	1w63_Q	100	1.6e-35	6.10001e-40	212.4	148	1	148	gi|291001687|ref	XP_002683410.1	predicted protein [Naegleria gruberi]	4	152	AP-1 σ1
1	1w63_Q	100	2e-35	7.5e-40	210	142	1	142	gi|291001725|ref	XP_002683429.1	predicted protein [Naegleria gruberi]	4	142	AP-2 σ2
1	1w63_Q	99.9	1.6e-30	6.1e-35	188.1	143	1	143	gi|290991967|ref	XP_002678606.1	predicted protein [Naegleria gruberi]	4	163	AP-3 σ3
1	1w63_Q	99.9	2.5e-32	9.6e-37	194.2	142	1	142	gi|291001969|ref	XP_002683551.1	predicted protein [Naegleria gruberi]	4	143	AP-4 σ4
1	1w63_M	99.5	3e-18	1.1e-22	161.3	271	109	397	gi|290989720|ref	XP_002677485.1	hypothetical protein NAEGRDRAFT_79617 [Naegleria gruberi]	4	656	AP-5 μ5
1	1w63_Q	95.4	0.00044	1.7e-08	55.8	106	3	109	gi|290998351|ref	XP_002681744.1	predicted protein [Naegleria gruberi]	4	435	Mon1
2	1w63_Q	91.7	0.021	7.9e-07	42.2	83	54	136	gi|290980827|ref	XP_002673133.1	predicted protein [Naegleria gruberi]	4	222	TSPOON
2	2vgl_S	77.9	0.49	1.8e-05	40.2	91	30	120	gi|290977204|ref	XP_002671328.1	predicted protein [Naegleria gruberi]	4	888	TCUP
3	1i31_A	23.2	23	0.00088	31.5	18	119	136	gi|290978188|ref	XP_002671818.1	predicted protein [Naegleria gruberi]	3	573

## Sheet: Micromonas pusilla
Result no:	pdb info	Prob	E Value	P Value	Score	cols	thstt	thend	GenInfo number	Accession	Name	Repeats	Amino acids	ID
1	2vgl_M	100	0	0	577.7	416	2	435	gi|303274558|ref	XP_003056598.1	predicted protein [Micromonas pusilla CCMP1545]	6	438	AP-1 μ1
1	2vgl_M	100	0	0	443.4	405	2	435	gi|303278100|ref	XP_003058343.1	predicted protein [Micromonas pusilla CCMP1545]	6	443	AP-3 μ3
1	1w63_M	100	0	0	609.1	421	2	423	gi|303288441|ref	XP_003063509.1	predicted protein [Micromonas pusilla CCMP1545]	6	455	AP-2 μ2
1	2vgl_M	100	0	0	499.3	434	1	435	gi|303289797|ref	XP_003064186.1	predicted protein [Micromonas pusilla CCMP1545]	6	508	AP-4 μ4
1	1w63_M	99.9	4e-29	1.4e-33	232	371	1	399	gi|303271151|ref	XP_003054937.1	predicted protein [Micromonas pusilla CCMP1545]	6	544	δ-COP
1	2vgl_S	97.8	2.9e-08	1e-12	71	129	2	130	gi|303277155|ref	XP_003057871.1	predicted protein [Micromonas pusilla CCMP1545]	4	206	TSPOON
2	2vgl_S	99.9	8.1e-30	2.9e-34	177.7	139	1	139	gi|303272459|ref	XP_003055591.1	predicted protein [Micromonas pusilla CCMP1545]	4	160	AP-1 σ1
2	2vgl_S	99.9	7.9e-27	2.8e-31	160.7	136	2	137	gi|303272659|ref	XP_003055691.1	predicted protein [Micromonas pusilla CCMP1545]	4	147	AP-4 σ4
2	2vgl_S	99.9	6.6e-28	2.3e-32	167.2	141	1	141	gi|303283648|ref	XP_003061115.1	predicted protein [Micromonas pusilla CCMP1545]	4	154	AP-2 σ2
2	2vgl_S	99.6	1.8e-20	6.3e-25	130.3	140	1	140	gi|303289381|ref	XP_003063978.1	predicted protein [Micromonas pusilla CCMP1545]	4	159	AP-3 σ3
2	2vgl_S	99.5	6e-18	2.1e-22	119.7	133	4	136	gi|303281706|ref	XP_003060145.1	predicted protein [Micromonas pusilla CCMP1545]	4	182	ζ-COP
7	2vgl_M	20.9	30	0.0011	32.6	71	3	73	gi|303289861|ref	XP_003064218.1	predicted protein [Micromonas pusilla CCMP1545]	2	634	Mon1

## Sheet: Dictyostelium purpureum
Result no:	pdb info	Prob	E Value	P Value	Score	cols	thstt	thend	GenInfo number	Accession	Name	Repeats	Amino acids	ID
1	2vgl_M	100	0	0	550	407	1	435	gi|330794493|ref	XP_003285313.1	clathrin-adaptor medium chain apm 3 [Dictyostelium purpureum]	6	417	AP-3 μ3
1	2vgl_M	100	0	0	458.6	427	1	435	gi|330796933|ref	XP_003286518.1	hypothetical protein DICPUDRAFT_54317 [Dictyostelium purpureum]	6	481	AP-4 μ4
1	1w63_M	100	0	0	654.8	419	2	422	gi|330803510|ref	XP_003289748.1	AP-2 medium chain [Dictyostelium purpureum]	6	436	AP-2 μ2
1	1w63_M	100	0	0	646	421	1	422	gi|330844920|ref	XP_003294356.1	clathrin-adaptor medium chain apm1 [Dictyostelium purpureum]	6	431	AP-1 μ1
1	1w63_M	99.9	6.7e-27	2.4e-31	217.7	322	54	398	gi|330840243|ref	XP_003292128.1	hypothetical protein DICPUDRAFT_156811 [Dictyostelium purpureum]	4	560	AP-5 μ5
1	1w63_M	99.9	4.2e-32	1.5e-36	249.7	389	1	420	gi|330841751|ref	XP_003292855.1	hypothetical protein DICPUDRAFT_50669 [Dictyostelium purpureum]	6	503	δ-COP
1	2vgl_S	99.3	1e-15	3.5e-20	105.8	135	1	135	gi|330798546|ref	XP_003287313.1	hypothetical protein DICPUDRAFT_151407 [Dictyostelium purpureum]	4	154	TSPOON
1	2vgl_S	75.3	0.7	2.5e-05	36.3	20	3	22	gi|330801526|ref	XP_003288777.1	hypothetical protein DICPUDRAFT_55620 [Dictyostelium purpureum]	4	496	Mon1
1	1w63_Q	65.1	1.7	6e-05	32.4	73	52	124	gi|330794182|ref	XP_003285159.1	hypothetical protein DICPUDRAFT_28941 [Dictyostelium purpureum]	4	255	AP-5 σ5
2	2vgl_S	99.9	2.9e-31	1e-35	183.8	139	1	139	gi|330804414|ref	XP_003290190.1	hypothetical protein DICPUDRAFT_80926 [Dictyostelium purpureum]	4	152	AP-2 σ2
2	2vgl_S	99.8	1.7e-25	6e-30	155.2	141	2	142	gi|330793559|ref	XP_003284851.1	hypothetical protein DICPUDRAFT_28313 [Dictyostelium purpureum]	4	155	AP-1 σ1
2	2vgl_S	99.8	3e-26	1e-30	161	135	1	135	gi|330801728|ref	XP_003288876.1	hypothetical protein DICPUDRAFT_34761 [Dictyostelium purpureum]	4	170	AP-3 σ3
2	2vgl_S	99.7	2.2e-22	7.7e-27	137.6	131	2	136	gi|330798680|ref	XP_003287379.1	hypothetical protein DICPUDRAFT_32359 [Dictyostelium purpureum]	4	140	AP-4 σ4
2	2vgl_S	99.5	7.3e-18	2.6e-22	118.5	137	2	141	gi|330802659|ref	XP_003289332.1	hypothetical protein DICPUDRAFT_80104 [Dictyostelium purpureum]	4	174	ζ-COP
2	2vgl_S	99.5	5.5e-18	1.9e-22	119.2	133	2	135	gi|330846475|ref	XP_003295053.1	hypothetical protein DICPUDRAFT_90943 [Dictyostelium purpureum]	4	174	ζ-COP
4	1w63_Q	84.6	0.19	6.8e-06	43.1	75	3	81	gi|330799115|ref	XP_003287593.1	hypothetical protein DICPUDRAFT_47448 [Dictyostelium purpureum]	4	772
5	2vgl_S	68.3	1.3	4.7e-05	26.1	38	2	39	gi|330844794|ref	XP_003294298.1	hypothetical protein DICPUDRAFT_43221 [Dictyostelium purpureum]	2	67
5	1w63_Q	33.8	12	0.00043	27	47	60	106	gi|330799572|ref	XP_003287817.1	hypothetical protein DICPUDRAFT_78675 [Dictyostelium purpureum]	2	214
7	2vgl_S	94.4	0.0026	9e-08	42.6	90	1	95	gi|330790449|ref	XP_003283309.1	hypothetical protein DICPUDRAFT_74311 [Dictyostelium purpureum]	4	135

## Sheet: Dictyostelium discoideum
Result no:	pdb info	Prob	E Value	P Value	Score	cols	thstt	thend	GenInfo number	Accession	Name	Repeats	Amino acids	ID
1	1w63_M	100	0	0	643.4	421	1	422	gi|66805039|ref	XP_636252.1	hypothetical protein DDB_G0289247 [Dictyostelium discoideum AX4]	6	428	AP-1 μ1
1	2vgl_M	100	0	0	550.4	407	1	435	gi|66816637|ref	XP_642328.1	hypothetical protein DDB_G0277901 [Dictyostelium discoideum AX4]	6	421	AP-3 μ3
1	1w63_M	100	0	0	654.6	419	2	422	gi|66818179|ref	XP_642749.1	clathrin-adaptor medium chain AP-2 [Dictyostelium discoideum AX4]	6	439	AP-2 μ2
1	1w63_M	100	0	0	456.5	417	2	422	gi|66818609|ref	XP_642964.1	hypothetical protein DDB_G0276945 [Dictyostelium discoideum AX4]	6	530	AP-4 μ4
1	1w63_M	99.9	1.3e-30	4.6e-35	241.7	369	1	399	gi|66827039|ref	XP_646874.1	hypothetical protein DDB_G0268702 [Dictyostelium discoideum AX4]	6	540	δ-COP
1	1w63_M	99.8	4.5e-26	1.6e-30	213.2	329	54	397	gi|66811382|ref	XP_639871.1	hypothetical protein DDB_G0285113 [Dictyostelium discoideum AX4]	4	585	AP-5 μ5
1	1w63_M	90.2	0.044	1.6e-06	51	117	1	118	gi|66802432|ref	XP_629998.1	hypothetical protein DDB_G0291768 [Dictyostelium discoideum AX4]	4	563	TCUP
1	2vgl_S	87.7	0.097	3.4e-06	41.1	84	3	87	gi|66812904|ref	XP_640631.1	DUF254 family protein [Dictyostelium discoideum AX4]	4	478	Mon1
1	2vgl_S	85.3	0.17	5.9e-06	36.2	79	48	126	gi|66826883|ref	XP_646796.1	hypothetical protein DDB_G0270428 [Dictyostelium discoideum AX4]	4	229	AP-5 σ5
2	2vgl_S	99.9	9.7e-31	3.4e-35	181.4	140	2	141	gi|166240177|ref	XP_001733048.1	sigma adaptin [Dictyostelium discoideum AX4]	4	154	AP-1σ1
2	2vgl_S	99.9	5.3e-29	1.9e-33	170.8	140	1	140	gi|166240245|ref	XP_636079.2	adaptor-related protein complex 2, sigma 1 subunit [Dictyostelium discoideum AX4]	4	142	AP-2 σ2
2	2vgl_S	99.9	1.1e-26	4e-31	161.2	142	1	142	gi|66815595|ref	XP_641814.1	clathrin-adaptor small chain [Dictyostelium discoideum AX4]	4	156	AP-1σ1
2	2vgl_S	99.9	5.8e-27	2e-31	164.7	140	1	140	gi|66820058|ref	XP_643675.1	sigma adaptin [Dictyostelium discoideum AX4]	4	171	AP-3 σ3
2	2vgl_S	99.7	2.4e-22	8.3e-27	137.3	131	2	136	gi|66811486|ref	XP_639923.1	adapter-related protein complex 4 sigma 1 subunit [Dictyostelium discoideum AX4]	4	139	AP-4 σ4
2	1w63_Q	99.5	1.5e-18	5.1e-23	126.6	137	2	141	gi|66800773|ref	XP_629312.1	hypothetical protein DDB_G0293086 [Dictyostelium discoideum AX4]	4	178	ζ-COP
2	1w63_Q	99.5	7.3e-18	2.5e-22	122.6	136	2	138	gi|66804943|ref	XP_636204.1	longin domain-containing protein [Dictyostelium discoideum AX4]	4	175	ζ-COP
2	2vgl_S	28.1	18	0.00063	25.8	58	2	59	gi|66823493|ref	XP_645101.1	hypothetical protein DDB_G0272488 [Dictyostelium discoideum AX4]	2	256
4	1w63_Q	90.4	0.041	1.4e-06	48.7	115	2	120	gi|66808293|ref	XP_637869.1	hypothetical protein DDB_G0286137 [Dictyostelium discoideum AX4]	4	1009
5	3l81_A	9.5	96	0.0034	21.8	15	29	43	gi|66816333|ref	XP_642176.1	hypothetical protein DDB_G0278165 [Dictyostelium discoideum AX4]	2	100
7	2vgl_S	92.1	0.018	6.3e-07	38.4	89	2	95	gi|66813642|ref	XP_641000.1	trafficking protein particle complex subunit 4 [Dictyostelium discoideum AX4]	4	135
9	2vgl_S	49	5	0.00017	25	39	2	40	gi|166240340|ref	XP_637964.2	cytoplasmic dynein light chain [Dictyostelium discoideum AX4]	2	94

## Sheet: Giardia lamblia
Result no:	pdb info	Prob	E Value	P Value	Score	cols	thstt	thend	GenInfo number	Accession	Name	Repeats	Amino acids	ID
1	2vgl_M	100	0	0	550.1	425	1	434	gi|159115681|ref	XP_001708063.1	Mu adaptin [Giardia lamblia ATCC 50803]	6	434	AP-2 μ2
1	2vgl_M	100	4.4e-38	1.69978e-42	291.7	412	1	422	gi|159117149|ref	XP_001708795.1	Mu adaptin [Giardia lamblia ATCC 50803]	6	448	AP-1 μ1
1	1w63_Q	99.9	7.9e-31	3e-35	186.1	140	1	140	gi|159111182|ref	XP_001705823.1	Sigma adaptin [Giardia lamblia ATCC 50803]	4	141	AP-2 σ2
1	1w63_Q	99.7	7.6e-23	2.9e-27	145.8	143	1	143	gi|159110707|ref	XP_001705601.1	Sigma adaptin [Giardia lamblia ATCC 50803]	4	147	AP-1 σ1
1	1w63_Q	95.8	0.0002	7.7e-09	55.3	146	3	152	gi|159110106|ref	XP_001705315.1	Coatomer delta subunit [Giardia lamblia ATCC 50803]	4	302	δ-COP
2	2vgl_S	96.9	3.7e-06	1.4e-10	58.7	121	3	126	gi|159112637|ref	XP_001706547.1	Coatomer zeta subunit [Giardia lamblia ATCC 50803]	4	159	ζ-COP
4	1i31_A	23.3	23	0.00088	23.3	24	143	166	gi|159119203|ref	XP_001709820.1	Hypothetical protein GL50803_86908 [Giardia lamblia ATCC 50803]	3	66
10	1i31_A	30	15	0.00055	28.7	28	128	156	gi|159113192|ref	XP_001706823.1	Hypothetical protein GL50803_15367 [Giardia lamblia ATCC 50803]	2	196

[truncated: 5 more sheets: Homo sapiens, Saccharomyces cerevisiae, Schizosaccharomyces pombe, Drosophila melanogaster, Caenorhabditis elegans]
