# Supplementary material for: Characterization of TSET, an ancient and widespread membrane trafficking complex
Source: eLife. 2014 May 27;3:e02866. doi: 10.7554/eLife.02866 (PMC4031984; doi:10.7554/eLife.02866)
Supplement: Figure 3—source data 1. — DOI: http://dx.doi.org/10.7554/eLife.02866.018 [file elife-02866-fig3-data1.xlsx]

## Sheet: Sequences
Species	Annotation	Accession	Length
T-SET
TPLATE
Dictyostelium purpureum	DpTPLATE	XP_003286721.1	1279
http://www.ncbi.nlm.nih.gov/
Arabidopsis thaliana	AtTPLATE	NP_186827.2	1176
http://www.ncbi.nlm.nih.gov/
Nagleria gruberi	NgTPLATE	XP_002675144.1	1097
http://www.ncbi.nlm.nih.gov/
Volvox carteri	VcTPLATE	Vocar20013856m	1662
http://www.phytozome.net/
Micromonas pusilla	MpTPLATE	211586	1522
http://www.phytozome.net/
Physcomitrella patens	PpTPLATE1	Pp1s48_204V6.1	1156
Physcomitrella patens	PpTPLATE2	Pp1s7_55V6.1	1157
Physcomitrella patens	PpTPLATE3	Pp1s67_33V6.1	1169
http://www.phytozome.net/
Chlamydomonas reinhardtii	CrTPLATE	Cre12.g497900.t1.3|PACid:27582365	1637
http://www.phytozome.net/
Guillardia theta	GtTPLATE	jgi|Guith1|137731|fgenesh2_pg.27_#_86	1196
http://www.jgi.doe.gov/
Polysphondylium pallidum	PpalTPLATE	EFA76832.1	826
http://www.ncbi.nlm.nih.gov/
Thecamonas trahens	TtrTPLATE	AMSG_05943T0	1032
http://www.broadinstitute.org/
Dictyostelium discoideum	DdTPLATE	XP_639969.1	1408
http://www.ncbi.nlm.nih.gov/
Naegleria fowleri	NfowTPLATEa	Nfow_contig_82-5-75042-72277	896
Naegleria fowleri	NfowTPLATEb	Nfow_contig_82-4-76102-75590	130
http://eupathdb.org/eupathdb/
TSAUCER
Dictyostelium purpureum	DpTSAUCER	XP_003291898.1	873
http://www.ncbi.nlm.nih.gov/
Arabidopsis thaliana	AtTSAUCER	NP_001189515.1	1198
http://www.ncbi.nlm.nih.gov/		NP_178746.2	1196
Nagleria gruberi	NgTSAUCER	XP_002677398.1	780
http://www.ncbi.nlm.nih.gov/
Volvox carteri	VcTSAUCER	Vocar20004385m	1394
http://www.phytozome.net/
Micromonas pusilla	MpTSAUCER	39549	849
http://www.phytozome.net/
Physcomitrella patens	PpTSAUCER	Pp1s206_101V6.1	1179
http://www.phytozome.net/
Chlamydomonas reinhardtii	CrTSAUCER	Cre08.g384864.t1.2|PACid:27563592	1534
http://www.phytozome.net/
Polysphondylium pallidum	PpTSAUCER	EFA80191.1	729
http://www.ncbi.nlm.nih.gov/
Thecamonas trahens	TtrTSAUCER	AMSG_05390T0	1118
http://www.broadinstitute.org/
Ectocarpus siliculosus	EsTSAUCER	Esi0133_0086	1028
http://bioinformatics.psb.ugent.be/
Dictyostelium discoideum	DdTSAUCER	XP_640471.1	877
http://www.ncbi.nlm.nih.gov/
Acanthamoeba castellanii	AcTSAUCER	XP_004354064.1	778
http://www.ncbi.nlm.nih.gov/
Naegleria fowleri	NfowTSAUCER	Nfow_contig_94-4-41854-40172	795
http://eupathdb.org/eupathdb/
TCUP
Dictyostelium discoideum	DdTCUP	XP_629998.1	563
http://www.ncbi.nlm.nih.gov/
Naegleria gruberi	NgTCUP	XP_002671328.1	888
http://www.ncbi.nlm.nih.gov/
Arabidopsis thaliana	AtTCUP	NP_200555.1	646
http://www.ncbi.nlm.nih.gov/
Selaginella moellendorffii	SmTCUP	XP_002983631.1	395
http://www.ncbi.nlm.nih.gov/
Chlamydomonas reinhardtii	CrTCUP	Cre01.g028500.t1.2	609
http://www.phytozome.net/
Physcomitrella patens	PpTCUP	Pp1s412_13V6.1	654
http://www.phytozome.net/
Thecamonas trahens	TtrTCUP	AMSG_09219T0	623
http://www.broadinstitute.org/
Homo sapiens	HsTCUPa	NP_115667.2	828
Homo sapiens	HsTCUPb	NP_001154829.1	891
Homo sapiens	HsTCUPc	NP_620137.2	810
http://www.ncbi.nlm.nih.gov/
Ectocarpus siliculosus	EsTCUP	Esi0101_0029	694
http://bioinformatics.psb.ugent.be/
Capsaspora owczarzaki	CoTCUP	CAOG_00351T0	920
http://www.broadinstitute.org/
Drosophila melanogaster	DmTCUP	NP_001097723.1	1220
http://www.ncbi.nlm.nih.gov/
Sphaeroforma arctica	SaTCUP	SARC_05294T0	1069
http://www.broadinstitute.org/
Spizellomyces punctatus	SpuTCUP	SPPG_06558T0	706
http://www.broadinstitute.org/
Neurospora crassa	NcTCUP	jgi|Neucr1|3877|NCU04427T0	885
http://www.jgi.doe.gov/
Ustilago maydis	UmTCUP	jgi|Ustma1|2358|UM02358	927
http://www.jgi.doe.gov/
Rhizopus delemar	RoTCUPa	RO3T_10107 | RO3G_10108	638
Rhizopus delemar	RoTCUPb	RO3T_15339 | RO3G_15340	586
http://www.broadinstitute.org/
Batrachochytrium dendrobatidis	BdTCUP	jgi|Batde5|90049|GP3.056080	636
http://www.jgi.doe.gov/
Monosiga brevicollis	MbTCUP	jgi|Monbr1|32093|estExt_fgenesh2_pg.C_70300	481
http://www.jgi.doe.gov/
Schizosaccharomyces pombe	SpTCUP	NP_596299.1	818
http://www.ncbi.nlm.nih.gov/
Cryptococcus neoformans	CnTCUP	XP_567784.1	881
http://www.ncbi.nlm.nih.gov/
Cyanophora paradoxa	CpTCUP	ConsensusfromContig8874	138
http://cyanophora.rutgers.edu/
Emiliania huxleyi	EhTCUP	jgi|Emihu1|277941|estExt_Genemark1.C_280310	533
http://www.jgi.doe.gov/
Thalassiosira pseudonana	TpTCUP	jgi|Thaps3|25419|estExt_fgenesh1_pg.C_chr_180255	1269
http://www.jgi.doe.gov/
Dictyostelium purpureum	DpTCUP	DPU0040472	513
Naegleria fowleri	NfTCUPa	Nfow_contig_105-6-147970-145268	759
Naegleria fowleri	NfTCUPb	Nfow_contig_105-6-147970-145268	651
http://eupathdb.org/eupathdb/
Polysphondylium pallidum	PpalTCUP	PPA1340034 (contig)	379
http://www.ncbi.nlm.nih.gov/
Saccharomyces cerevisiae	ScerTCUP	NP_009959.2	870
http://www.ncbi.nlm.nih.gov/
Ustilago myadis	UmayTCUP	XP_758505.1	927
http://www.ncbi.nlm.nih.gov/
TSPOON
Dictyostelium purureum	DpTSPOON	XP_003287313.1	154
http://www.ncbi.nlm.nih.gov/
Arabidopsis thaliana	AtTSPOON	NP_172989.1	147
http://www.ncbi.nlm.nih.gov/
Nagleria gruberi	NgTSPOON	XP_002673133.1	222
http://www.ncbi.nlm.nih.gov/
Volvox carteri	VcTSPOON	Vocar20009777m	152
http://www.phytozome.net/
Micromonas pusilla	MpTSPOON	57529	207
http://www.phytozome.net/
Physcomitrella patens	PpTSPOON	Pp1s3_632V6.1	147
http://www.phytozome.net/
Cyanophora paradoxa	CpTSPOON	ConsensusfromContig25596	148
http://cyanophora.rutgers.edu/
Chlamydomonas reinhardtii	CrTSPOON	Cre12.g561200.t1.1|PACid:27582536	152
http://www.phytozome.net/
Polysphondylium pallidum	PpTSPOON	EFA77406.1	152
http://www.ncbi.nlm.nih.gov/
Thecamonas trahens	TtrTSPOON	AMSG_06373T0	150
http://www.broadinstitute.org/
Phytophthora sojae	PsTSPOON	jgi|Physo3|482095|e_gw1.2.13264.1	159
http://www.jgi.doe.gov/
Ectocarpus siliculosus	EsTSPOON	Esi0120_0060	194
http://bioinformatics.psb.ugent.be/
Dictyostelium discoideum	DdTSPOON	DDB_G0350235	733
Acanthamoeba castellanii	AcTSPOON	XP_004337824.1	200
http://www.ncbi.nlm.nih.gov/
Naegleria fowleri	NfowTSPOON	Nfow_contig_131-4-29745-28978	225
http://eupathdb.org/eupathdb/
TTRAY1
Dictyostelium discoideum	DdisTTRAY1	Q54YB3/XP_642289.1	1340
http://www.ncbi.nlm.nih.gov/
Arabidopsis thaliana	AthaTTRAY1	NP_190628.6	1614
http://www.ncbi.nlm.nih.gov/
Dictyostelium purpureum	DpurTTRAY1	XP_003287680.1	1278
http://www.ncbi.nlm.nih.gov/
Acanthamoeba castellanii	AcaTTRAY1	XP_004353465.1	959
http://www.ncbi.nlm.nih.gov/
Polysphondylium pallidum	PpalTTRAY1	EFA86517.1	1299
http://www.ncbi.nlm.nih.gov/
Thecamonas trahens	TtraTTRAY1	AMSG_08110T0	1775
http://www.broadinstitute.org/
Physcomitrella patens	PpatTTRAY1a	jgi|Phypa1_1|124044|e_gw1.47.20.1	1591
Physcomitrella patens	PpatTTRAY1b	jgi|Phypa1_1|71167|fgenesh1_pg.scaffold_31000119	662
http://www.jgi.doe.gov/
Guillardia theta	GtheTTRAY1	jgi|Guith1|110128|au.43_g11230	1345
http://www.jgi.doe.gov/
Phytophthora sojae	PsojTTRAY1	jgi|Physo3|481754|e_gw1.2.10394.1	1513
http://www.jgi.doe.gov/
Paramecium tetraurelia	PtetTTRAY1a	GSPATP00020699001	808
Paramecium tetraurelia	PtetTTRAY1b	GSPATP00021984001	807
Paramecium tetraurelia	PtetTTRAY1c	GSPATP00020698001	924
Paramecium tetraurelia	PtetTTRAY1d	GSPATP00021985001	943
http://paramecium.cgm.cnrs-gif.fr/
Cyanidioschyzon merolae	CmerTTRAY1	gnl|CMER|CMK109C	1123
http://merolae.biol.s.u-tokyo.ac.jp/
Tetrahymena thermophila	TtheTTRAY1	3712.m00018	1613
http://ciliate.org/
Volvox carteri	VcarTTRAY1	XP_002948805.1	1711
http://www.ncbi.nlm.nih.gov/
TTRAY2
Dictyostelium discoideum	DdisTTRAY2	Q54K14/XP_637150.1	1122
http://www.ncbi.nlm.nih.gov/
Arabidopsis thaliana	AthaTTRAY2	NP_197859.4	1377
http://www.ncbi.nlm.nih.gov/
Naegleria gruberi	NgruTTRAY2	jgi|Naegr1|68453|fgeneshNG_pg.scaffold_28000146	1072
http://www.jgi.doe.gov/
Dictyostelium purpureum	DpurTTRAY2	XP_003287023.1	1072
http://www.ncbi.nlm.nih.gov/
Acanthamoeba castellanii	AcanTTRAY2	XP_004353514.1	953
http://www.ncbi.nlm.nih.gov/
Polysphondylium pallidum	PpalTTRAY2a	EFA84812.1	423
Polysphondylium pallidum	PpalTTRAY2b	EFA84813.1	373
http://www.ncbi.nlm.nih.gov/
Thecamonas trahens	TtraTTRAY2	AMSG_05247T0	1083
http://www.broadinstitute.org/
Naegleria fowleri	NfloTTRAY2	Nfow_contig_6-4-133854-132295	1051
http://eupathdb.org/eupathdb/
Cyanophora pardoxa	CparTTRAY2a	ConsensusfromContig15957-snap_masked-ConsensusfromContig15957-abinit-gene-0.0-mRNA-1:cds:4881/29-98:0:-	87
Cyanophora paradoxa	CparTTRAY2b	ConsensusfromContig39818-snap_masked-ConsensusfromContig39818-abinit-gene-0.0-mRNA-1:cds:8860/46-187:0:-	313
http://cyanophora.rutgers.edu/
Physcomitrella patens	PpatTTRAY2	jgi|Phypa1_1|205506|estExt_Genewise1.C_280079	1169
http://www.jgi.doe.gov/
Volvox carteri	VcarTTRAY2	Vocar20011164m|PACid:23127363	1190
http://www.phytozome.net/
Chlamydomonas reinhardtii	CreiTTRAY2	Cre12.g535350.t1.2|PACid:27582837	1244
http://www.phytozome.net/
Phytophthora sojae	PsojTTRAY2	jgi|Physo3|486785|e_gw1.2.10409.1	1181
http://www.jgi.doe.gov/
Thalassiosira pseudonana	TpseTTRAY2	jgi|Thaps3|23051|estExt_fgenesh1_pg.C_chr_60216	1410
http://www.jgi.doe.gov/
Paramecium tetraurelia	PtetTTRAY2	GSPATP00006070001	916
http://paramecium.cgm.cnrs-gif.fr/
Tetrahymena thermophila	TtheTTRAY2	3824.m02983	1055
http://ciliate.org/
Guillardia theta	GtheTTRAY2	jgi|Guith1|133576|fgenesh2_pg.8_#_72	706
http://www.jgi.doe.gov/
COPI
COPI GAMMA
Homo sapiens	HsaCOPG1	NP_057212.1
Homo sapiens	HsaCOPG2	NP_036265.3
Acanthamoeba castellanii	AcaCOPG	XP_004341555.1
Allomyces macrogynnus	AmacCOPG1	AMAG_10958T0
Allomyces macrogynnus	AmacCOPG2	AMAG_11555T0
Arabidopsis thaliana	AthCOPG	NP_195171.2
Batrachochytrium dendrobatidis	BdenCOPG	jgi|Batde5|35627|estExt_fgenesh1_pg.C_100062
Bigelowiella natans	BnatCOPG	jgi|Bigna1|92944|estExt_fgenesh1_pm.C_1090003
Bodo saltans	BsalCOPG	BS62870
Capsaspora woczarzaki	CowcCOPG	CAOG_04033T0
Cyanidioschyzon merolae	CmerCOPG	gnl|CMER|CMP053C
Cryptococcus neoformans	CneoCOPG	XP_570632.1
Cyanophora paradoxa	CparCOPG	ConsensusfromContig8894
Chlamydomonas reinhardtii	CreiCOPG	Cre06.g310750.t1.2
Drosophila melanogaster	DmelCOPG	NP_733432.1
Dictyostelium purpureum	DpurCOPG	XP_003284402.1
Ectocarpus siliculosus	EsilCOPG1	Esi0107_0035
Ectocarpus siliculosus	EsilCOPG2	Esi0107_0036
Encephalitozoon cuniculi	EcunCOPG	NP_597538.1
Emiliania huxleyi	EhuxCOPG	jgi|Emihu1|454160|estExtDG_Genemark1.C_1030074
Guillardia theta	GtheCOPG	jgi|Guith1|157167|fgenesh2_pm.10_#_30
Leishmania major	LmCOPG	LmjF.28.2620
Monosiga brevicollis	MbreCOPG	jgi|Monbr1|17262|estExt_gwp_gw1.C_20605
Micromonas pusilla	MpusCOPG	25003|PACid:27342657
Nannochloropsis gaditana	NgadCOPG	Nga30240
Nosema ceranae	NcerCOPG	XP_002995851.1
Naegleria gruberi	NgruCOPG	jgi|Naegr1|59819|estExt_fgeneshHS_pg.C_770012
Neurospora crassa	NcraCOPG	jgi|Neucr1|1735|NCU01992T0
Entamoeba histolytica	EhisCOPG1	EHI_040700
Entamoeba histolytica	EhisCOPG2	EHI_012500
Ostreococcus tauri	OtauCOPG	jgi|Ostta4|15713|e_gw1.02.00.57.1
Paramecium tetraurelia	PtetCOPG1	GSPATP00017150001
Paramecium tetraurelia	PtetCOPG2	GSPATP00018566001
Plasmodium falciparum	PfalCOPG	PF3D7_1145100
Perkinsus marinus	PmarCOPG	XP_002785344.1
polysphondylium pallidum	PpalCOPG	EFA81100.1
Physcomitrella patens	PpatCOPG1	jgi|Phypa1_1|171134|estExt_fgenesh1_pg.C_2760058
Physcomitrella patens	PpatCOPG2	jgi|Phypa1_1|116128|e_gw1.15.320.1
Physcomitrella patens	PpatCOPG3	jgi|Phypa1_1|162270|estExt_fgenesh1_pg.C_410095
Physcomitrella patens	PpatCOPG4	jgi|Phypa1_1|163225|estExt_fgenesh1_pg.C_530113
Phytophthora sojae	PsojCOPG	jgi|Physo3|537097|estExt_Genewise1.C_1_t110354
Rhizopus delemar	RdelCOPG1	RO3G_04403
Rhizopus delemar	RdelCOPG2	RO3G_05583
Rhizopus delemar	RdelCOPG3	RO3G_10502
Saccharomyces cerevisiae	ScerCOPG	NP_014112.1
Sphaeroforma arctica	SarcCOPG1	SARC_13027T0
Sphaeroforma arctica	SarcCOPG2	SARC_13222T0
Sphaeroforma arctica	SarcCOPG3	SARC_14876T0
Spizellomyces punctatus	SpunCOPG	SPPG_00612T0
Schizosaccharomyces pombe	SpomCOPG	NP_593371.1
Trypanosoma brucei	TbruCOPG	Tb11.01.3740
Toxoplasma gondii	TgonCOPG1	TGME49_273370
Toxoplasma gondii	TgonCOPG2	TGME49_303450
Thecamonas trahens	TtraCOPG	AMSG_09493T0
Thalassiosira pseudonana	TpseCOPG	jgi|Thaps3|269663|estExt_thaps1_ua_kg.C_chr_130031
Tridhomonas vaginalis	TvagCOPG1	TVAG_335370
Tridhomonas vaginalis	TvagCOPG2	TVAG_566060
Tridhomonas vaginalis	TvagCOPG3	TVAG_566080
Tridhomonas vaginalis	TvagCOPG4	TVAG_015420
Tridhomonas vaginalis	TvagCOPG5	TVAG_103850
Tridhomonas vaginalis	TvagCOPG6	TVAG_472880
Ustilago maydis	UmayCOPG	jgi|Ustma1|768|UM00768
Danio rerio	DrerCOPG	NP_571069.1
Volvox carteri	VcarCOPG	Vocar20008113m
Dictyostelium discoideum	DdisCOPG	XP_636291.1
Nematostella vectensis	NvecCOPG	XP_001632631.1
Tetrahymena thermophila	TtheCOPG	XP_001023294.2
COPI ZETA
Homo sapiens	HsaCOPZ1	NP_001258665.1
Homo sapiens	HsaCOPZ2	XP_005257487.1
Acanthamoeba catellanii	AcanCOPZ1	XP_004335390.1
Acanthamoeba catellanii	AcanCOPZ2	XP_004334521.1
Acanthamoeba catellanii	AcanCOPZ3	XP_004334050.1
Allomyces macrogynus	AmacCOPZ1	AMAG_13989T0
Allomyces macrogynus	AmacCOPZ2	AMAG_17270T0
Arabidopsis thaliana	AthaCOPZ1	NP_566358.3
Arabidopsis thaliana	AthaCOPZ2	NP_564767.1
Arabidopsis thaliana	AthaCOPZ3	NP_567337.1
Bigelowiella natans	BnatCOPZ	jgi|Bigna1|88960|estExt_fgenesh1_pg.C_410072
Batrachochytrium dendrobatidis	BdenCOPZ	jgi|Batde5|23976|fgenesh1_pg.C_scaffold_4000215
Bodo saltans	BsalCOPZ	BS34545
Capsaspora owczarzaki	CowcCOPZ	CAOG_07917T0
Cyanidioschyzon merolae	CmerCOPZ	gnl|CMER|CMN247C
Cryptococcus neoformans	CneoCOPZ	XP_569309.1
Cyanophora paradoxa	CparCOPZ	ConsensusfromContig37318
Chlamydomonas reinhardtii	CreiCOPZ	Cre08.g371450.t2.1
Drosophila melanogaster	DmelCOPZ	NP_648910.1
Dictyostelium purpureum	DpurCOPZ1	XP_003295053.1
Dictyostelium purpureum	DpurCOPZ2	XP_003287313.1
Dictyostelium purpureum	DpurCOPZ3	XP_003289332.1
Ectocarpus siliculosus	EsilCOPZ1	Esi0054_0065
Ectocarpus siliculosus	EsilCOPZ2	Esi0120_0060
Entamoeba histolytica	EhisCOPZ	EHI_122850
Emiliania huxelyi	EhuxCOPZ	jgi|Emihu1|57758|gw1.50.98.1
Giardia intestinalis	GintCOPZ	GL50581_4411
Guillardia theta	GtheCOPZ	jgi|Guith1|152061|fgenesh2_kg.26_#_2_#_3956_1_CCFI_CCFN_EXTA_EXTB
Leishmania major	LmajCOPZ	LmjF.35.0110
Monosiga brevicollis	MbreCOPZ	jgi|Monbr1|37291|estExt_fgenesh1_pg.C_120057
Micromonas pusilla	MpusCOPZ	157310|PACid:27340695
Nannochloropsis gaditana	NgadCOPZ	Nga01298
Neurospora crassa	NceCOPZ	jgi|Neucr1|2220|NCU02538T0
Ostreococcus tauri	OtauCOPZ	jgi|Ostta4|27738|estExt_gwp_GeneWisePlus.C_Chr_02.00010511
Paramecium tetraurelia	PtetCOPZ	GSPATP00004140001
Plasmodium falciparum	PfalCOPZ	PF3D7_0415400
Polysphondylium pallidum	PpalCOPZ1	EFA83978.1
Polysphondylium pallidum	PpalCOPZ2	EFA77406.1
Polysphondylium pallidum	PpalCOPZ3	EFA75863.1
Physcomitrella patens	PpatCOPZ1	jgi|Phypa1_1|202190|estExt_Genewise1.C_80080
Physcomitrella patens	PpatCOPZ2	jgi|Phypa1_1|175584|estExt_gwp_gw1.C_130148
Physcomitrella patens	PpatCOPZ3	jgi|Phypa1_1|174107|estExt_gwp_gw1.C_30487
Physcomitrella patens	PpatCOPZ4	jgi|Phypa1_1|128958|e_gw1.73.67.1
Physcomitrella patens	PpatCOPZ5	jgi|Phypa1_1|182417|estExt_gwp_gw1.C_560171
Phytophthora sojae	PsojCOPZ	jgi|Physo3|354829|estExt_fgenesh1_kg.C_50245
Rhizopus oryzae	RoryCOPZ	RO3G_06265
Sacchromyces cerevisiae	ScerCOPZ	NP_015315.1
Sphaeroforma arctica	SarcCOPZ	SARC_06591T0
Spizellomyces punctatus	SpunCOPZ	SPPG_03376T0
Schizosaccharomyces pombe	SpomCOPZ	NP_588434.1
Trypanosoma brucei	TbruCOPZ	Tb927.10.4270
Toxoplasma gondii	TgonCOPZ	TGME49_280550
Thecamonas trahens	TtraCOPZ	AMSG_02723T0
Thalassiosira pseudonana	TpseCOPZ	jgi|Thaps3|23050|estExt_fgenesh1_pg.C_chr_60215
Trichomonas vaginalis	TvagCOPZ	TVAG_121700
Ustilago maydis	UmayCOPZ	jgi|Ustma1|5640|UM05640
Volvox carteri	VcarCOPZ	Vocar20003812m
COPI ALPHA
Homo sapiens	HsapCOPIa	NP_001091868.1
Danio rerio	DrerCOPIa	NP_001001941.2
Nematostella vectensis	NvecCOPIa	jgi|Nemve1|187173|estExt_GenewiseH_1.C_960094
Monosiga brevicollis	MbreCOPIa	jgi|Monbr1|17562|estExt_gwp_gw1.C_30205
Batrachochytrium dendrobatidis	BdenCOPIa	jgi|Batde5|32736|estExt_fgenesh1_pm.C_10216
Saccharomyces cerevisiae	ScerCOPIa	NP_010136.1
Schizosaccharomyces pombe	SpomCOPIa	NP_595279.1
Rhizopus oryzae	RoryCOPIa1	RO3G_00707
Rhizopus oryzae	RoryCOPIa2	RO3G_05487
Cryptococcus neoformans	CneoCOPIa	XP_571751.1
Dictyostelium discoideum	DdsiCOPIa	DDB0233797
Entamoeba histolytica	EhisCOPIa1	EHI_088090
Entamoeba histolytica	EhisCOPIa2	EHI_118050
Trichomonas vaginalis	TvagCOPIa1	TVAG_319470
Trichomonas vaginalis	TvagCOPIa2	TVAG_270990
Trichomonas vaginalis	TvagCOPIa3	TVAG_015520
Trichomonas vaginalis	TvagCOPIa4	TVAG_198900
Giardia intestinalis	GintCOPIa	GL50581_330
Trypanosoma brucei	TbruCOPIa	Tb927.4.450
Leishmania major	LmajCOPIa	LmjF.34.4310
Naegleria gruberi	NgruCOPIa	jgi|Naegr1|83066|estExt_fgeneshNG_pm.C_150014
Arabidopsis thaliana	AthaCOPIa1	NP_179734.1
Arabidopsis thaliana	AthaCOPIa2	NP_176393.1
Physcomitrella patens	PpatCOPIa1	jgi|Phypa1_1|213150|estExt_Genewise1.C_860093
Physcomitrella patens	PpatCOPIa2	jgi|Phypa1_1|175161|estExt_gwp_gw1.C_110068
Physcomitrella patens	PpatCOPIa3	jgi|Phypa1_1|216895|estExt_Genewise1.C_1350030
Chlamydomonas reinhardtii	CreiCOPIa	Cre13.g565850.t1.3|PACid:27574136
Ostreococcus tauri	OtauCOPIa	jgi|Ostta4|22803|estExt_fgenesh1_pm.C_Chr_04.00010020
Volvox carteri	VcarCOPIa	Vocar20014715m|PACid:23135543
Toxoplasma gondii	TgonCOPIa	TGME49_240650
Plasmodium falciparum	PfalCOPIa	PF3D7_0606700
Tetrahymena thermophila	TtheCOPIa	TTHERM_01345820
Phytophthora sojae	PsojCOPIa	jgi|Physo3|545018|estExt_Genewise1.C_4_t60258
Thalassiosira pseudonana	TpseCOPIa	jgi|Thaps3|34876|e_gw1.6.11.1
Emiliania huxleyi	EhuxCOPIa	jgi|Emihu1|422598|estExtDG_fgenesh_newKGs_pm.C_800018
Ectocarpus siliculosus	EsilCOPIa	Esi0036_0017
Bigelowiella natans	BnatCOPIa	jgi|Bigna1|45669|e_gw1.136.2.1
COPI BETA'
Homo sapiens	HsapCOPIBp	NP_004757.1
Danio rerio	DrerCOPIBp	NP_001001940.1
Nematostella vectensis	NvecCOPIBp	jgi|Nemve1|239070|estExt_fgenesh1_pg.C_110137
Monosiga brevicollis	MbreCOPIBp	jgi|Monbr1|39343|estExt_fgenesh1_pg.C_500022
Batrachochytrium dendrobatidis	BdenCOPIBp1	jgi|Batde5|35513|estExt_fgenesh1_pg.C_90109
Batrachochytrium dendrobatidis	BdenCOPIBp2	jgi|Batde5|18190|estExt_Genewise1Plus.C_10101
Saccharomyces cerevisiae	ScerCOPIBp	NP_011378.1
Schizosaccharomyces pombe	SpomCOPIBp	XP_001713153.1
Rhizopus oryzae	RoryCOPIBp	RO3G_06160
Cryptococcus neoformans	CneoCOPIBp	XP_569300.1
Dictyostelium discoideum	DdisCOPIBp	DDB0233798
Entamoeba histolytica	EhisCOPIBp1	EHI_004590
Trichomonas vaginalis	TvagCOPIBp1	TVAG_191610
Trichomonas vaginalis	TvagCOPIBp2	TVAG_488010
Trichomonas vaginalis	TvagCOPIBp3	TVAG_038030
Giardia intestinalis	GintCOPIBp	GL50581_1195
Trypanosoma brucei	TbruCOPIBp	Tb927.2.6050
Leishmania major	LmajCOPIBp	LmjF.33.3210
Naegleria gruberi	NgruCOPIBp1	jgi|Naegr1|60087|estExt_fgeneshHS_pg.C_4830001
Naegleria gruberi	NgruCOPIBp2	jgi|Naegr1|75281|fgeneshNG_pg.scaffold_79000008
Naegleria gruberi	NgruCOPIBp3	jgi|Naegr1|80396|estExt_fgeneshNG_pg.C_350117
Arabidopsis thaliana	AthaCOPIBp1	NP_001189908.1
Arabidopsis thaliana	AthaCOPIBp2	NP_178116.5
Arabidopsis thaliana	AthaCOPIBp3	NP_001185203.1
Physcomitrella patens	PpatCOPIBp1	jgi|Phypa1_1|146433|e_gw1.243.7.1
Physcomitrella patens	PpatCOPIBp2	jgi|Phypa1_1|164902|estExt_fgenesh1_pg.C_790099
Physcomitrella patens	PpatCOPIBp3	jgi|Phypa1_1|64305|fgenesh1_pg.scaffold_2000182
Physcomitrella patens	PpatCOPIBp4	jgi|Phypa1_1|210315|estExt_Genewise1.C_610001
Chlamydomonas reinhardtii	CreiCOPIBp	Cre02.g118500.t1.3|PACid:27574922
Ostreococcus tauri	OtauCOPIBp	jgi|Ostta4|9400|fgenesh1_pg.C_Chr_01.0001000166
Volvox carteri	VcarCOPIBp	Vocar20003617m|PACid:23126902
Toxoplasma gondii	TgonCOPIBp	TGME49_235020
Plasmodium falciparum	PfalCOPIBp	PF3D7_0905900
Tetrahymena thermophila	TtheCOPIBp	TTHERM_00476510
Phytophthora sojae	PsojCOPIBp	jgi|Physo3|541161|estExt_Genewise1.C_2_t40469
Thalassiosira pseudonana	TpseCOPIBp	jgi|Thaps3|22092|estExt_fgenesh1_pg.C_chr_40071
Emiliania huxleyi	EhuxCOPIBp	jgi|Emihu1|353339|fgenesh_newKGs_kg.20__185__2692689:1
Ectocarpus siliculosus	EsilCOPIBp1	Esi0482_0020
Ectocarpus siliculosus	EsilCOPIBp2	Esi0482_0024
Bigelowiella natans	BnatCOPIBp	jgi|Bigna1|74452|fgenesh1_pg.29_#_61
Bigelowiella natans	BnatCOPIBp	jgi|Bigna1|74452|fgenesh1_pg.29_#_61
COPI BETA
Homo sapiens	HsapCOPB	NP_057535.1
Danio rerio	DrerCOPB	NP_001002013.1
Nematostella vectensis	NvecCOPB	XP_001627074.1
Batrachochytrium dendrobatidis	BdenCOPB	BDEG_04398
Monosiga brevicollis	MbreCOPB	XP_001748646.1
Saccharomyces cerevisiae	ScerCOPB	NP_010524.1
Schizosaccharomyces pombe	SpomCOPB	NP_595403.1
Rhizopus oryzae	RoryCOPB	RO3G_09097.3
Cryptococcus neoformans	CneoCOPB	XP_571941.1
Dictyostelium discoideum	DdisCOPB	XP_638375.1
Trichomonas vaginalis	TvagCOPB	XP_001581105.1
Trypanosoma brucei	TbruCOPB	XP_001218956.1
Leishmania major	LmajCOPB	XP_001682887.1
Naegleria gruberi	NgruCOPB	XP_002673194.1
Arabidopsis thaliana	AthaCOPB	NP_194877.2
Physcomitrella patens	PpatCOPB	XP_001760433.1
Chlamydomonas reinhardtii	CreiCOPB	XP_001701255.1
Volvox carteri	VcarCOPB	XP_002956719.1
Toxoplasma gondii	TgonCOPB	EEE27793.1
Tetrahymena thermophila	TtheCOPB	XP_001016810.2
Phytophthora sojae	PsojCOPB	108280
Thalassiosira pseudonana	TpseCOPB	XP_002289476.1
Emiliania huxleyi	EhuxCOPB	464809
Ectocarpus siliculosus	EsilCOPB	CBJ27676
Bigelowiella natans	BnatCOPB	87120
COPI DELTA
Homo sapiens	HsapCOPD	NP_001646.2
Danio rerio	DrerCOPD	NP_958867.1
Nematostella vectensis	NvecCOPD	XP_001625768.1
Batrachochytrium dendrobatidis	BdenCOPD	BDEG_05788.1
Monosiga brevicollis	MbreCOPD	XP_001745669.1
Saccharomyces cerevisiae	ScerCOPD	NP_116709.1
Schizosaccharomyces pombe	SpomCOPD	NP_588336.1
Rhizopus oryzae	RoryCOPD	RO3G_05235.3
Cryptococcus neoformans	CneoCOPD	XP_570156.1
Dictyostelium discoideum	DdisCOPD	XP_646874.1
Trichomonas vaginalis	TvagCOPD	XP_001314829.1
Trypanosoma brucei	TbruCOPD	XP_847355.1
Leishmania major	LmajCOPD	XP_001682199.1
Naegleria gruberi	NgruCOPD	XP_002679463.1
Arabidopsis thaliana	AthaCOPD	AAK96849.1
Physcomitrella patens	PpatCOPD	XP_001760678.1
Chlamydomonas reinhardtii	CreiCOPD	XP_001701763.1
Volvox carteri	VcarCOPD	XP_002946549.1
Toxoplasma gondii	TgonCOPD	EEE30147.1
Tetrahymena thermophila	TtheCOPD	XP_001025080.1
Phytophthora sojae	PsojCOPD	133424
Thalassiosira pseudonana	TpseCOPD	XP_002287438.1
Emiliania huxleyi	EhuxCOPD	99536
Ectocarpus siliculosus	EsilCOPD	CBJ25720.1
Bigelowiella natans	BnatCOPD	69347
Adaptins
AP Beta
Homo sapiens	Hsap1B1	Q10567
Homo sapiens	Hsap2B	P63010
Homo sapiens	Hsap3B1	O00203
Homo sapiens	Hsap3B2	Q13367
Homo sapiens	Hsap4B1	Q9Y6B7
Homo sapiens	Hsap5B	NP_612377.3
Danio rerio	Drer1B1	OTTDARP00000016421
Danio rerio	Drer2B	OTTDARP00000035303
Danio rerio	Drer3B2	AAI55651.1
Danio rerio	Drer4B1	OTTDARP00000033514
Danio rerio	Drer5B	XP_001919254.1
Nematostella vectensis	Nvec1B1	190491
Nematostella vectensis	Nvec3B2	134675
Nematostella vectensis	Nvec4B1	40263
Nematostella vectensis	Nvec5B	XP_001641289.1
Batrachochytrium dendrobatidis	Bden2B	BDEG_05210
Batrachochytrium dendrobatidis	Bden2B1	BDEG_05238
Batrachochytrium dendrobatidis	Bden3B1	BDEG_03803
Monosiga brevicollis	Mbre1B1	12202
Monosiga brevicollis	Mbre3B2	17332
Monosiga brevicollis	Mbre4B1	16817
Salpingoeca sp. ATCC 50818	Salpi5B	EGD82999.1
Saccharomyces cerevisiae	Scer2B	SGDID:S000001618
Saccharomyces cerevisiae	Scer2B1	SGDID:S000003765
Saccharomyces cerevisiae	Scer3B2	SGDID:S000003493
Schizosaccharomyces pombe	Spom2B	SPBC947_02
Schizosaccharomyces pombe	Spom2B1	SPBC2G2_06c
Schizosaccharomyces pombe	Spom3B2	SPAC23H3_06
Rhizopus oryzae	Rory1B1	RO3G_00473
Rhizopus oryzae	Rory2B	RO3G_10314
Rhizopus oryzae	Rory3B2	RO3G_03499
Cryptococcus neoformans	Cneo2B	CNAG_05248
Cryptococcus neoformans	Cneo2B1	CNAG_03928
Cryptococcus neoformans	Cneo3B2	CNAG_01543
Dictyostelium discoideum	Ddis1B1	DDB_G0279141
Dictyostelium discoideum	Ddis3B2	DDB_G0274003
Dictyostelium discoideum	Ddis3B1	DDB_G0272578
Dictyostelium discoideum	Ddis4B1	DDB_G0283319
Dictyostelium discoideum	Ddis5B	XP_640040.1
Entamoeba histolytica	Ehis2B	EHI_013040
Entamoeba histolytica	Ehis2B1	EHI_023600
Entamoeba histolytica	Ehis2B2	EHI_058450
Entamoeba histolytica	Ehis2B3	EHI_081400
Entamoeba histolytica	Ehis3B2	EHI_083430
Entamoeba histolytica	Ehis5B	XP_655623.1
Trichomonas vaginalis	Tvag2B1	TVAG_373190
Trichomonas vaginalis	Tvag2B2	TVAG_477740
Trichomonas vaginalis	Tvag2B3	TVAG_055150
Trichomonas vaginalis	Tvag2B4	TVAG_430250
Trichomonas vaginalis	Tvag2B5	TVAG_456570
Trichomonas vaginalis	Tvag2B6	TVAG_397260
Trichomonas vaginalis	Tvag2B7	TVAG_287780
Trichomonas vaginalis	Tvag2B8	TVAG_136530
Trichomonas vaginalis	Tvag2B9	TVAG_439460
Trichomonas vaginalis	Tvag2B11	TVAG_237070
Trichomonas vaginalis	Tvag2B12	TVAG_280470
Trichomonas vaginalis	Tvag2B13	TVAG_006350
Trichomonas vaginalis	Tvag2B14	TVAG_267630
Trichomonas vaginalis	Tvag2B10/Tvag2B15	TVAG_021050
Trichomonas vaginalis	Tvag3B1	TVAG_437420
Trichomonas vaginalis	Tvag3B2	TVAG_390490
Trichomonas vaginalis	Tvag3B3	TVAG_492750
Trichomonas vaginalis	Tvag3B4	TVAG_083310
Trichomonas vaginalis	Tvag3B5	TVAG_050470
Trichomonas vaginalis	Tvag3B6	TVAG_343480
Trichomonas vaginalis	Tvag3B7	TVAG_038150
Trichomonas vaginalis	Tvag4B1	TVAG_472690
Trichomonas vaginalis	Tvag5B	XP_001579610.1
Giardia intestinalis	Gint2B	GL50803_21423
Giardia intestinalis	Gint2B1	GL50803_15339
Trypanosoma brucei	Tbru2B	Tb927.10.9230
Trypanosoma brucei	Tbru2B1	Tb927.10.8040
Trypanosoma brucei	Tbru3B2	Tb11.01.2420
Leishmania major	Lmaj1B1	LmjF36.6770
Leishmania major	Lmaj2B	LmjF11.0990
Leishmania major	Lmaj3B2	LmjF36.5260
Leishmania major	Lmaj1B2	LmjF36.5595
Naegleria gruberi	Ngru2B	80581
Naegleria gruberi	Ngru3B2	372
Naegleria gruberi	Ngru4B1	503
Naegleria gruberi	Ngru5B	XP_002677583.1
Arabidopsis thaliana	Atha1B1	AT4G11380.1
Arabidopsis thaliana	Atha1B11	AT4G23460.1
Arabidopsis thaliana	Atha2B	AT5G11490.1
Arabidopsis thaliana	Atha3B2	AT3G55480.2
Arabidopsis thaliana	Atha5B	NP_188621.1
Physcomitrella patens	Ppat1B1	224233
Physcomitrella patens	Ppat1B11	225918
Physcomitrella patens	Ppat1B12	105637
Physcomitrella patens	Ppat2B	189362
Physcomitrella patens	Ppat3B2	183108
Physcomitrella patens	Ppat5B	XP_001753719.1
Chlamydomonas reinhardtii	Crei2B	195449
Chlamydomonas reinhardtii	Crei2B1	393988
Ostreococcus tauri	Otau2B	16632
Ostreococcus tauri	Otau2B1	31150
Ostreococcus tauri	Otau3B1	20221
Volvox carteri	Vcar1B1	65427
Volvox carteri	Vcar2B	56821
Toxoplasma gondii	Tgon1B1	TGME49_040870
Toxoplasma gondii	Tgon3B2	TGME49_089080
Toxoplasma gondii	Tgon4B1	TGME49_066280
Toxoplasma gondii	Tgon5B	EEE30072.1
Plasmodium falciparum	Pfal2B	PFE1400c
Plasmodium falciparum	Pfal3B2	PFF0655c
Plasmodium falciparum	Pfal4B1	MAL7P1.164
Tetrahymena thermophila	Tthe2B	3827.m00880
Tetrahymena thermophila	Tthe2B1	3829.m01154
Tetrahymena thermophila	Tthe2B2	3701.m00150
Tetrahymena thermophila	Tthe3B2	110.m00098
Tetrahymena thermophila	Tthe4B1	19.m00280
Phytophthora sojae	Psoj2B	109501
Phytophthora sojae	Psoj2B1	137959
Phytophthora sojae	Psoj3B2	130720
Thalassiosira pseudonana	Tpse2B	41687
Thalassiosira pseudonana	Tpse3B2	261056
Thalassiosira pseudonana	Tpse4B1	268650
Emiliania huxleyi	Ehux2B	448193
Emiliania huxleyi	Ehux2B1	253799
Ectocarpus siliculosus	Esil2B	Esi0126_0087
Ectocarpus siliculosus	Esil3B2	Esi0021_0107
Ectocarpus siliculosus	Esil4B1	Esi0512_0010
Bigelowiella natans	Bnat2B	56564
Bigelowiella natans	Bnat2B1	86539
Bigelowiella natans	Bnat3B2	90377
Bigelowiella natans	Bnat4B1	88218
Bigelowiella natans	Bnat5B	68635
AP Mu
Homo sapiens	Hsap3M1	NP_036227.1
Homo sapiens	Hsap3M2	NP_006794.1
Homo sapiens	Hsap1M1	NP_115882.1
Homo sapiens	Hsap1M2	NP_005489.2
Homo sapiens	Hsap2M	NP_004059.2
Homo sapiens	Hsap4M1	NP_004713.2
Homo sapiens	Hsap5M	NP_060699.3
Danio rerio	Drer1M2	NP_991277.1
Danio rerio	Drer2M1	NP_957320.1
Danio rerio	Drer3M1	NP_958449.1
Danio rerio	Drer4M1	NP_001002672.1
Danio rerio	Drer5M	NP_001018490.1
Nematostella vectensis	Nec1M1	estExt_gwp.C_320239
Nematostella vectensis	Nvec2M	e_gw.66.41.1
Nematostella vectensis	Nvec3M1	estExt_GenewiseH_1.C_1810106
Nematostella vectensis	Nvec4M1	e_gw.286.85.1
Nematostella vectensis	Nvec5M	e_gw.89.4.1
Batrachocytrium dendrobabtidis	Bden1M1	estExt_fgenesh1_kg.C_90023
Batrachocytrium dendrobabtidis	Bden2M	estExt_Genewise1Plus.C_160209
Batrachocytrium dendrobabtidis	Bden3M1	GP3.009690
Monosiga brevicollis	Mbre1M1	estExt_fgenesh1_pg.C_430037
Monosiga brevicollis	Mbre2M	estExt_fgenesh1_pg.C_300011
Monosiga brevicollis	Mbre3M1	estExt_fgenesh2_pg.C_40355
Monosiga brevicollis	Mbre4M1	estExt_fgenesh2_pg.C_90264
Monosiga brevicollis	Mbrev5M
Saccharomyces cerevisiae	Scer1M1	NP_015064.1
Saccharomyces cerevisiae	Scer2M	NP_014579.1
Saccharomyces cerevisiae	Scer3M2	NP_009847.1
Schizosaccharomyces pombe	Spom1M1	NP_595781.1
Schizosaccharomyces pombe	Spom2M	NP_592921.1
Schizosaccharomyces pombe	Spom3M1	NP_595509.1
Rhizopus oryzae	Rory1M1	RO3G_11835
Rhizopus oryzae	Rory2M	RO3G_14439
Rhizopus oryzae	Rory3M1	RO3G_11875
Cryptococcus neoformans	Cneo1M1	CNAG_03317
Cryptococcus neoformans	Cneo2M	CNAG_07474
Cryptococcus neoformans	Cneo3M1	CNAG_03877
Dictyostelium discoideum	Ddis1M1	DDB_G0289247
Dictyostelium discoideum	Ddis2M	DDB_G0277139
Dictyostelium discoideum	Ddis3M1	DDB_G0277901
Dictyostelium discoideum	Ddis4M1	DDB_G0276945
Dictyostelium discoideum	Ddis5M	DDB_G0285113
Entamoeba histolytica	Ehis1M2	EHI_124460
Entamoeba histolytica	Ehis1Mi1	EHI_089880
Entamoeba histolytica	Ehis2M	EHI_124560
Entamoeba histolytica	Ehis2Mi1	EHI_135430
Entamoeba histolytica	Ehis3M1	EHI_099240
Entamoeba histolytica	Ehis5M	EHI_189900
Trichomonas vaginalis	Tvag1M1	TVAG_421580
Trichomonas vaginalis	Tvag1M2	TVAG_333150
Trichomonas vaginalis	Tvag2M	TVAG_226350
Trichomonas vaginalis	Tvag2Mi1	TVAG_453580
Trichomonas vaginalis	Tvag3M1	TVAG_450230
Trichomonas vaginalis	Tvag3Mi1	TVAG_476310
Trichomonas vaginalis	Tvagunkn	TVAG_382010
Trichomonas vaginalis	Tvag3Mi2	TVAG_122070
Trichomonas vaginalis	Tvag3Mi3	TVAG_136750
Trichomonas vaginalis	Tvag3Mi4	TVAG_379480
Giardia intestinalis	Gint1M2	GL50803_89622
Giardia intestinalis	Gint2M	GL50803_8917
Trypanosoma brucei	Tbru1M1	Tb927.7.3180
Trypanosoma brucei	Tbru3M1	Tb927.4.2020
Trypanosoma brucei	Tbru4M1	Tb927.8.7050
Leishmania major	Lmaj1M1	LmjF22.1140
Leishmania major	Lmaj2M	LmjF36.3030
Leishmania major	Lmaj3M1	LmjF34.2590
Naegleria gruberi	Ngru1M1	estExt_gwp_gw1.C_110182
Naegleria gruberi	Ngru2M	fgeneshHS_pg.scaffold_57000009
Naegleria gruberi	Ngru3M1	e_gw1.7.61.1
Naegleria gruberi	Ngru4M1	fgeneshNG_pm.scaffold_34000001
Naegleria gruberi	Ngru4Mi1	estExt_Genewise1.C_50129
Naegleria gruberi	Ngru5M	estExt_fgeneshHS_pg.C_220021
Arabidopsis thaliana	Atha1M1	AT1G60780.1
Arabidopsis thaliana	Atha1Mi1	AT1G10730.1
Arabidopsis thaliana	Atha2M	AT5G46630.2
Arabidopsis thaliana	Atha3M1	AT1G56590.1
Arabidopsis thaliana	Atha4M1	AT4G24550.2
Arabidopsis thaliana	Atha5M	AT2G20790.1
Physcomitrella patens	Ppat1M1	172080
Physcomitrella patens	Ppat1Mi1	108647
Physcomitrella patens	Ppat2M	209451
Physcomitrella patens	Ppat2Mi1	220538
Physcomitrella patens	Ppat3M1	234299
Physcomitrella patens	Ppat4M1	131651
Physcomitrella patens	Ppat5M	192614
Chlamydomonas reinhardtii	Crei1M1	182329
Chlamydomonas reinhardtii	Crei2M	24387
Chlamydomonas reinhardtii	Crei4M1	195455
Ostreococcus tauri	Otau1M1	18341
Ostreococcus tauri	Otau2M	21722
Ostreococcus tauri	Otau3M1	18737
Ostreococcus tauri	Otau4M1	29698
Volvox carteri	Vcar1M1	108841
Volvox carteri	Vcar2M	93610
Volvox carteri	Vcar4M1	61858
Toxoplasma gondii	Tgon1M1	TGME49_089770
Toxoplasma gondii	Tgon2M	TGME49_030920
Toxoplasma gondii	Tgon4M1	TGME49_007390
Toxoplasma gondii	Tgon3M1	TGME49_069480
Toxoplasma gondii	Tgon5M	TGME49_024160
Plasmodium falciparum	Pfal1M1	PF13_0062
Plasmodium falciparum	Pfal2M	PFL0885w
Plasmodium falciparum	Pfal4M1	PF11_0202
Tetrahymena thermophila	Tthe1M1	3797.m00202
Tetrahymena thermophila	Tthe1Mi1	3712.m00022
Tetrahymena thermophila	Tthe2M	3812.m02678
Tetrahymena thermophila	Tthe3M1	3810.m02099
Tetrahymena thermophila	Tthe4M1	3729.m00041
Phythophthora sojae	Psoj1M1	108738
Phythophthora sojae	Psoj2M	108629
Phythophthora sojae	Psoj3M1	109265
Phythophthora sojae	Psoj4M1	108602
Thalassiosira pseudonana	Tpse1M1	37264
Thalassiosira pseudonana	Tpse2M	39847
Thalassiosira pseudonana	Tpse3M1	39741
Thalassiosira pseudonana	Tpse4M1	31014
Emiliania huxleyi	Ehux1M1	434096
Emiliania huxleyi	Ehux2M	435461
Emiliania huxleyi	Ehux2Mi1	459870
Emiliania huxleyi	Ehux2Mi2	467213
Emiliania huxleyi	Ehux4M1	432880
Ectocarpus siliculosus	Esil1M1	Esi0156_0050
Ectocarpus siliculosus	Esil2M	Esi0069_0041
Ectocarpus siliculosus	Esil3M1	Esi0018_0062
Ectocarpus siliculosus	Esil4M1	Esi0264_0009
Bigelowiella natans	Bnat1M1	47664
Bigelowiella natans	Bnat1Mi1	92139
Bigelowiella natans	Bnat2M	80113
Bigelowiella natans	Bnat2Mi1	37044
Bigelowiella natans	Bnat3M1	55551
Bigelowiella natans	Bnat4M1	37976
Bigelowiella natans	Bnat5M	78471
AP GADEZ
Homo sapiens	Hsap1G1	NP_001025178.1
Homo sapiens	Hsap1G2	NP_003908.1
Homo sapiens	Hsap2A1	NP_036437.1
Homo sapiens	Hsap2A2	NP_0055018.2
Homo sapiens	Hsap3D1	NP_003929.4
Homo sapiens	Hsap4E1	NP_031171.2
Homo sapiens	Hsapi5Z1	NP_055670.1
Danio rerio	Drer1G1	NP_955976.1
Danio rerio	Drer1G2	XP_005171401.1
Danio rerio	Drer2A1	XP_001922436.1
Danio rerio	Drer3D1	NP_001038480.1
Danio rerio	Drer3D2	XP_005170529.1
Danio rerio	Drer4E1	XP_699042.2
Danio rerio	Dreri5Z1	XP_003198198.1
Nematostella vectensis	Nvec1G1	e_gw.64.20.1
Nematostella vectensis	Nvec2A2	estEXT_fgenesh1_kg.C_40012
Nematostella vectensis	Nvec3D2	e_gw.124.5.1
Nematostella vectensis	Nvec4E1	estExt_gwp.C_10199
Nematostella vectensis	Nvect5Z1	XP_001639990.1
Batrachochytrium dendrobatidis	Bden1G1	BDEG_04280.1
Batrachochytrium dendrobatidis	Bden2A2	BDEG_06612.1
Batrachochytrium dendrobatidis	Bden3D2	BDEG_04206.1
Monosiga brevicollis	Mbre1G1	XP_001749664.1
Monosiga brevicollis	Mbre2A2	XP_001742710.1
Monosiga brevicollis	Mbre3D1	XP_001750781.1
Monosiga brevicollis	Mbre4E1	XP_001747321.1
Monosiga brevicollis	Mbrev5Z1	XP_001742355.1
Saccharomyces cerevisiae	Scer1G1	NP_015354.1
Saccharomyces cerevisiae	Scer2A2	NP_009516.1
Saccharomyces cerevisiae	Scer3D1	NP_015129.1
Schizosaccharomyces pombe	Spom1G1	NP_588559.1
Schizosaccharomyces pombe	Spom2A2	NP_595595.1
Schizosaccharomyces pombe	Spom3D1	NP_594667.2
Rhizopus oryzae	Rory1G1	EIE83368.1
Rhizopus oryzae	Rory2A1	EIE78337.1
Rhizopus oryzae	Rory3D1	EIE83063.1
Dictyostelium discoideum	Ddis1G1	XP_640382.1
Dictyostelium discoideum	Ddis2A2	XP_644619.1|
Dictyostelium discoideum	Ddis3D1	XP_641687.1
Dictyostelium discoideum	Ddis4E1	XP_641169.1
Dictyostelium discoideum	Ddict5Z1	XP_628907.1
Enthamoeba histolytica	Ehis1G1	BAE94785.1
Enthamoeba histolytica	Ehis2A1	XP_649590.1
Enthamoeba histolytica	Ehis3D1	BAE94790.1
Enthamoeba histolytica	Ehis4E1	BAE94791.1
Enthamoeba histolytica	Ehist5Z1	XP_656237.1
Trichomonas vaginalis	Tvag1G1	TVAG_387740
Trichomonas vaginalis	Tvag2A1	TVAG_547230
Trichomonas vaginalis	Tvag3D1	TVAG_415510
Trichomonas vaginalis	Tvag4E1	TVAG_020230
Trypanosoma brucei	Tbru1G1	XP_844226.1
Trypanosoma brucei	Tbru3D1	XP_845031.1
Trypanosoma brucei	Tbru4E1	XP_845417.1
Leishmania major	Lmaj1G1	XP_001686504.1
Leishmania major	Lmaj2A1	XP_001680909.1
Leishmania major	Lmaj3D1	XP_001681038.1
Naegleria gruberi	Ngru1G1	estExt_gwp_gw1.C_90126
Naegleria gruberi	Ngru2A1	estExt_fgeneshHS_pm.C_650002
Naegleria gruberi	Ngru3D1	estExt_gwp_gw1.C_280122
Naegleria gruberi	Ngru4E1	gw1.27.7.1
Arabidopsis thaliana	Atha1G1	NP_173802.1
Arabidopsis thaliana	Atha2A1	NP_197669.1
Arabidopsis thaliana	Atha3D1	NP_175308.1
Arabidopsis thaliana	Atha4E1	NP_174454.1
Arabidopsis thaliana	Athal5Z1	NP_188134.2
Physcomitrella patens	Ppat1G1	estExt_fgenesh1_pm.C_2110007
Physcomitrella patens	Ppat2A1	estExt_Genewise1.C_260027
Physcomitrella patens	Ppat3D1	e_gw1.229.47.1
Physcomitrella patens	Ppat4E1	estExt_Genewise1.C_460079
Physcomitrella patens	Ppat5Z1	XP_001755114.1
Chlamydomonas reinhardtii	Crei1G1	estExt_GenewiseH_1.C_280015
Chlamydomonas reinhardtii	Crei2A1	SAN_fgenesh2_pg.C_scaffold_11000320
Chlamydomonas reinhardtii	Crei4E1	SAN_e_gwH.12.195.1
Ostreococcus tauri	Otau1G1	XP_003078947.1
Ostreococcus tauri	Otau2A1	XP_003082740.1
Ostreococcus tauri	Otau3D1	XP_003084451.1
Ostreococcus tauri	Otau4E1	XP_003082207.1
Volvox carteri	Vcar1G1	fgenesh4_pm.C_scaffold_14000007
Volvox carteri	Vcar2A1	estExt_fgenesh5_synt.C_90098
Volvox carteri	Vcar4E1	fgenesh4_pg.C_scaffold_4000293
Toxoplasma gondii	Tgon1G1	XP_002364578.1
Toxoplasma gondii	Tgon2A2	TGGT1_065750
Toxoplasma gondii	Tgon3D1	XP_002364204.1
Toxoplasma gondii	Tgon4E1	EPT30551.1
Toxoplasma gondii	Tgond5Z1	EEE23587.1
Tetrahymena thermophila	Tthe1G1	EAR84271.1
Tetrahymena thermophila	Tthe2A2	EAR83583.1
Tetrahymena thermophila	Tthe3D1	XP_001014633.2
Tetrahymena thermophila	Tthe4E1	XP_001021293.1
Phytophthora sojae	Psoj1G1	estExt_fgenesh1_pg.C_260055
Phytophthora sojae	Psoj2A1	estExt_fgenesh1_pg.C_520075
Phytophthora sojae	Psoj3D1	estExt_fgenesh1_pg.C_240140
Phytophthora sojae	Psoj4E1	estExt_fgenesh1_pg.C_300122
Thalassiosira pseudonana	Tpse1G1	estExt_thaps1_ua_kg.C_chr_140045
Thalassiosira pseudonana	Tpse2A1	thaps1_ua_kg.chr_13000042
Thalassiosira pseudonana	Tpse3D1	thaps1_ua_kg.chr_13000011
Thalassiosira pseudonana	Tpse4E1	fgenesh1_pm.C_chr_7000034
Emiliania huxleyi	Ehux1G1	estExtDG_Genewise1.C_590065
Emiliania huxleyi	Ehux2A1	estExtDG_Genewise1.C_2450022
Emiliania huxleyi	Ehux4E1	estExtDG_Genewise1.C_8550002
Ectocarpus siliculosus	Esil1G1	Esi0110_0005
Ectocarpus siliculosus	Esil2A1	Esi0143_0066
Ectocarpus siliculosus	Esil3D1	Esi0376_0020
Ectocarpus siliculosus	Esil4E1	Esi0032_0094
Bigelowiella natans	Bnat1G1	18859
Bigelowiella natans	Bnat2A2	85983
Bigelowiella natans	Bnat2A21	85984
Bigelowiella natans	Bnat3D1	19572
Bigelowiella natans	Bnat4E1	87943
Bigelowiella natans	Bnat5Z1	80322
AP Sigma
Homo sapiens	Hsap1S1	P61966
Homo sapiens	Hsap1S2	P56377
Homo sapiens	Hsap1S3	Q96PC3
Homo sapiens	Hsap2S	P53680
Homo sapiens	Hsap3S1	Q92572
Homo sapiens	Hsap3S2	P59780
Homo sapiens	Hsap4S1	Q9Y587
Homo sapiens	Hsapi5S1	NP_060817.1
Danio rerio	Drer1S1	OTTDARP00000020625
Danio rerio	Drer1S11	OTTDARP00000020626
Danio rerio	Drer1S2	OTTDARP00000023657
Danio rerio	Drer1S21	OTTDARP00000023654
Danio rerio	Drer1S22	OTTDARP00000023656
Danio rerio	Drer1S23	OTTDARP00000023655
Danio rerio	Drer2S	OTTDARP00000024305
Danio rerio	Drer3S1	OTTDARP00000031085
Danio rerio	Drer3S2	OTTDARP00000031083
Danio rerio	Drer3S21	OTTDARP00000031084
Danio rerio	Drer4S1	OTTDARP00000021080
Danio rerio	Drer4S11	OTTDARP00000021081
Danio rerio	Dreri5S1	XP_005156643.1
Nematostella vectensis	Nvec1S2	92832
Nematostella vectensis	Nvec2S	101531
Nematostella vectensis	Nvec3S1	101020
Nematostella vectensis	Nvec4S1	114561
Strongylocentrotus purpuratus	Spurp5S1	XP_001177708.1
Batrachochytrium dendrobatidis	Bden1S1	BDEG_03085
Batrachochytrium dendrobatidis	Bden1S2	BDEG_05743
Batrachochytrium dendrobatidis	Bden2S	8507
Batrachochytrium dendrobatidis	Bden3S1	BDEG_06927
Batrachochytrium dendrobatidis	Bden3S11	BDEG_03954
Batrachochytrium dendrobatidis	Bden3S12	BDEG_03808
Batrachochytrium dendrobatidis	Bden4S1	BDEG_02408
Monosiga brevicollis	Mbre1S2	18290
Monosiga brevicollis	Mbre2S	19605
Monosiga brevicollis	Mbre3S2	34516
Monosiga brevicollis	Mbre4S1	10687
Salpingoeca sp. ATCC 50818	Salpi5S1	EGD75751.1
Saccharomyces cerevisiae	Scer1S2	SGDID:S000004160
Saccharomyces cerevisiae	Scer2S	SGDID:S000003819
Saccharomyces cerevisiae	Scer3S1	SGDID:S000003561
Schizosaccharomyces pombe	Spom1S2	SPAP27G11_06c
Schizosaccharomyces pombe	Spom2S	SPBC685_04c
Schizosaccharomyces pombe	Spom3S1	SPAC30D11_05
Rhizopus oryzae	Rory1S3	RO3G_10609
Rhizopus oryzae	Rory3S2	RO3G_16250
Cryptococcus neoformans	Cneo1S1	CNAG_02113
Cryptococcus neoformans	Cneo2S	CNAG_06417
Cryptococcus neoformans	Cneo3S1	CNAG_05902
Dictyostelium discoideum	Ddis1S2	DDB_G0295711
Dictyostelium discoideum	Ddis1S21	DDB_G0279359
Dictyostelium discoideum	Ddis2S	DDB_G0289721
Dictyostelium discoideum	Ddis3S1	DDB_G0275405
Dictyostelium discoideum	Ddis4S1	DDB_G0284905
Dictyostelium discoideum	Ddis5S1	XP_646796.1
Enthamoeba histolytica	Ehis1S1	EHI_178740
Enthamoeba histolytica	Ehis2S	EHI_009940
Enthamoeba histolytica	Ehis3S2	EHI_103550
Enthamoeba histolytica	Ehis4S1	EHI_045190
Enthamoeba histolytica	Ehis5S1	XP_001914013.1
Trichomonas vaginalis	Tvag1S2	TVAG_442910
Trichomonas vaginalis	Tvag1S21	TVAG_379690
Trichomonas vaginalis	Tvag1S22	TVAG_101310
Trichomonas vaginalis	Tvag1S23	TVAG_056870
Trichomonas vaginalis	Tvag2S	TVAG_214290
Trichomonas vaginalis	Tvag2S1	TVAG_134680
Trichomonas vaginalis	Tvag2S2	TVAG_262470
Trichomonas vaginalis	Tvag3S1	TVAG_199010
Trichomonas vaginalis	Tvag3S11	TVAG_288480
Trichomonas vaginalis	Tvag3S12	TVAG_166420
Trichomonas vaginalis	Tvag4S1	TVAG_071140
Trichomonas vaginalis	Tvag4S11	TVAG_283330
Giardia intestinalis	Gint1S3	GL50803_91198
Giardia intestinalis	Gint2S	GL50803_5328
Trypanosoma brucei	Tbru1S2	Tb927.3.4000
Trypanosoma brucei	Tbru3S2	Tb927.8.6680
Trypanosoma brucei	Tbru4S1	Tb927.10.14260
Leishmania major	Lmaj1S2	LmjF29.1440
Leishmania major	Lmaj2S	LmjF34.2330
Leishmania major	Lmaj3S2	LmjF24.1540
Naegleria gruberi	Ngru1S3	29136
Naegleria gruberi	Ngru2S	60123
Naegleria gruberi	Ngru3S2	60520
Naegleria gruberi	Ngru4S1	60160
Arabidopsis thaliana	Atha1S2	AT4G35410.2
Arabidopsis thaliana	Atha1S21	AT2G17380.1
Arabidopsis thaliana	Atha2S	AT1G47830.1
Arabidopsis thaliana	Atha3S2	AT3G50860.1
Arabidopsis thaliana	Atha4S1	AT2G19790.1
Physcomitrella patens	Ppat1S2	222350
Physcomitrella patens	Ppat1S21	134897
Physcomitrella patens	Ppat2S	221849
Physcomitrella patens	Ppat2S1	195937
Physcomitrella patens	Ppat3S1	136360
Physcomitrella patens	Ppat4S1	200793
Chlamydomonas reinhardtii	Crei1S3	184165
Chlamydomonas reinhardtii	Crei2S	195448
Chlamydomonas reinhardtii	Crei4S1	195457
Ostreococcus tauri	Otau1S2	19517
Ostreococcus tauri	Otau2S	21832
Ostreococcus tauri	Otau3S1	22091
Ostreococcus tauri	Otau4S1	24204
Volvox carteri	Vcar1S3	106707
Volvox carteri	Vcar2S	76532
Volvox carteri	Vcar4S1	109095
Toxoplasma gondii	Tgon1S2	TGME49_070370
Toxoplasma gondii	Tgon2S	TGME49_113450
Toxoplasma gondii	Tgon3S2	TGME49_015130
Toxoplasma gondii	Tgon4S1	TGME49_114420
Toxoplasma gondii	Tgond5S1	EPR57031.1
Plasmodium falciparum	Pfal1S2	PF11_0187
Plasmodium falciparum	Pfal2S	PFB0805c
Plasmodium falciparum	Pfal3S2	PFL2425w
Plasmodium falciparum	Pfal4S1	PFD1090c
Tetrahymena thermophila	Tthe1S1	3832.m00150
Tetrahymena thermophila	Tthe2S	3705.m00070
Tetrahymena thermophila	Tthe3S2	3752.m00331
Tetrahymena thermophila	Tthe4S1	282.m00041
Phytophthora sojae	Psoj1S1	142816
Phytophthora sojae	Psoj1S11	142143
Phytophthora sojae	Psoj2S	145584
Phytophthora sojae	Psoj2S1	130041
Phytophthora sojae	Psoj3S2	108187
Phytophthora sojae	Psoj4S1	109595
Thalassiosira pseudonana	Tpse1S2	33667
Thalassiosira pseudonana	Tpse2S	36490
Thalassiosira pseudonana	Tpse3S2	28984
Thalassiosira pseudonana	Tpse4S1	5631
Emiliania huxleyi	Ehux1S1	438661
Emiliania huxleyi	Ehux1S11	78860
Emiliania huxleyi	Ehux2S	429503
Emiliania huxleyi	Ehux2S1	415746
Ectocarpus siliculosus	Esil1S2	Esi0000_0535
Ectocarpus siliculosus	Esil2S	Esi0061_0029
Ectocarpus siliculosus	Esil3S2	Esi0002_0312
Ectocarpus siliculosus	Esil4S1	Esi0053_0030
Bigelowiella natans	Bnat1S2	49528
Bigelowiella natans	Bnat2S	91595
Bigelowiella natans	Bnat2S1	36698
Bigelowiella natans	Bnat3S2	89989
Bigelowiella natans	Bnat4S1	52783
Bigelowiella natans	Bnata5S1	69803
