# Supplementary material for: Characterization of TSET, an ancient and widespread membrane trafficking complex
Source: eLife journal article supplement (doi:10.7554/elife.02866), 2014-05-27
Supplement: figures [file elife-02866-figures-v1.pdf]

---

## Figures and figure supplements

Characterization of TSET, an ancient and widespread membrane trafficking complex

**Jennifer Hirst, et al.**

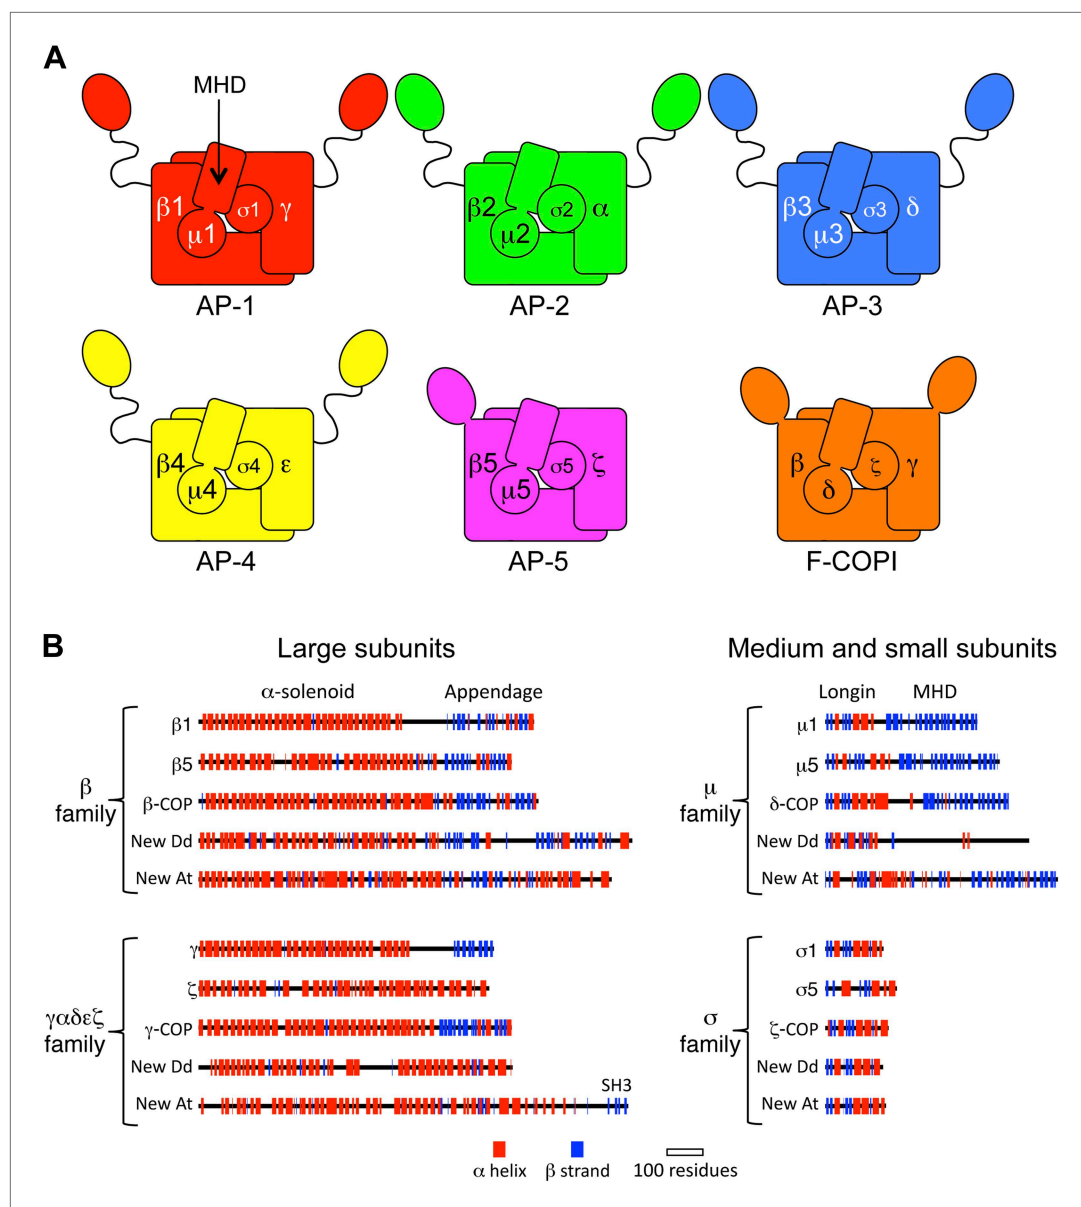

**Figure 1.** Diagrams of APs and F-COPI. **(A)** Structures of the assembled complexes. All six complexes are heterotetramers; the individual subunits are called adaptins in the APs (e.g.,  $\gamma$ -adaptin) and COPs in COPI (e.g.,  $\gamma$ -COP). The two large subunits in each complex are structurally similar to each other. They are arranged with their N-terminal domains in the core of the complex, and these domains are usually (but not always) followed by a flexible linker and an appendage domain. The medium subunits consist of an N-terminal longin-related domain followed by a C-terminal  $\mu$  homology domain (MHD). The small subunits consist of a longin-related domain only. **(B)** Jpred secondary structure predictions of some of the known subunits (all from *Homo sapiens*), together with new family members from *Dictyostelium discoideum* (Dd) and *Arabidopsis thaliana* (At). See also **Figure 1—figure supplements 1–4, Figure 1—source data 1, 2**.

DOI: [10.7554/eLife.02866.003](https://doi.org/10.7554/eLife.02866.003)

| PDB ID(large)           | Details                                                                                                                                                   | Amino acids |
|-------------------------|-----------------------------------------------------------------------------------------------------------------------------------------------------------|-------------|
| 2g30_A                  | Chain A, Beta Appendage Of Ap2 Complexed With Arh Peptide                                                                                                 | 258         |
| 2vgl_A                  | Chain A, Ap2 Clathrin Adaptor Core                                                                                                                        | 621         |
| 2vgl_B                  | Chain B, Ap2 Clathrin Adaptor Core                                                                                                                        | 591         |
| 3hs8_A                  | Chain A, Intersectin 1-Peptide-Ap2 Alpha Ear Complex                                                                                                      | 273         |
| 2e9g_A                  | Chain A, Solution Structure Of The Alpha Adaptinc2 Domain From Human Adapter-Related Protein Complex 1 Gamma 2 Subunit.                                   | 131         |
| 3zy7_A                  | Chain A, Crystal Structure Of Computationally Redesigned Gamma-Adaptin Appendage Domain Forming A Symmetric Homodimer.                                    | 122         |
| 1iu1_A                  | Chain A, Crystal Structure Of Human Gamma1-Adaptin Ear Domain.                                                                                            | 146         |
| 1kyf_A                  | Chain A, Ap-2 Clathrin Adaptor Alpha-Appendage In Complex With Eps15 Dpf Peptide.                                                                         | 247         |
| 1w63_A                  | Chain A, Ap1 Clathrin Adaptor Core.                                                                                                                       | 618         |
| 1gyu_A                  | Chain A, Gamma-Adaptin Appendage Domain From Clathrin Adaptor Ap1.                                                                                        | 140         |
| 1w63_B                  | Chain B, Ap1 Clathrin Adaptor Core                                                                                                                        | 584         |
| PDB ID (medium & small) | Details                                                                                                                                                   | Amino acids |
| 3l81_A                  | Chain A, Crystal Structure Of Adaptor Protein Complex 4 (Ap-4) Mu Su Terminal Domain, In Complex With A Sorting Peptide From The Precursor Protein (App). | 301         |
| 2vgl_M                  | Chain M, Ap2 Clathrin Adaptor Core                                                                                                                        | 435         |
| 2vgl_S                  | Chain S, Ap2 Clathrin Adaptor Core                                                                                                                        | 142         |
| 1w63_M                  | Chain M, Ap1 Clathrin Adaptor Core                                                                                                                        | 423         |
| 1w63_Q                  | Chain Q, Ap1 Clathrin Adaptor Core                                                                                                                        | 158         |
| 1i31_A                  | Chain A, Mu2 Adaptin Subunit (Ap50) Of Ap2 Clathrin Adaptor, Complexed With Egfr Internalization Peptide Fyralm                                           | 314         |

**Figure 1—figure supplement 1.** PDB entries used to search for adaptor-related proteins.

DOI: [10.7554/eLife.02866.006](https://doi.org/10.7554/eLife.02866.006)

**Figure 1—figure supplement 2.** Summary table of all subunits identified using reverse HHpred.  
DOI: 10.7554/eLife.02866.007



|                                   | Accession      | Amino acids | ID              |
|-----------------------------------|----------------|-------------|-----------------|
| <i>Arabidopsis thaliana</i>       | NP_001189515.1 | 1198        | TSAUCER         |
| <i>Selaginella moellendorffii</i> | XP_002983953.1 | 1058        | TSAUCER         |
| <i>Selaginella moellendorffii</i> | XP_002960718.1 | 1058        | TSAUCER         |
| <i>Vitis vinifera</i>             | XP_002275101.1 | 1202        | TSAUCER         |
| <i>Volvox carteri</i>             | XP_002954451.1 | 1376        | TSAUCER         |
| <i>Micromonas pusilla</i>         | XP_003058310.1 | 848         | TSAUCER         |
|                                   |                |             |                 |
| <i>Micromonas pusilla</i>         | XP_003055695.1 | 1529        | TPLATE          |
|                                   |                |             |                 |
| <i>Physcomitrella patens</i>      | XP_001755114.1 | 579         | AP-5 $\zeta$    |
| <i>Physcomitrella patens</i>      | XP_001753717.1 | 574         | AP-5 $\zeta$    |
|                                   |                |             |                 |
| <i>Arabidopsis thaliana</i>       | NP_188621.2    | 1090        | AP-5 $\beta 5$  |
| <i>Selaginella moellendorffii</i> | XP_002960166.1 | 1121        | AP-5 $\beta 5$  |
| <i>Selaginella moellendorffii</i> | XP_002983970.1 | 1120        | AP-5 $\beta 5$  |
| <i>Physcomitrella patens</i>      | XP_001753719.1 | 1138        | AP-5 $\beta 5$  |
| <i>Vitis vinifera</i>             | XP_002272061.2 | 1099        | AP-5 $\beta 5$  |
| <i>Dictyostelium discoideum</i>   | XP_640040.1    | 1398        | AP-5 $\beta 5$  |
|                                   |                |             |                 |
| <i>Homo sapiens</i>               | NP_612377.4    | 878         | AP-5 $\beta 5$  |
| <i>Naegleria gruberi</i>          | XP_002677583.1 | 1758        | AP-5 $\beta 5$  |
|                                   |                |             |                 |
| <i>Homo sapiens</i>               | NP_060817      | 200         | AP-5 $\sigma 5$ |
|                                   |                |             |                 |
| <i>Giardia lamblia</i>            | XP_001704530.1 | 960         | $\gamma$ -COP   |
| <i>Naegleria gruberi</i>          | XP_002683551.1 | 143         | $\zeta$ -COP    |
|                                   |                |             |                 |

**Figure 1—figure supplement 3.** Subunits that failed to be identified using reverse HHpred, but were identified by homology searching using NCBI BLAST.

DOI: [10.7554/eLife.02866.008](https://doi.org/10.7554/eLife.02866.008)

|                                   | $\beta$ -like<br>(TPLATE)                          | $\alpha\gamma\delta\epsilon\zeta$ - like<br>(TSAUCER) | $\mu$ -like<br>(TCUP) | $\sigma$ -like<br>(TSPOON)       | $\beta'$ -COP like<br>(TTRAY1)   | $\beta'$ -COP like<br>(TTRAY2)   |
|-----------------------------------|----------------------------------------------------|-------------------------------------------------------|-----------------------|----------------------------------|----------------------------------|----------------------------------|
| <i>Arabidopsis thaliana</i>       | NP_186827.2<br>(TPLATE)                            | NP_001189515.1<br>(TASH3)                             | NP_200555.1<br>(TML)  | NP_172989.1<br>(LOLITA)          | NP_190628.6<br>(TWD40-1)         | NP_197859.4<br>(TWD40-2)         |
| <i>Selaginella moellendorffii</i> | XP_002985757.1<br>XP_002974452.1                   | XP_002983953.1<br>XP_002960718.1                      | XP_002983631.1        | XP_002974400.1<br>XP_002985698.1 | XP_002988683.1<br>XP_002986386.1 | XP_002969859.1<br>XP_002985192.1 |
| <i>Physcomitrella patens</i>      | XP_001753083.1<br>XP_001764266.1<br>XP_001761456.1 | Pp1s206_101V6.1                                       | XP_001784609.1        | XP_001752367.1                   | XP_001761291.1                   | XP_001757483.1                   |
| <i>Vitis vinifera</i>             | XP_002263932.1                                     | XP_002275101.1                                        | XP_002271128.1        | XP_002268544.1                   | XP_003635289.1                   | XP_002263744.1                   |
| <i>Volvox carteri</i>             | XP_002948025.1                                     | XP_002954451.1                                        | XP_002958785.1        | XP_002949494.1                   | XP_002948805.1                   | XP_002950796.1                   |
| <i>Naegleria gruberi</i>          | XP_002675144.1                                     | XP_002677398.1                                        | XP_002671328.1        | XP_002673133.1                   | none identified                  | XP_002676398.1                   |
| <i>Micromonas pusilla</i>         | XP_003055695.1                                     | XP_003058310.1                                        | none identified       | XP_003057871.1                   | XP_003064579.1                   | 191839 PACid:273<br>44862        |
| <i>Dictyostelium purpureum</i>    | XP_003286721.1                                     | XP_003291898.1                                        | DPU0040472            | XP_003287313.1                   | XP_003287680.1                   | XP_003287023.1                   |
| <i>Dictyostelium discoideum</i>   | XP_639969.1                                        | XP_640471.1                                           | XP_629998.1           | DDB_G0350235                     | XP_642289.1                      | XP_637150.1                      |

**Figure 1—figure supplement 4.** TSET orthologues in different species.

DOI: [10.7554/eLife.02866.009](https://doi.org/10.7554/eLife.02866.009)

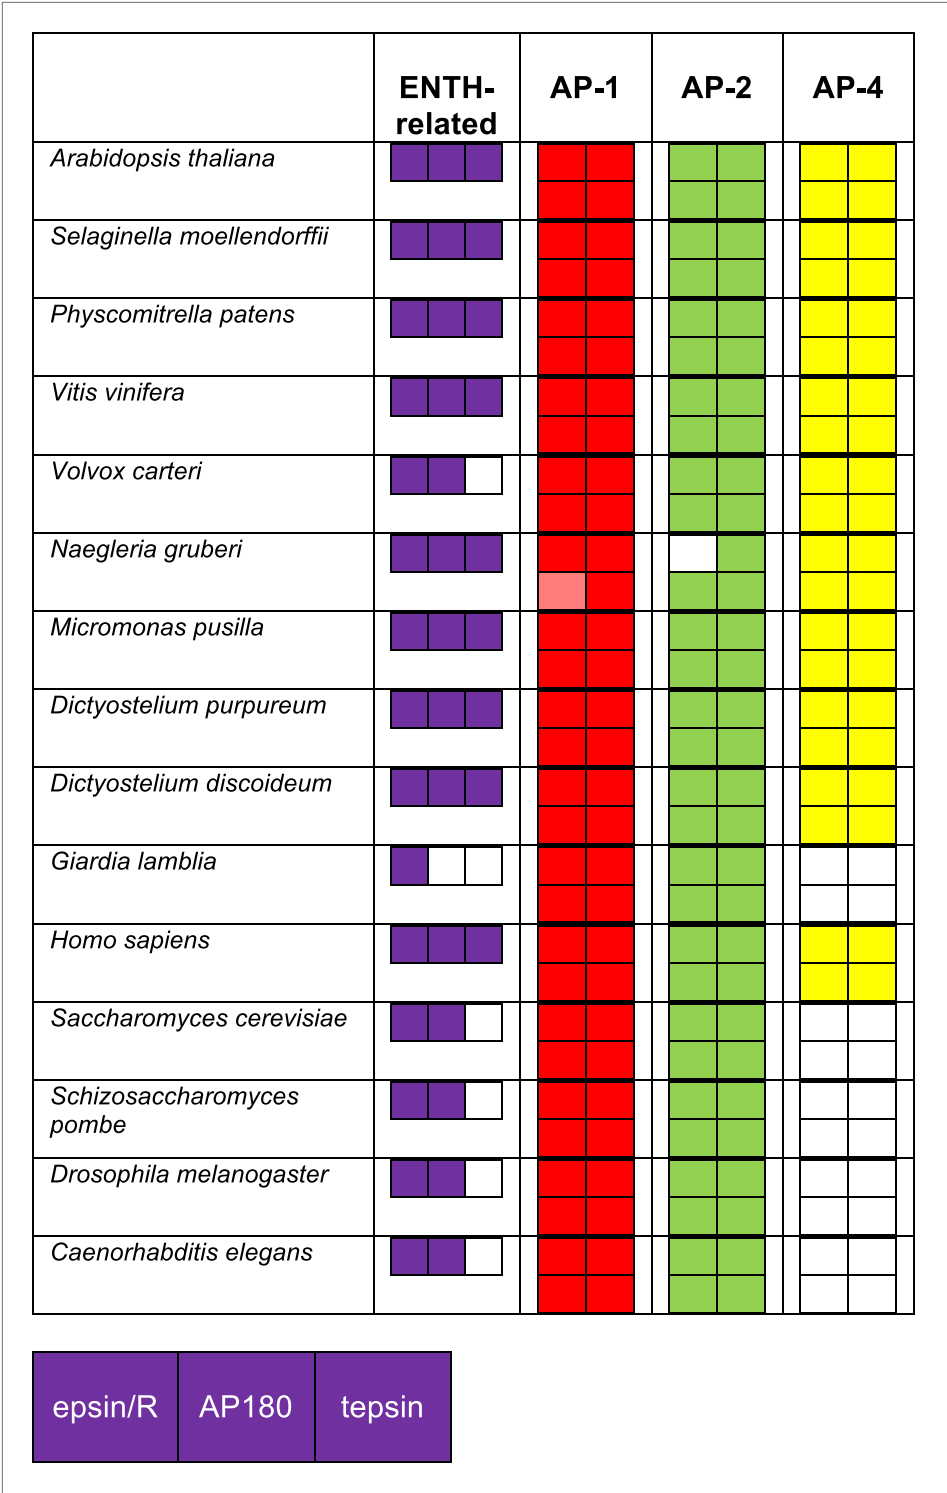

**Figure 1—figure supplement 5.** Identification of ENTH/ANTH domain proteins and the AP complexes with which they associate, using reverse HHpred.  
DOI: 10.7554/eLife.02866.010

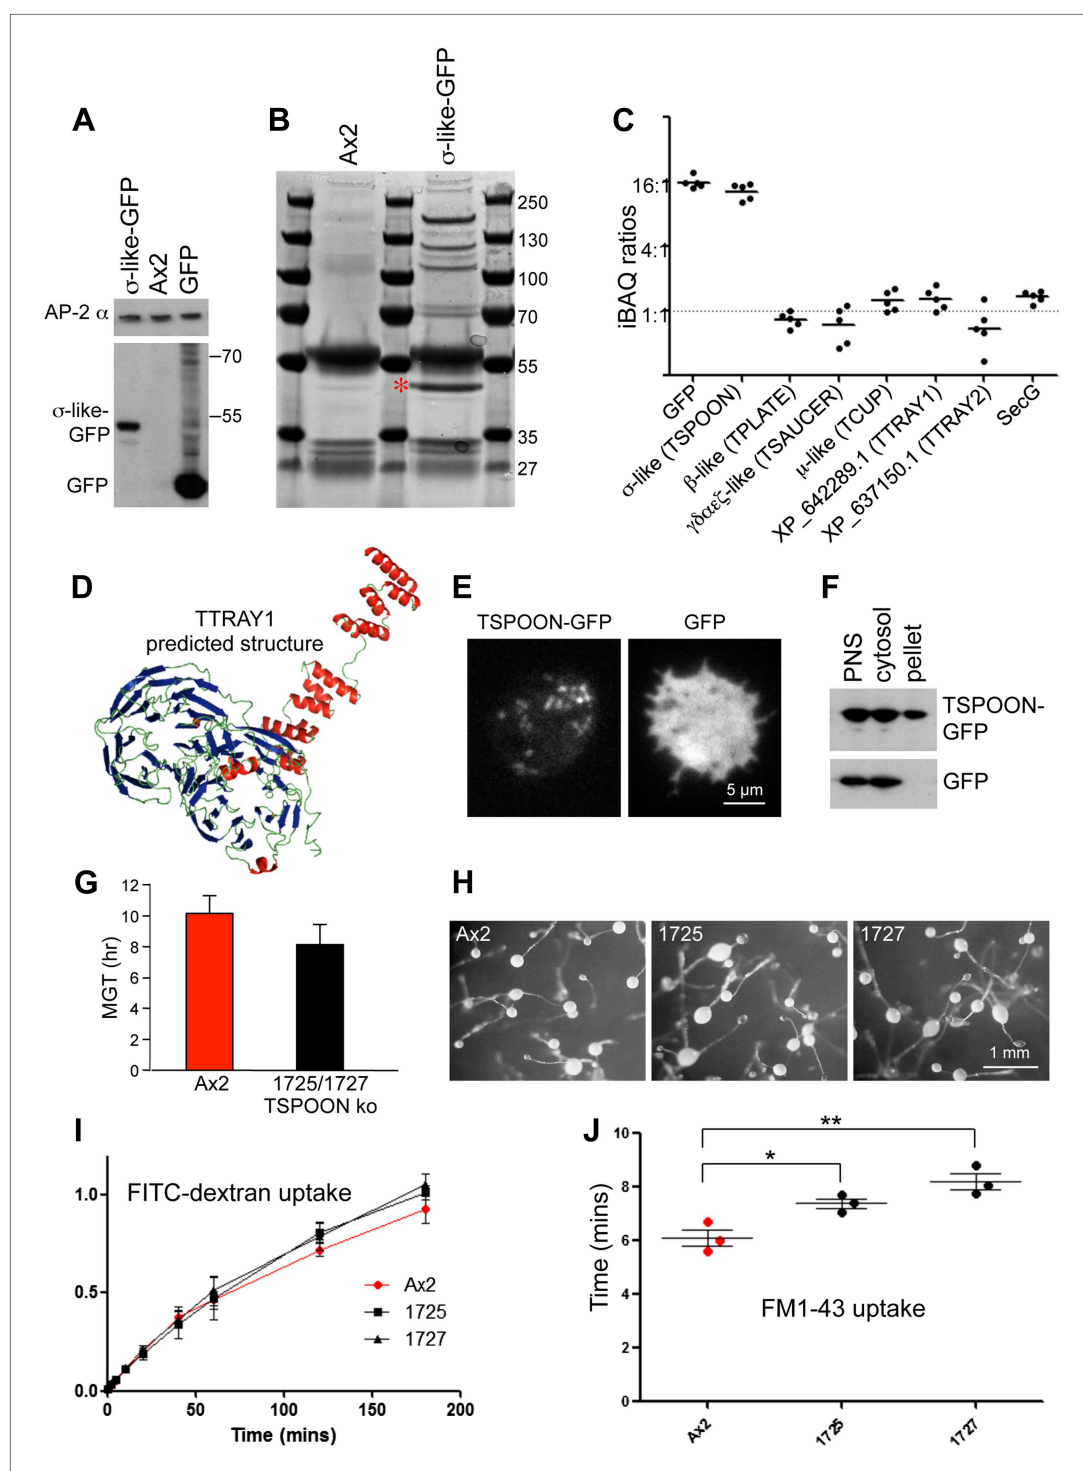

**Figure 2.** Characterisation of the TSET complex in *Dictyostelium*. **(A)** Western blots of axenic *D. discoideum* expressing either GFP-tagged small subunit ( $\sigma$ -like) or free GFP, under the control of the Actin15 promoter, labelled with anti-GFP. The Ax2 parental cell strain was included as a control, and an antibody against the AP-2 $\alpha$  subunit was used to demonstrate that equivalent amounts of protein were loaded. **(B)** Coomassie blue-stained gel of GFP-tagged small subunit and associated proteins immunoprecipitated with anti-GFP. The GFP-tagged protein is indicated with a red asterisk. **(C)** iBAQ ratios (an estimate of molar ratios) for the proteins that consistently coprecipitated with the GFP-tagged small subunit. All appear to be equimolar with each other, and the higher ratios for the small ( $\sigma$ -like/TSPOON) subunit and GFP are likely to be a consequence of their overexpression, which we also saw in a repeat. *Figure 2. Continued on next page*

## Figure 2. Continued

experiment in which we used the small subunit's own promoter (**Figure 2—figure supplement 1**). **(D)** Predicted structure of the N-terminal portion of *D. discoideum* TTRAY1, shown as a ribbon diagram. **(E)** Stills from live cell imaging of cells expressing either TSPOON-GFP or free GFP, using TIRF microscopy. The punctate labelling in the TSPOON-GFP-expressing cells indicates that some of the construct is associated with the plasma membrane. See **Videos 1 and 2**. **(F)** Western blots of extracts from cells expressing either TSPOON-GFP or free GFP. The post-nuclear supernatants (PNS) were centrifuged at high speed to generate supernatant (cytosol) and pellet fractions. Equal protein loadings were probed with anti-GFP. Whereas the GFP was exclusively cytosolic, a substantial proportion of TSPOON-GFP fractionated into the membrane-containing pellet. **(G)** Mean generation time (MGT) for control (Ax2) and TSPOON knockout cells. The knockout cells grew slightly faster than the control. **(H)** Differentiation of the Ax2 control strain and two TSPOON knockout strains (1725 and 1727). All three strains produced fruiting bodies upon starvation. **(I)** Assay for fluid phase endocytosis. The control and knockout strains took up FITC-dextran at similar rates. **(J)** Assay for endocytosis of membrane, labelled with FM1-43, showing the time taken to internalise the entire surface area. The knockout strains took significantly longer than the control (\* $p < 0.05$ ; \*\* $p < 0.01$ ). See also **Figure 2—figure supplements 1 and 2**, **Figure 2**, **Videos 1 and 2**.

DOI: [10.7554/eLife.02866.011](https://doi.org/10.7554/eLife.02866.011)

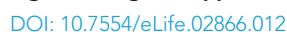

| Species                         | Annotation | Accession    |
|---------------------------------|------------|--------------|
| <i>Dictyostelium discoideum</i> | SecG       | XP_637214.1  |
| <i>Acanthamoeba castellanii</i> | SecG       | XP_004339446 |
| <i>Polysphondylium pallidum</i> | SecG       | EFA81640     |

**Figure 2—figure supplement 2.** Distribution of secG.

DOI: [10.7554/eLife.02866.013](https://doi.org/10.7554/eLife.02866.013)

| Species                          | Annotation | Accession                                             |
|----------------------------------|------------|-------------------------------------------------------|
| <i>Dictyostelium discoideum</i>  | Vacuolin A | XP_636194.1                                           |
|                                  | Vacuolin B | XP_641785.1                                           |
|                                  | Vacuolin C | XP_641784.1                                           |
| <i>Acanthamoeba castellanii</i>  | Vacuolin B | XP_004344121.1                                        |
|                                  | Vacuolin B | XP_004344100.1                                        |
| <i>Polysphondylium pallidum</i>  | Vacuolin A | EFA84974.1                                            |
|                                  | Vacuolin A | EFA82673.1                                            |
|                                  | Vacuolin A | EFA82573.1                                            |
|                                  | Vacuolin A | EFA78749.1                                            |
| <i>Bigelowiella natans</i>       | Vacuolin B | jgi Bigna1 86747 estExt_fgenes1_pg.C_130159           |
|                                  | Vacuolin B | jgi Bigna1 131962 aug1.16_g6670                       |
|                                  | Vacuolin B | jgi Bigna1 85415 estExt_fgenes1_pg.C_40040            |
|                                  | Vacuolin B | jgi Bigna1 64640 fgenes1_kg.81_#_12_#_4008_1_CFAO_EXT |
| <i>Bodo saltans</i>              | Vacuolin A | BS69240                                               |
|                                  | Vacuolin C | BS63415                                               |
|                                  | Vacuolin C | BS79800                                               |
| <i>Naegleria gruberi</i>         | Vacuolin A | jgi Naegr1 78343 estExt_fgenesNG_pg.C_50301           |
|                                  | Vacuolin A | jgi Naegr1 81131 estExt_fgenesNG_pg.C_510098          |
| <i>Thecamonas trahens</i>        | Vacuolin A | AMSG_01405T0                                          |
| <i>Chlamydomonas reinhardtii</i> | Vacuolin A | Cre06.g299550.t1.2                                    |
| <i>Dictyostelium purpureum</i>   | Vacuolin A | XP_003287744.1                                        |
|                                  | Vacuolin A | XP_003284594.1                                        |
| <i>Micromonas pusill</i>         | Vacuolin A | 56078 PACid:27347119                                  |
| <i>Trichomonas vaginalis</i>     | Vacuolin C | TVAG_115310                                           |
|                                  | Vacuolin A | TVAG_460920                                           |
|                                  | Vacuolin A | TVAG_302990                                           |
| <i>Tetrahymena thermophila</i>   | Vacuolin A | 3729.m00027                                           |
|                                  | Vacuolin B | 3729.m00022                                           |
|                                  | VacuolinB  | 3729.m00026                                           |

**Figure 2—figure supplement 3.** Distribution of vacuolins.

DOI: [10.7554/eLife.02866.014](https://doi.org/10.7554/eLife.02866.014)



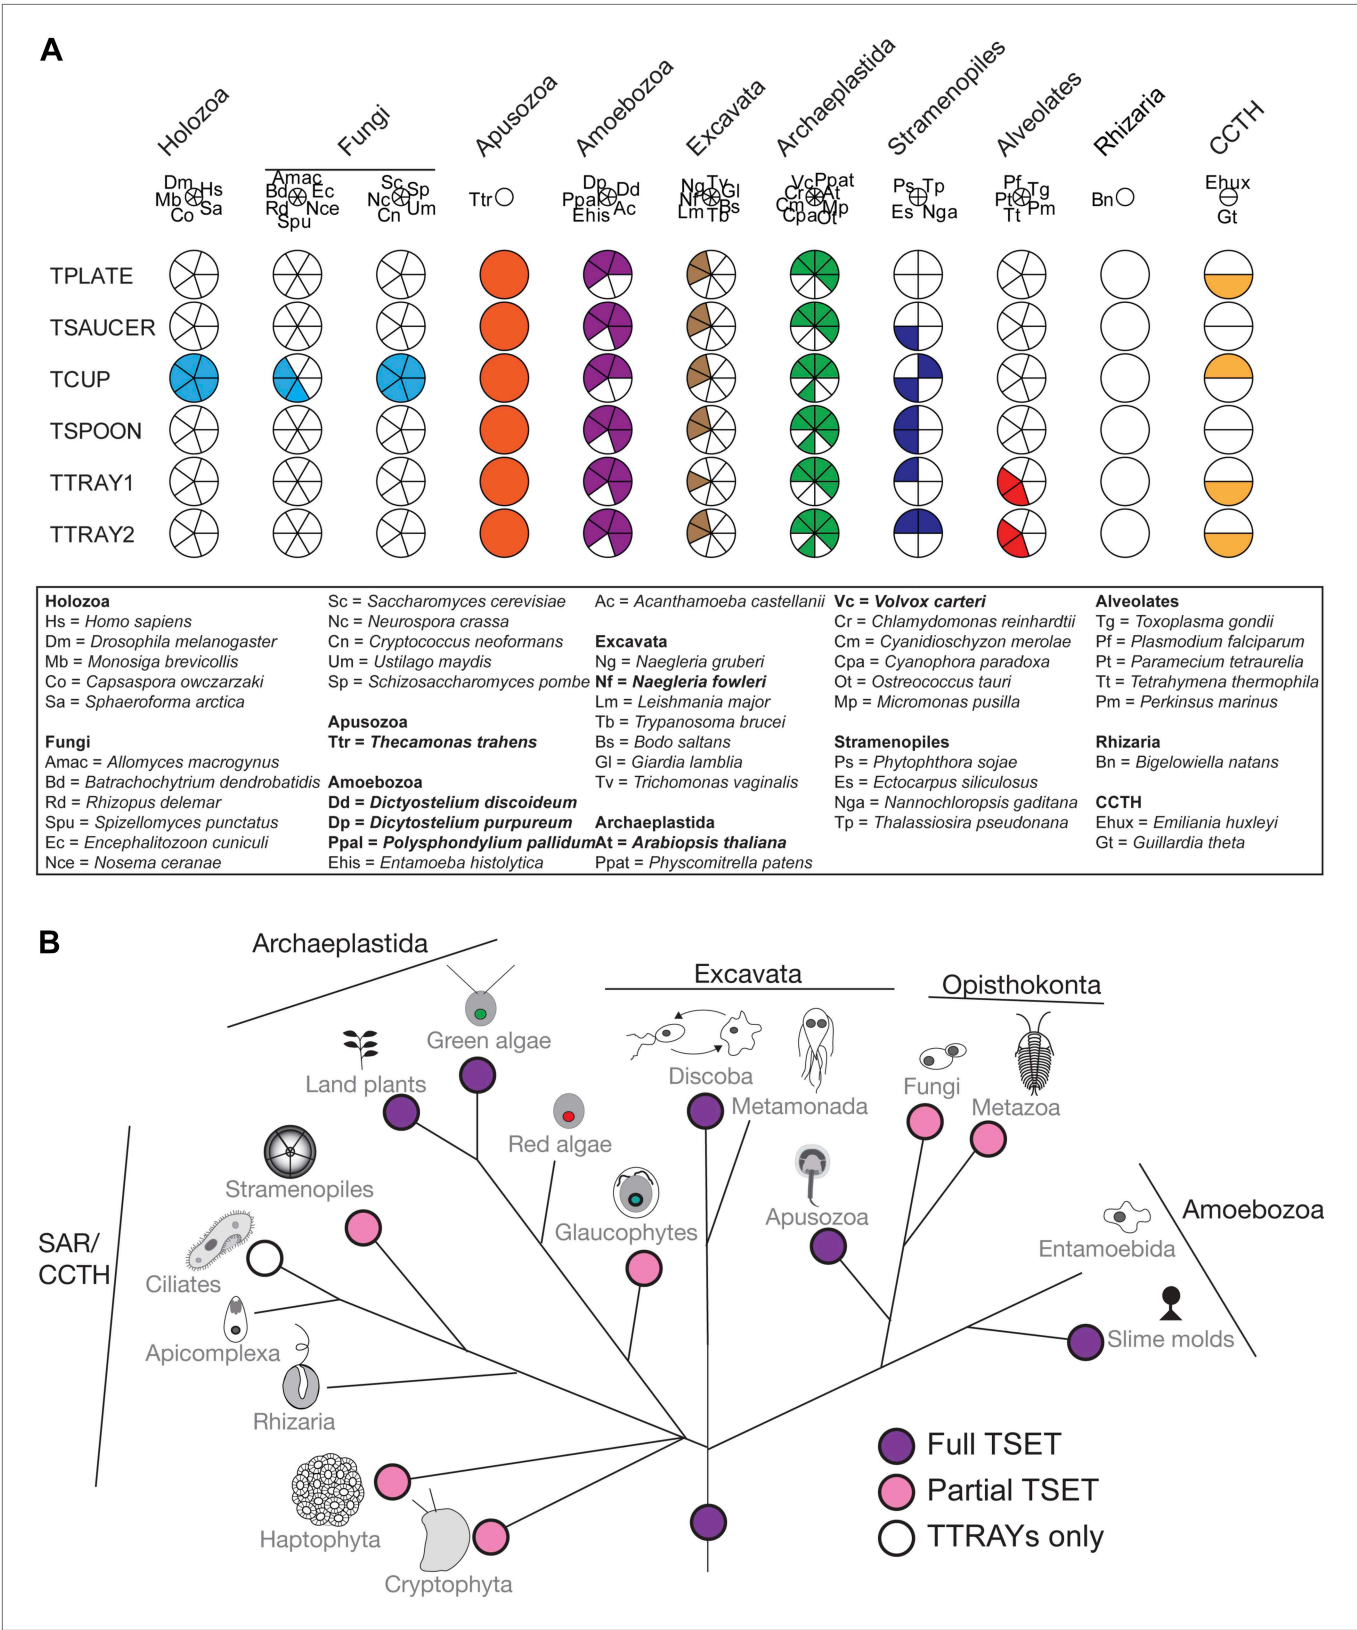

**Figure 3.** Distribution of TSET subunits. **(A)** Coulson plot showing the distribution of TSET in a diverse set of representative eukaryotes. Presence of the entire complex in at least four supergroups suggests its presence in the last eukaryotic common ancestor (LECA) with frequent secondary loss. Solid sectors indicate sequences identified and classified using BLAST and HMMer. Empty sectors indicate taxa in which no significant orthologues were identified. **(B)** Phylogenetic tree showing the distribution of TSET subunits across various eukaryotic supergroups. The tree is rooted at the base and branches out to show the relationships between different groups. The groups are color-coded: purple for Full TSET, pink for Partial TSET, and white for TTRAYs only. The groups include Archaeplastida, Excavata, Opisthokonta, SAR/CCTH, and Amoebozoa. The SAR/CCTH group includes Green algae, Land plants, Red algae, Glaucophytes, Stramenopiles, Ciliates, Apicomplexa, Rhizaria, Haptophyta, and Cryptophyta. The Excavata group includes Discoba, Metamonada, and Apusozoa. The Opisthokonta group includes Fungi, Metazoa, and Amoebozoa. The Amoebozoa group includes Entamoebida and Slime molds.



Figure 3. Continued

identified. Filled sectors in the Holozoa and Fungi represent F-BAR domain-containing FCHo and Syp1, respectively. Taxon name abbreviations are inset. Names in bold indicate taxa with all six components. **(B)** Deduced evolutionary history of TSET as present in the LECA but independently lost multiple times, either partially or completely. See also **Figure 3—source data 1**, **Figure 3—figure supplement 1**.

DOI: [10.7554/eLife.02866.017](https://doi.org/10.7554/eLife.02866.017)

| Figure        | Dataset    | Method     | Model         | Number of characters | Number of Taxa |
|---------------|------------|------------|---------------|----------------------|----------------|
| Concatenation | Concat.R6  | MrBayes    | mixed + gamma | 1466                 | 112            |
|               |            | PhyloBayes | LG+CAT        | 1466                 | 112            |
|               |            | PhyML      | LG+I+G+F      | 1466                 | 112            |
|               |            | RAxML      | LG+CAT+F      | 1466                 | 112            |
| TPLATE_WC     | TPLATE.R2  | MrBayes    | mixed + gamma | 560                  | 121            |
|               |            | RAxML      | LG+CAT+F      | 560                  | 121            |
| TPLATE_WOC    | TPLATE.R4  | MrBayes    | mixed + gamma | 402                  | 91             |
|               |            | RAxML      | LG+CAT+F      | 402                  | 91             |
| TSAUCER_WC    | TSAUCER.R2 | MrBayes    | mixed + gamma | 562                  | 154            |
|               |            | RAxML      | LG+CAT+F      | 562                  | 154            |
| TSAUCER_WOC   | TSAUCER.R4 | MrBayes    | mixed + gamma | 284                  | 123            |
|               |            | RAxML      | LG+CAT+F      | 284                  | 123            |
| TCUP_WC       | TCUP.R2    | MrBayes    | mixed + gamma | 379                  | 159            |
|               |            | RAxML      | LG+CAT+F      | 379                  | 159            |
| TCUP_WOC      | TCUP.R4    | MrBayes    | mixed + gamma | 187                  | 133            |
|               |            | RAxML      | LG+CAT+F      | 187                  | 133            |
| TSPOON_WC     | TSPOON.R2  | MrBayes    | mixed + gamma | 141                  | 139            |
|               |            | RAxML      | LG+CAT+F      | 141                  | 139            |
| TTRAY         | TTRAY.R4   | MrBayes    | mixed + gamma | 437                  | 60             |
|               |            | RAxML      | LG+CAT+F      | 437                  | 60             |

**Figure 3—figure supplement 1.** Models used for phylogenetic analyses.

DOI: [10.7554/eLife.02866.019](https://doi.org/10.7554/eLife.02866.019)

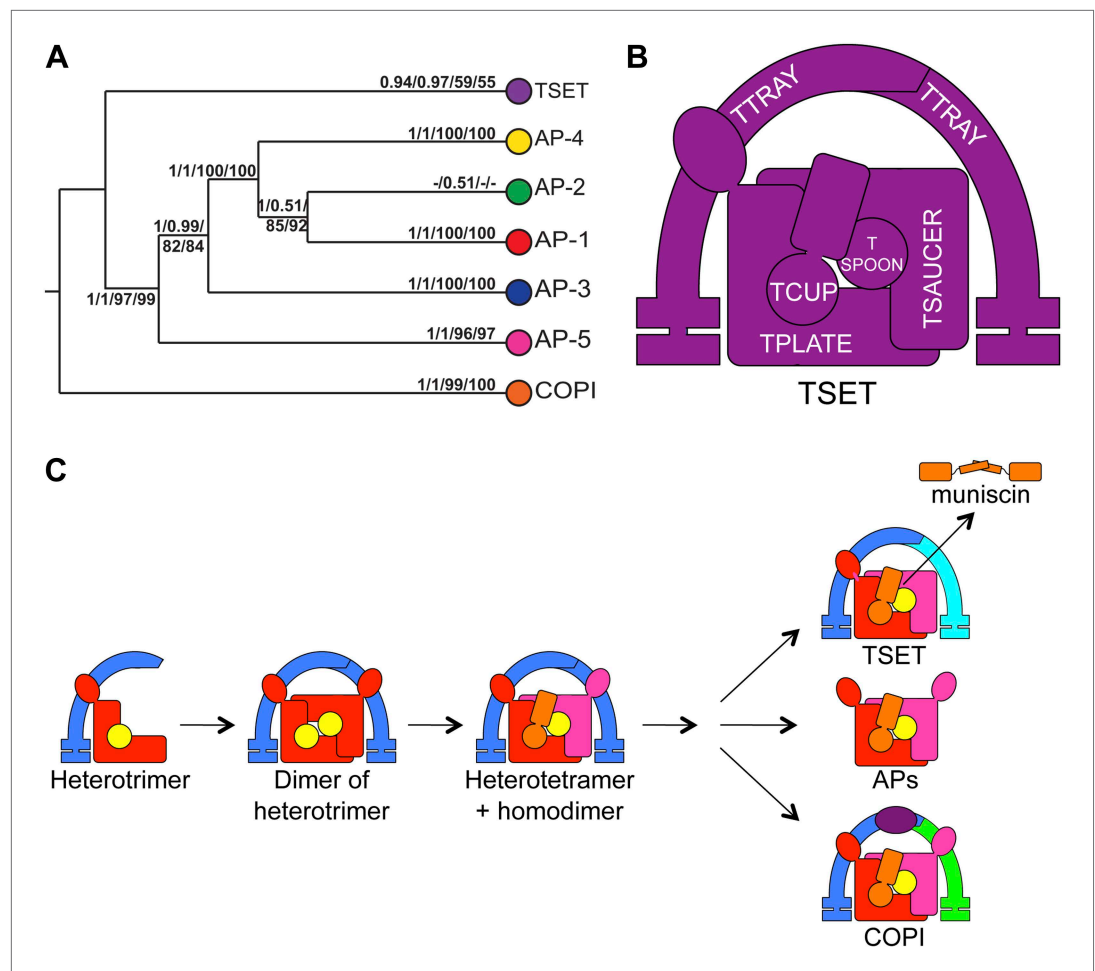

**Figure 4.** Evolution of TSET. **(A)** Simplified diagram of the concatenated tree for TSET, APs, and COPI, based on **Figure 4—figure supplement 8**. Numbers indicate posterior probabilities for MrBayes and PhyloBayes and maximum-likelihood bootstrap values for PhyML and RAxML, in that order. **(B)** Schematic diagram of TSET. **(C)** Possible evolution of the three families of heterotetramers: TSET, APs, and COPI. We propose that the earliest ancestral complex was a likely a heterotrimer or a heterohexamer formed from two identical heterotrimers, containing large (red), small (yellow), and scaffolding (blue) subunits. All three of these proteins were composed of known ancient building blocks of the membrane-trafficking system (Vedovato et al., 2009):  $\alpha$ -solenoid domains in both the large and scaffolding subunits; two  $\beta$ -propellers in the scaffolding subunit; and a longin domain forming the small subunit. The gene encoding the large subunit then duplicated and mutated to generate the two distinct types of large subunits (red and magenta), and the gene encoding the small subunit also duplicated and mutated (yellow and orange), with one of the two proteins (orange) acquiring a  $\mu$  homology domain (MHD) to form the ancestral heterotetramer, as proposed by Boehm and Bonifacio (12). However, the scaffolding subunit remained a homodimer. Upon diversification into three separate families, the scaffolding subunit duplicated independently in TSET and COPI, giving rise to TTRAY1 and TTRAY2 in TSET, and to  $\alpha$ - and  $\beta$ -COP in COPI. COPI also acquired a new subunit,  $\epsilon$ -COP (purple). The scaffolding subunit may have been lost in the ancestral AP complex, as indicated in the diagram; however, AP-5 is tightly associated with two other proteins, SPG11 and SPG15, and the relationship of SPG11 and SPG15 to TTRAY/B-COP remains unresolved, so it is possible that SPG11 and SPG15 are highly divergent descendants of the original scaffolding subunits. The other AP complexes are free heterotetramers when in the cytosol, but membrane-associated AP-1 and AP-2 interact with another scaffold, clathrin; and AP-3 has also been proposed to interact transiently with a protein with similar architecture, Vps41 (Rehling et al., 1999; Cabrera et al., 2010; Asensio et al., 2013). So far no scaffold has been proposed for AP-4. Although the order of emergence of TSET and COP relative to adaptins is unresolved, our most recent analyses indicate that, contrary to previous reports (Hirst et al., 2011), AP-5 diverged basally within the adaptin clade, followed by AP-3, AP-4, and APs 1 and 2, all prior to the LECA. This still suggests a primordial bridging of the secretory and phagocytic systems prior to emergence of a *trans*-Golgi Figure 4. Continued on next page

*Figure 4. Continued*

network. The muniscins arose much later, in ancestral opisthokonts, from a translocation of the TSET MHD-encoding sequence to a position immediately downstream from an F-BAR domain-encoding sequence. Another translocation occurred in plants, where an SH3 domain-coding sequence was inserted at the 3' end of the TSAUCER-coding sequence. See also **Figure 4—figure supplements 1–10**.

DOI: [10.7554/eLife.02866.020](https://doi.org/10.7554/eLife.02866.020)

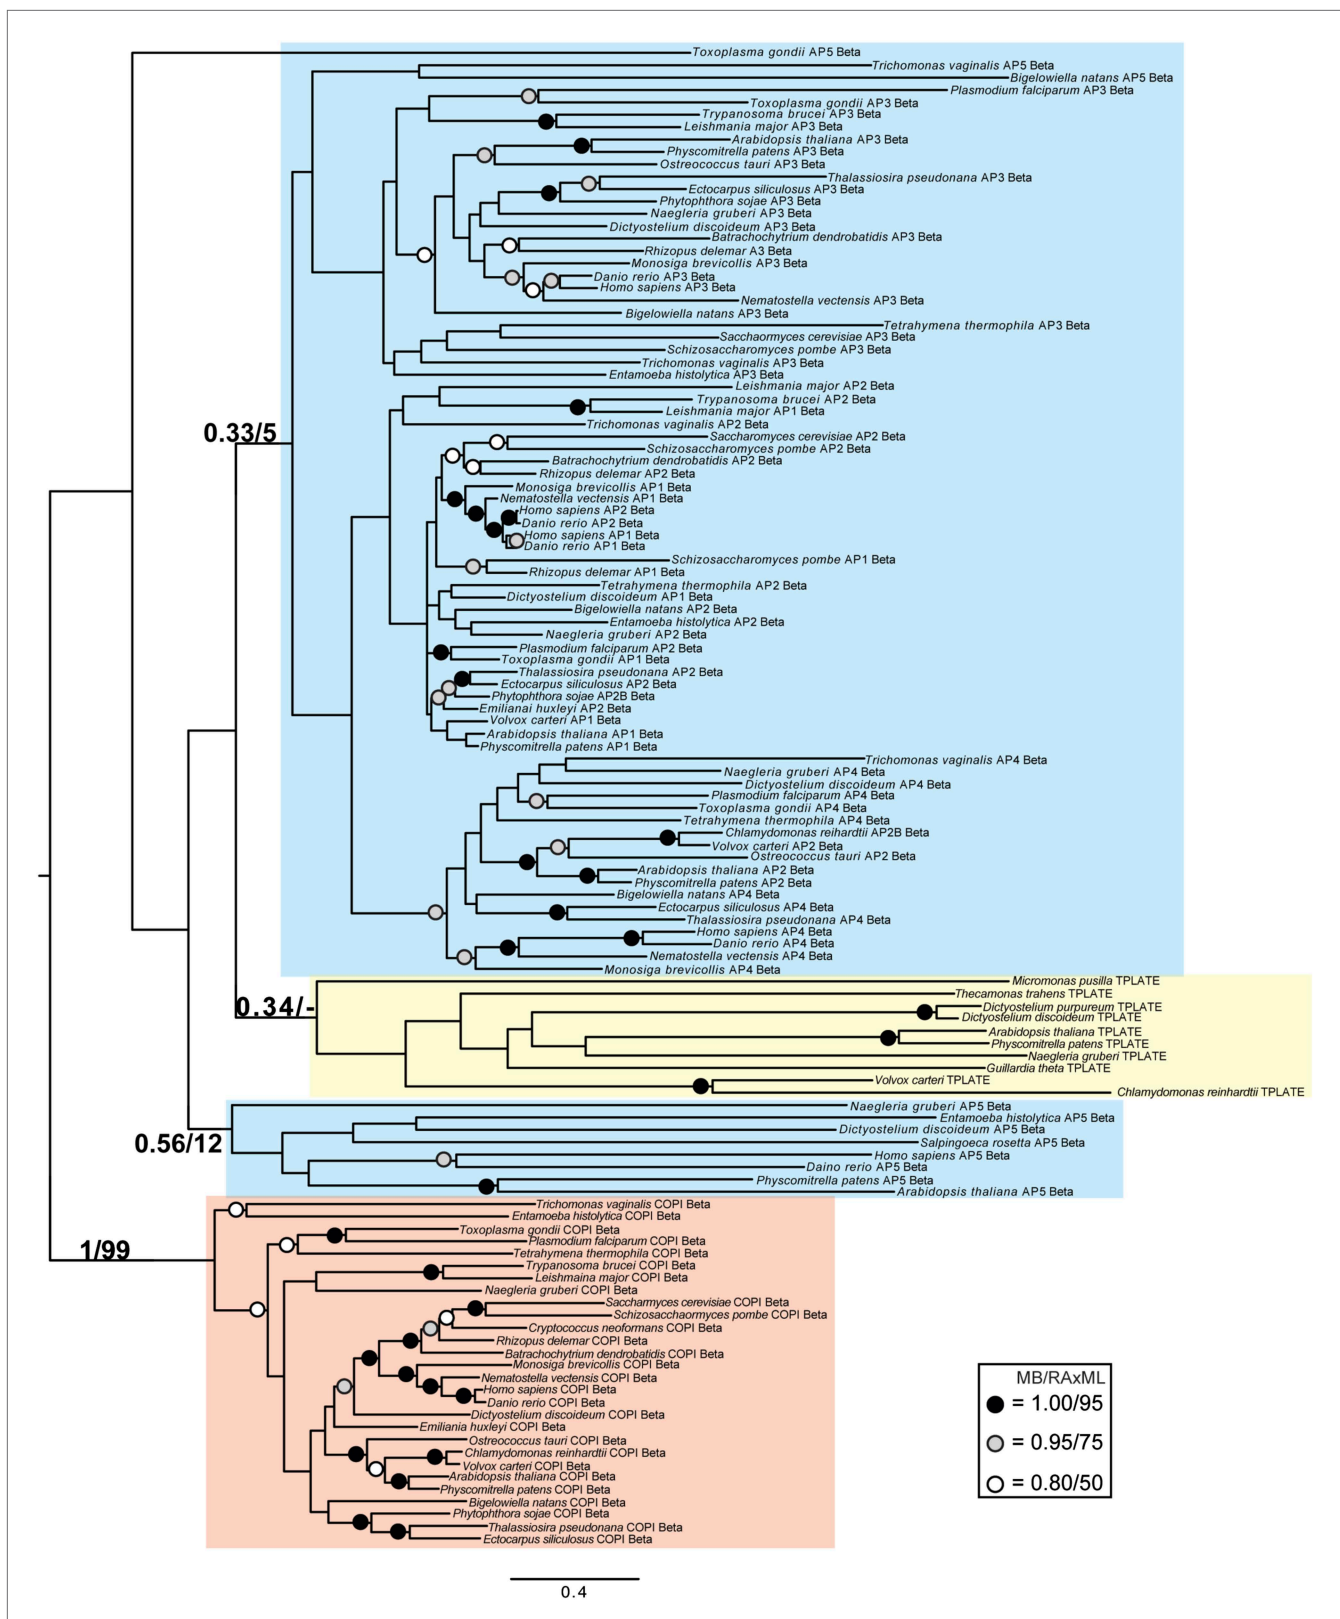

**Figure 4—figure supplement 1.** Phylogenetic analysis of TPLATE,  $\beta$ -COP, and  $\beta$ -adaptin, with TPLATE robustly excluded from the  $\beta$ -COP clade.

DOI: 10.7554/eLife.02866.021

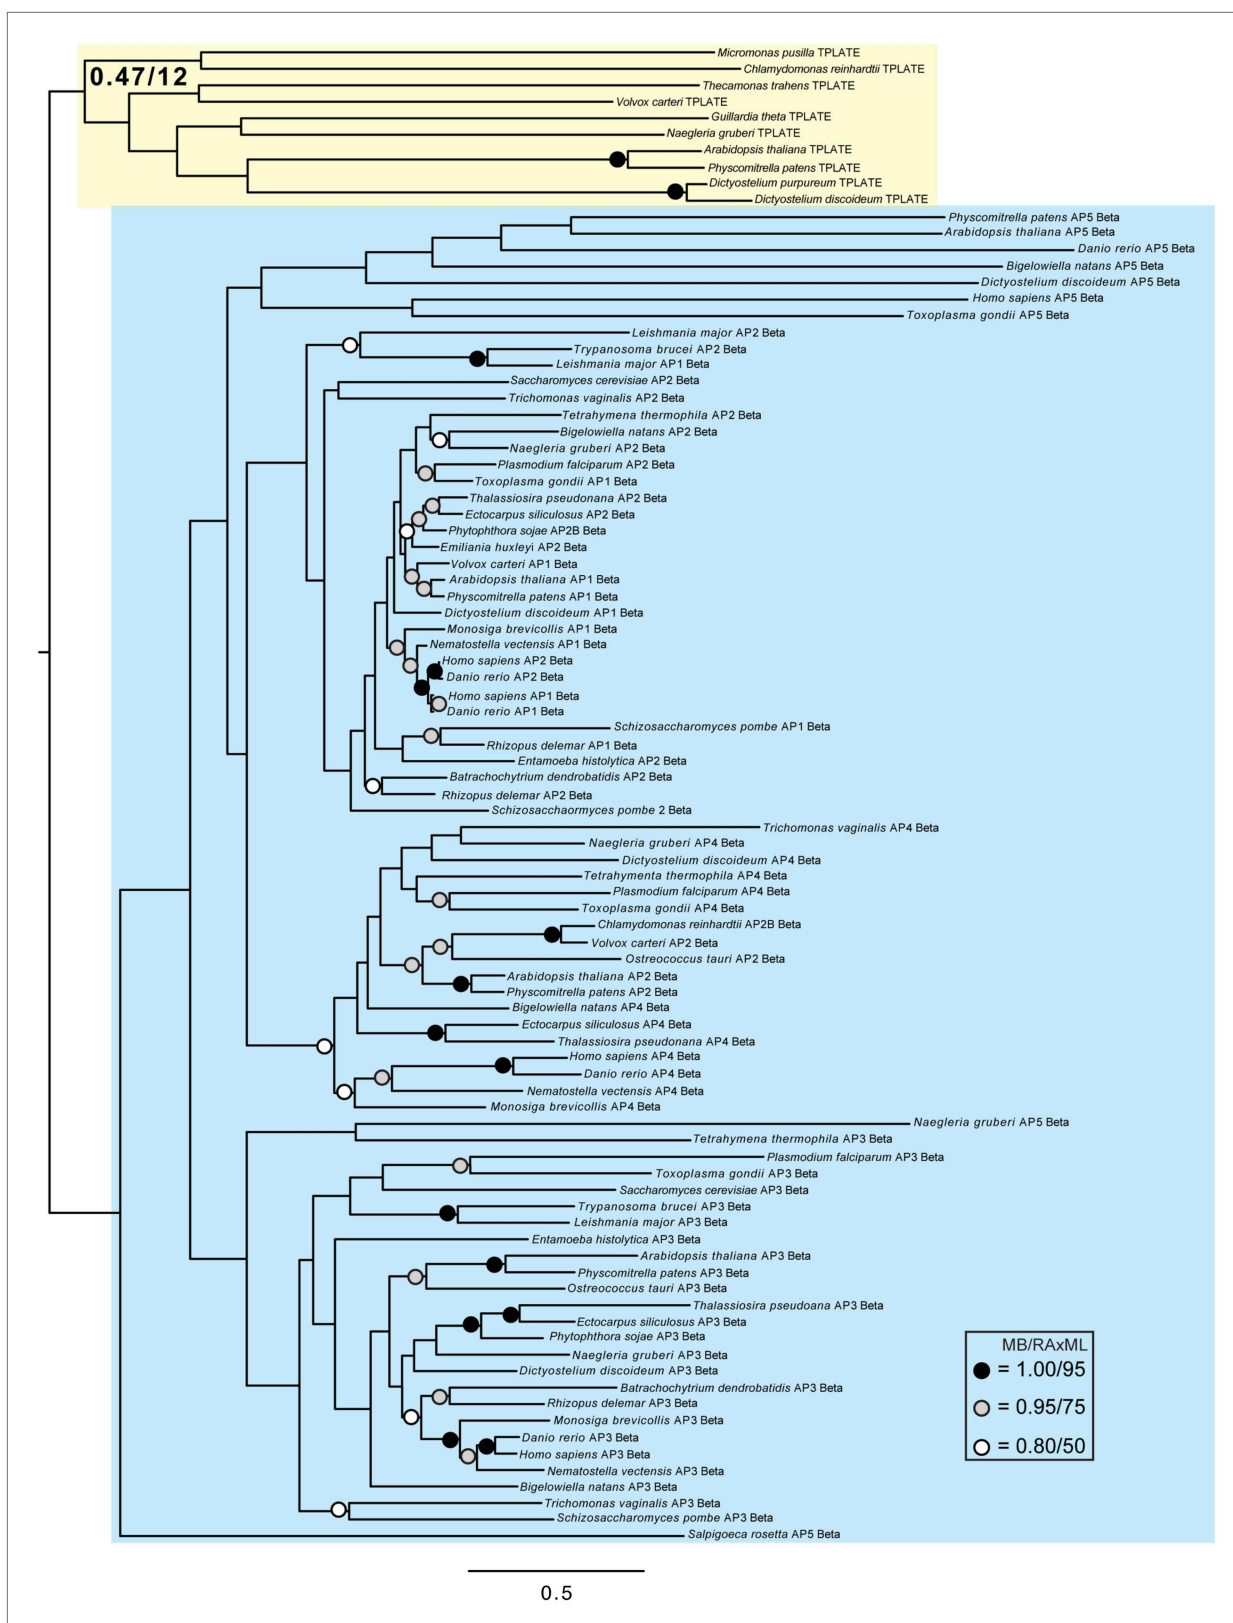

**Figure 4—figure supplement 2.** Phylogenetic analysis of TPLATE and  $\beta$ -adaptin subunits ( $\beta$ -COP removed) showing, with weak support, that TPLATE is excluded from the adaptin clade.

DOI: [10.7554/eLife.02866.022](https://doi.org/10.7554/eLife.02866.022)

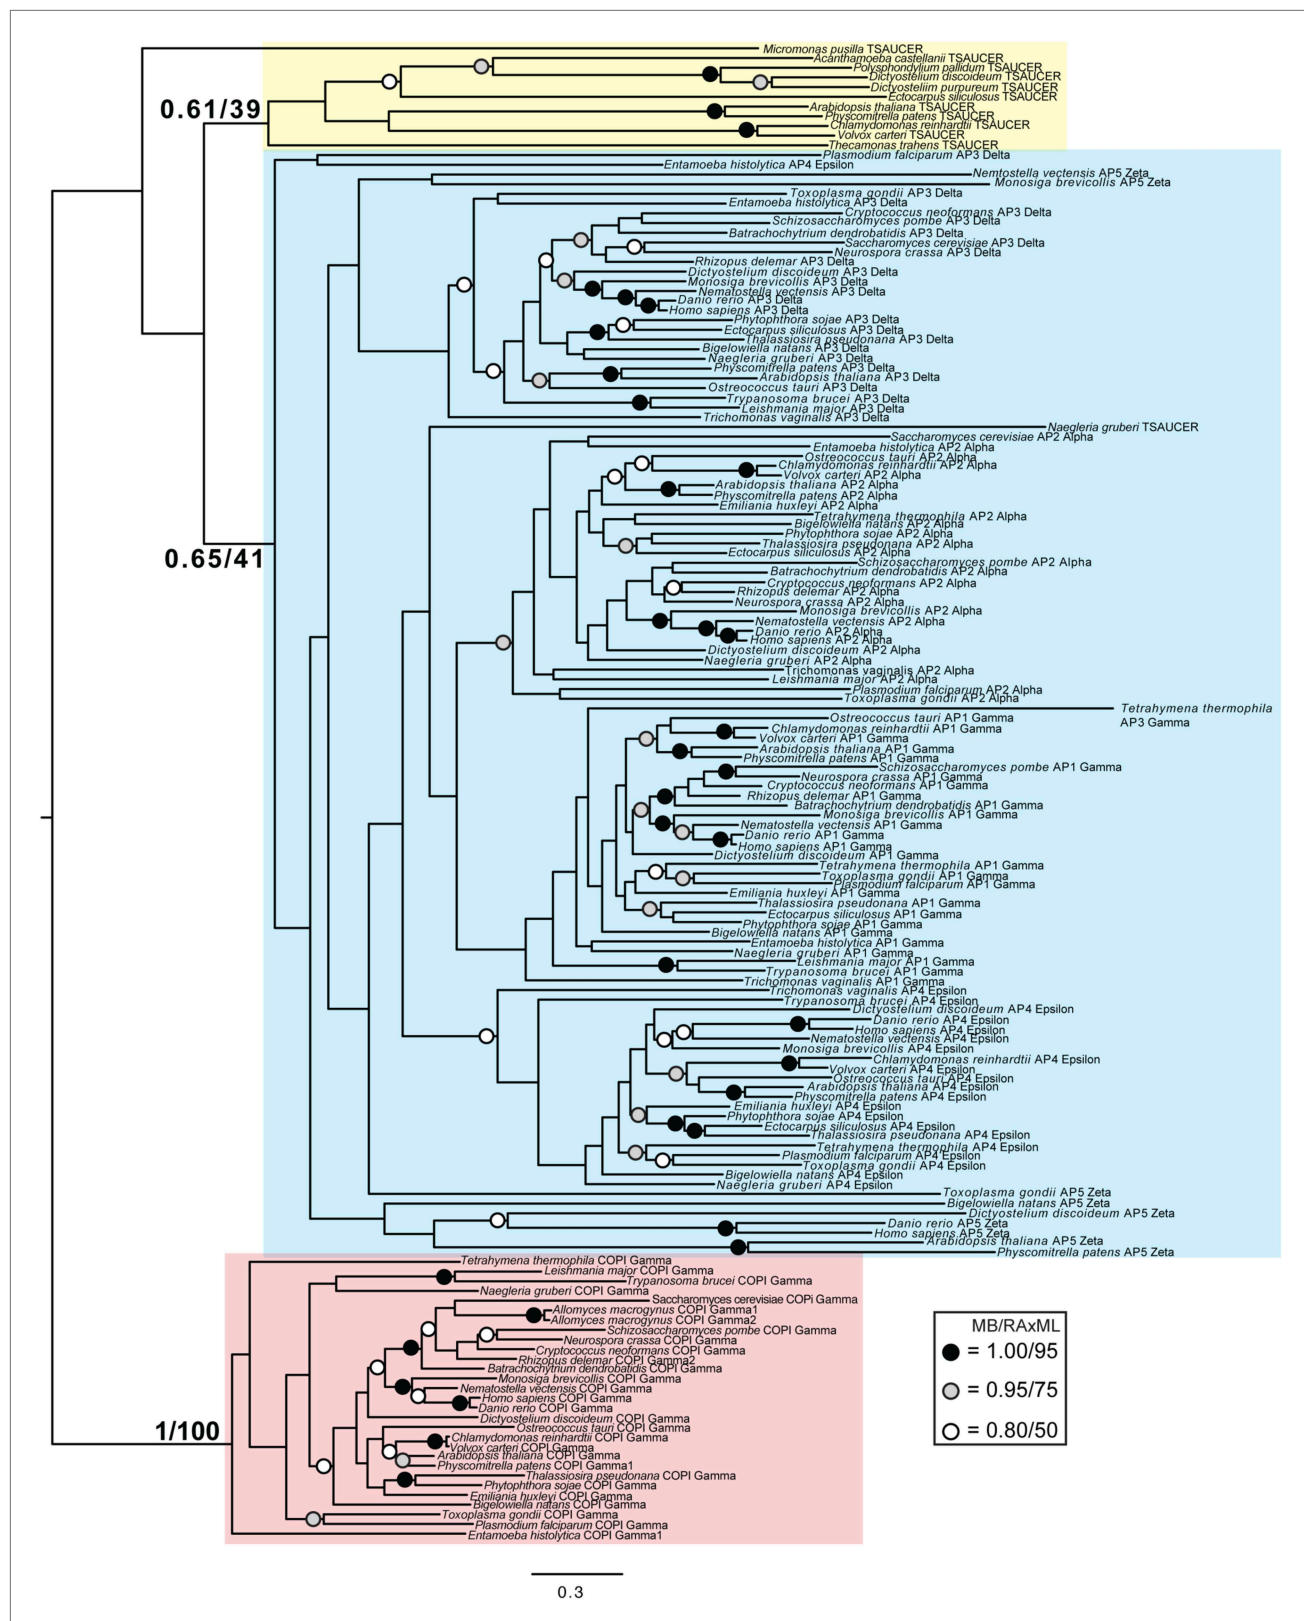

**Figure 4—figure supplement 3.** Phylogenetic analysis of TSAUCER,  $\gamma$ -COP, and  $\gamma\delta\epsilon\zeta$ -adaptin subunits, with TCUP robustly excluded from the  $\gamma$ -COP clade, and weakly excluded from the adaptin clade.

DOI: [10.7554/eLife.02866.023](https://doi.org/10.7554/eLife.02866.023)



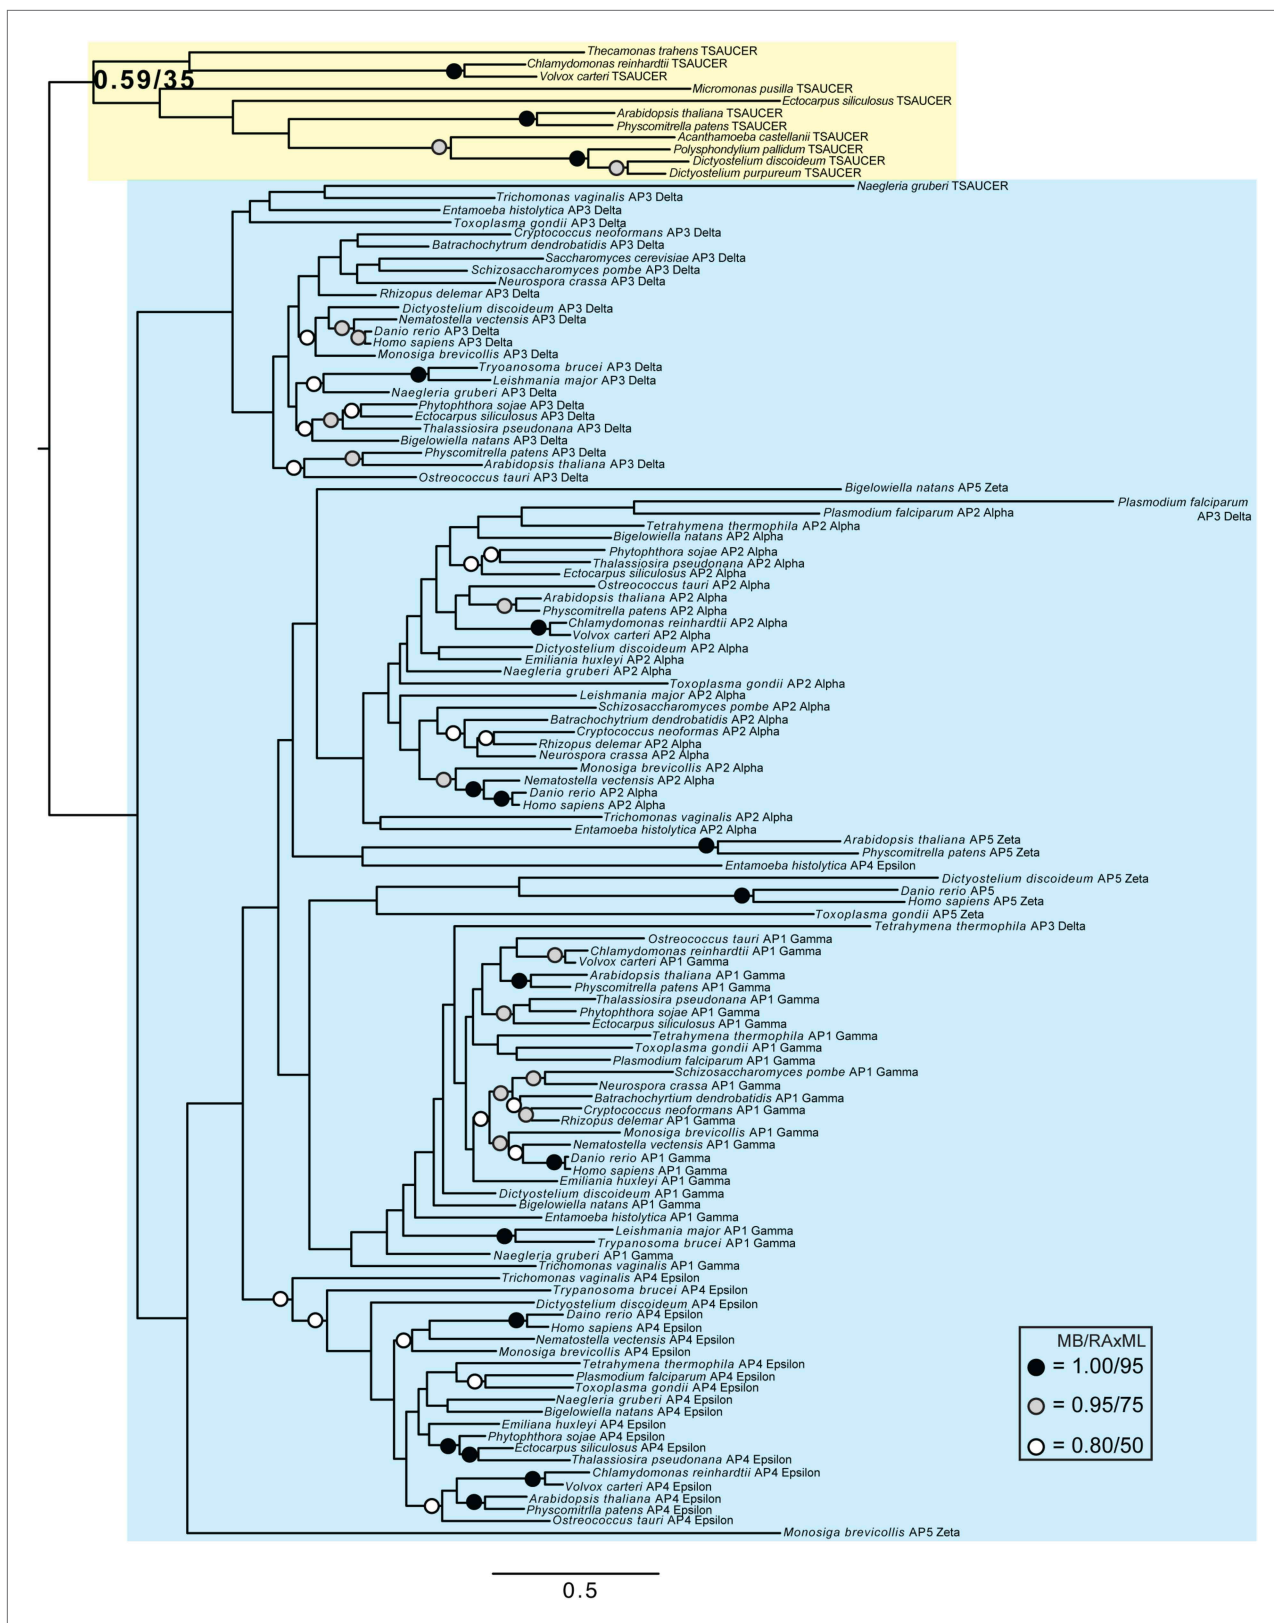

**Figure 4—figure supplement 4.** Phylogenetic analysis of TSAUCER and  $\gamma\alpha\delta\epsilon\zeta$ -adaptin subunits ( $\gamma$ -COP removed), showing weak support for the exclusion of TSAUCER from the adaptin clade.

DOI: [10.7554/eLife.02866.024](https://doi.org/10.7554/eLife.02866.024)

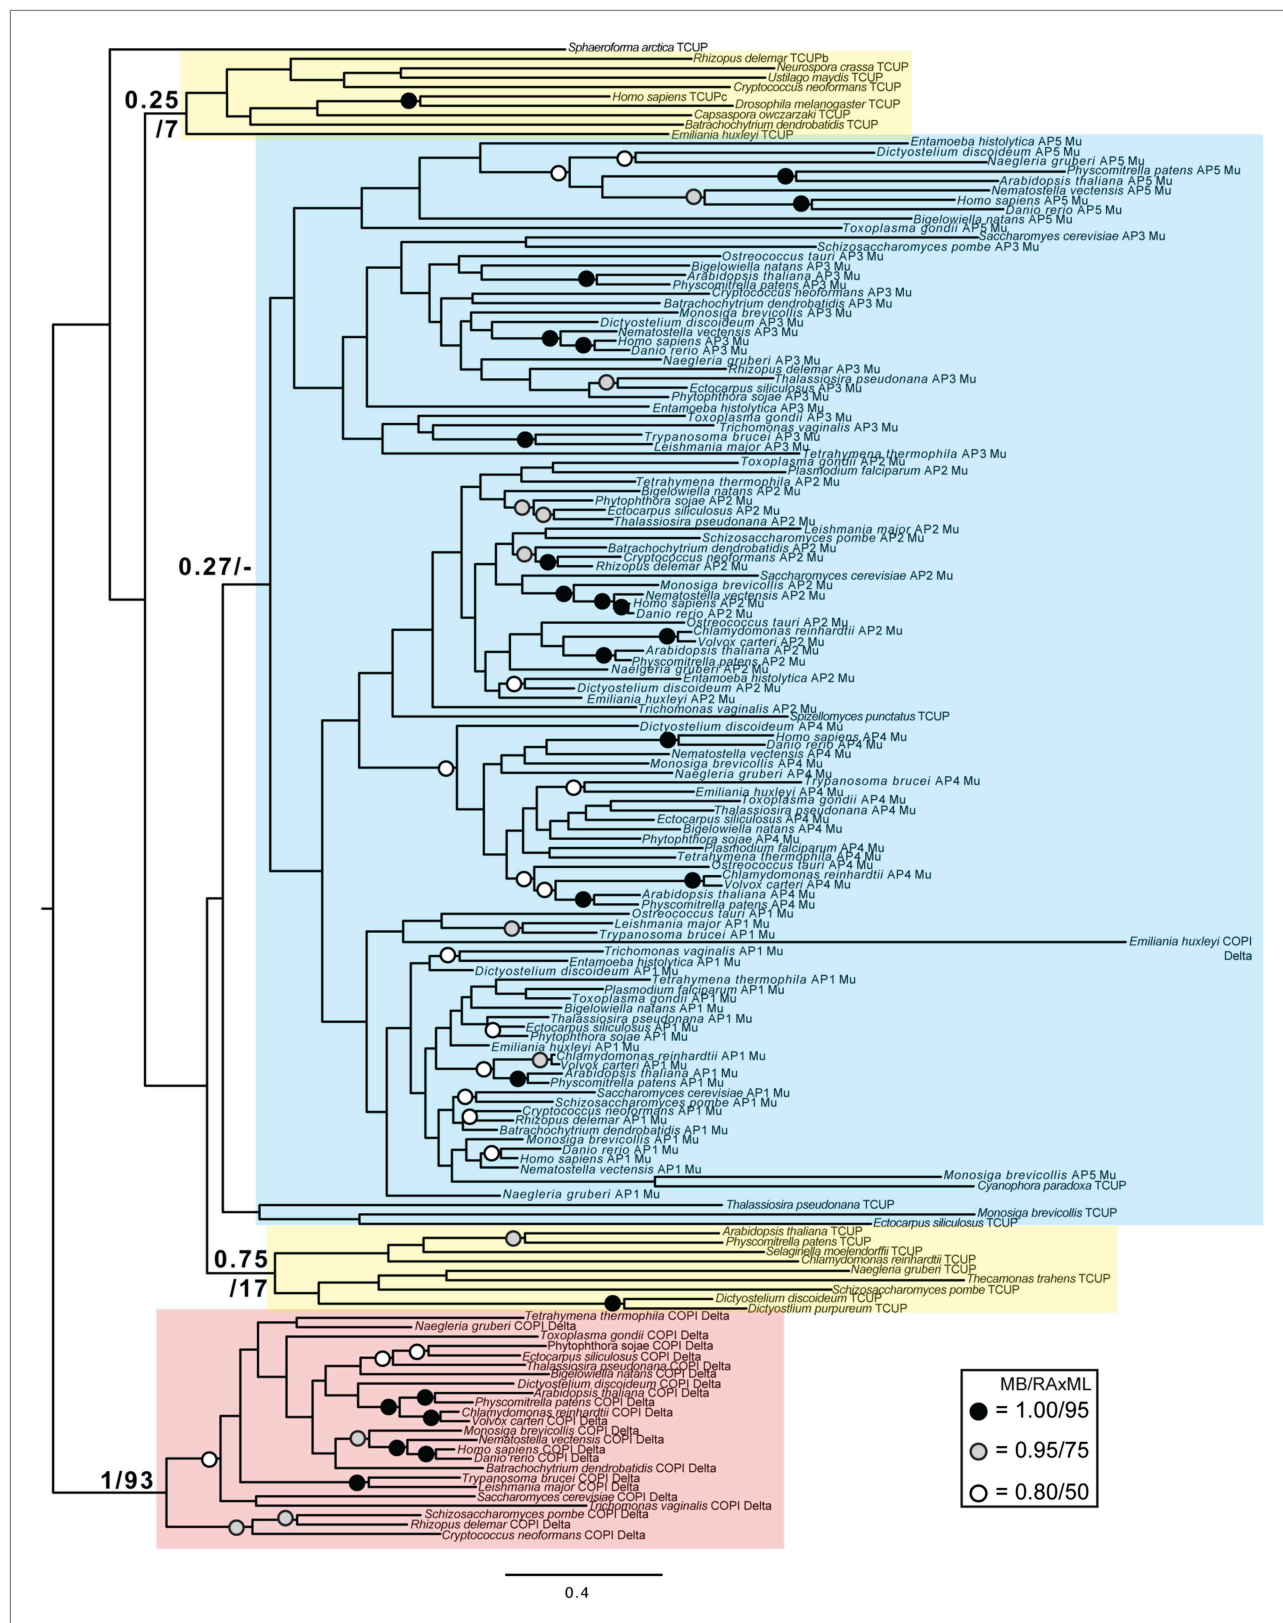

**Figure 4—figure supplement 5.** Phylogenetic analysis of TCUP,  $\delta$ -COP, and  $\mu$ -adaptin subunits, with TSAUCER robustly excluded from the  $\delta$ -COP clade and weakly excluded from the adaptin clade.

DOI: 10.7554/eLife.02866.025



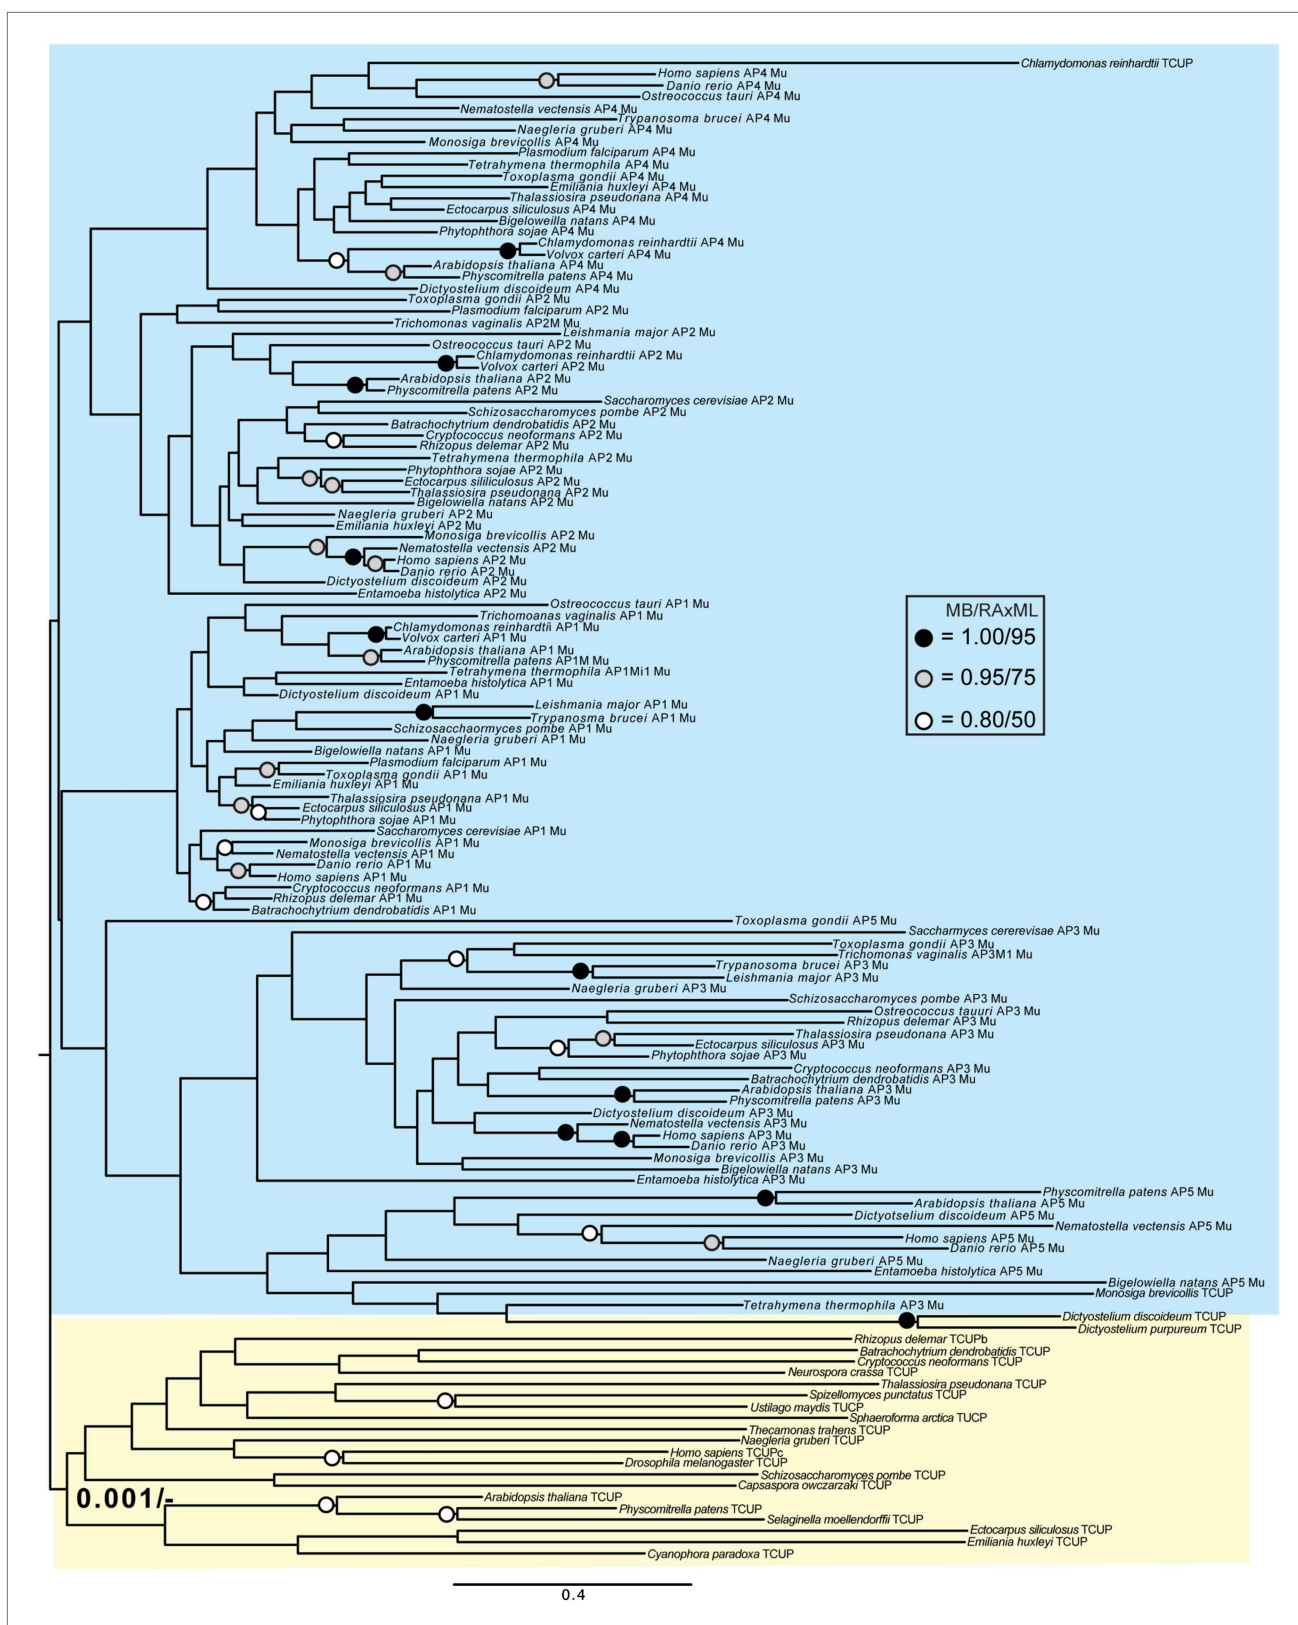

**Figure 4—figure supplement 6.** Phylogenetic analysis of TCUP and  $\mu$ -adaplin subunits ( $\delta$ -COP removed), showing weak support for the exclusion of TCUP from the adaplin clade.

DOI: [10.7554/eLife.02866.026](https://doi.org/10.7554/eLife.02866.026)

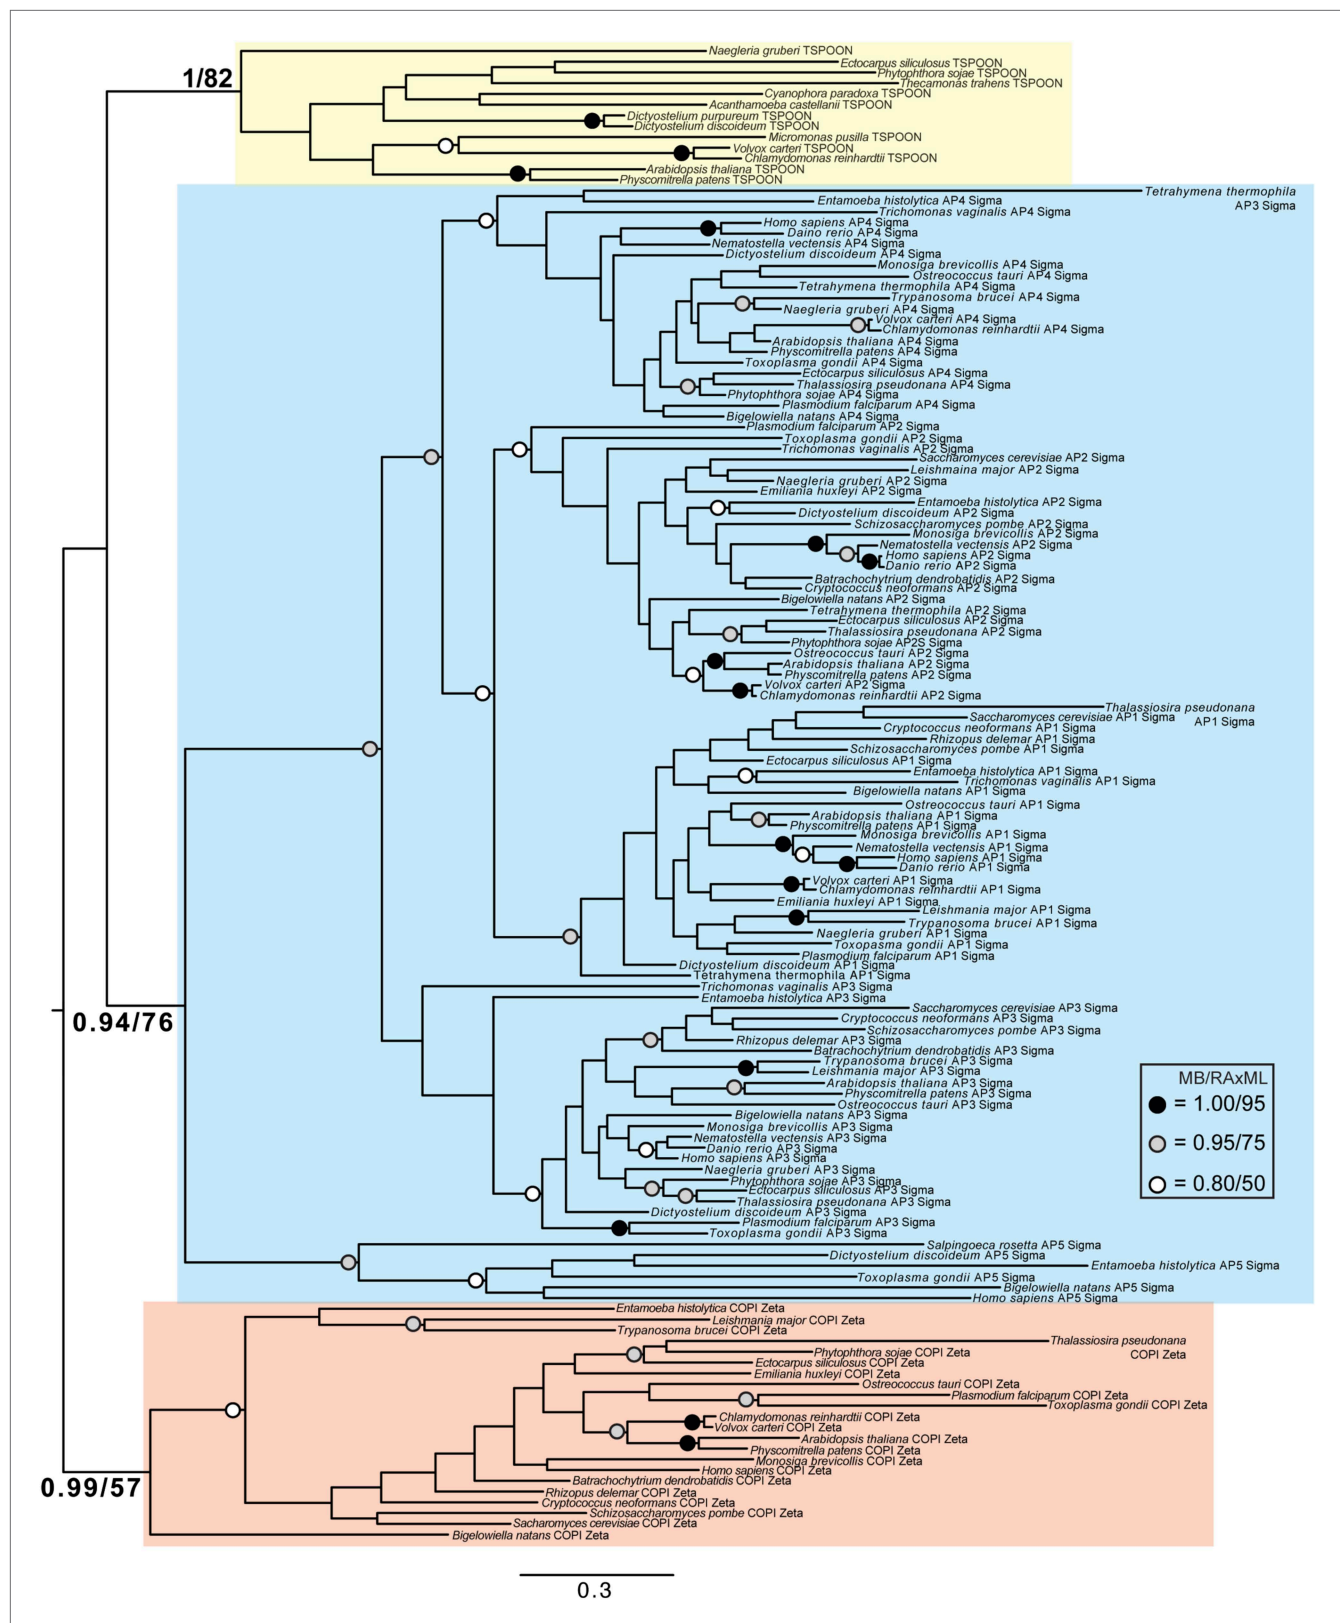

**Figure 4—figure supplement 7.** Phylogenetic analysis of TSPOON with  $\zeta$ -COP and  $\sigma$ -adaptin subunits with moderate support for the exclusion of TSPOON from both the COP1 and adaptin clades, in addition to moderate support for the monophyly of the TSPOON clade.

DOI: [10.7554/eLife.02866.027](https://doi.org/10.7554/eLife.02866.027)

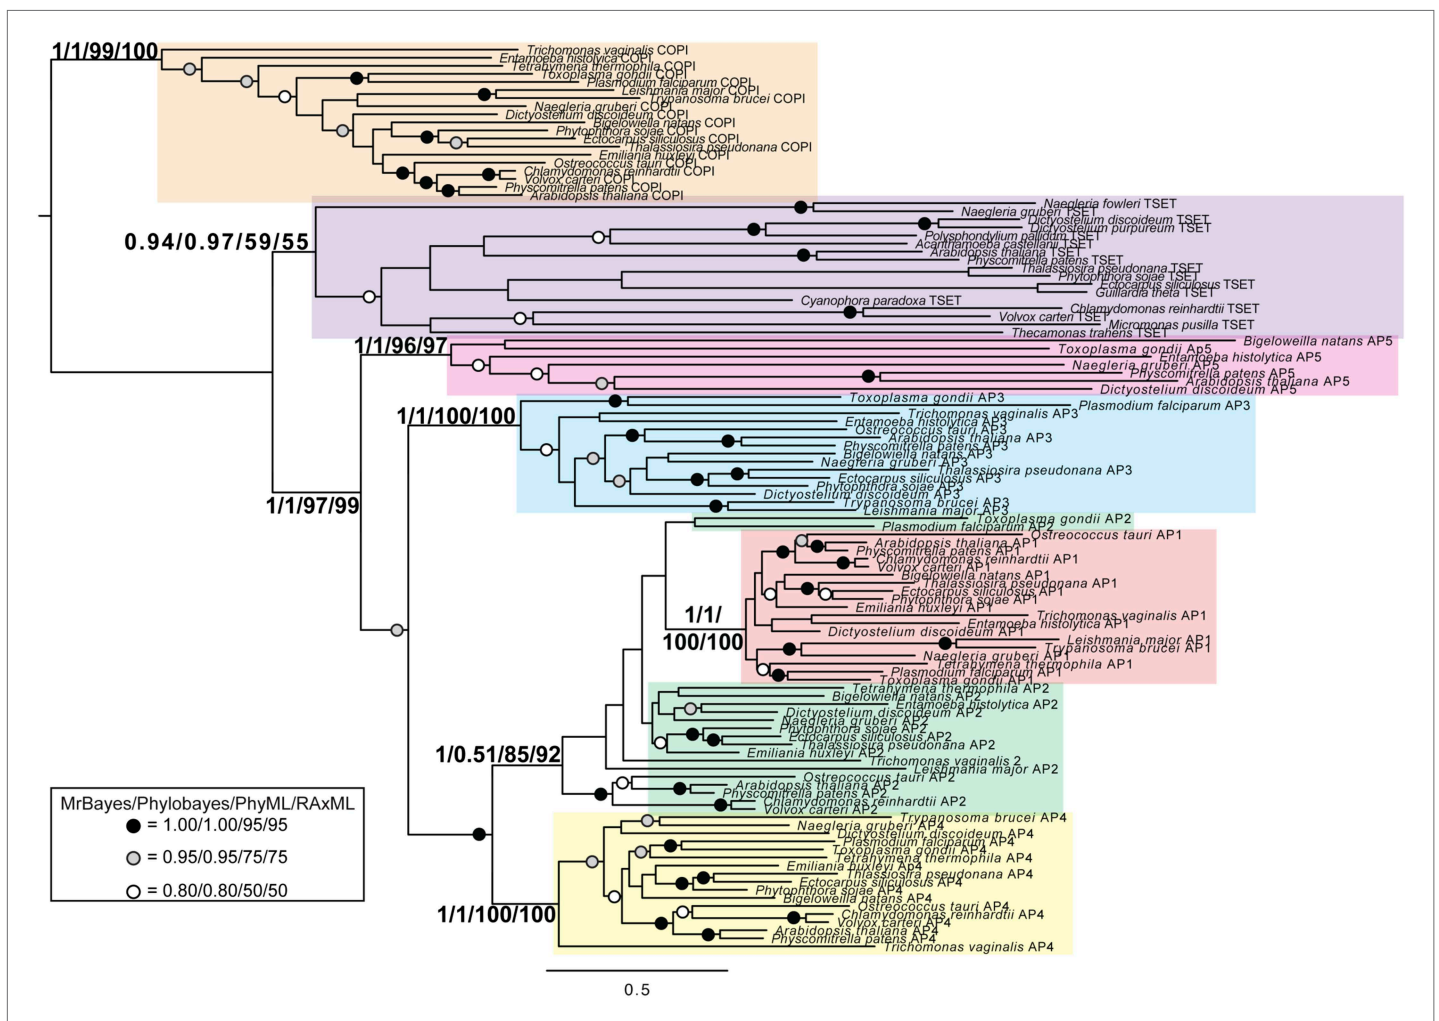

**Figure 4—figure supplement 8.** TSET is a phylogenetically distinct lineage from F-COPI and the AP complexes.

DOI: [10.7554/eLife.02866.028](https://doi.org/10.7554/eLife.02866.028)

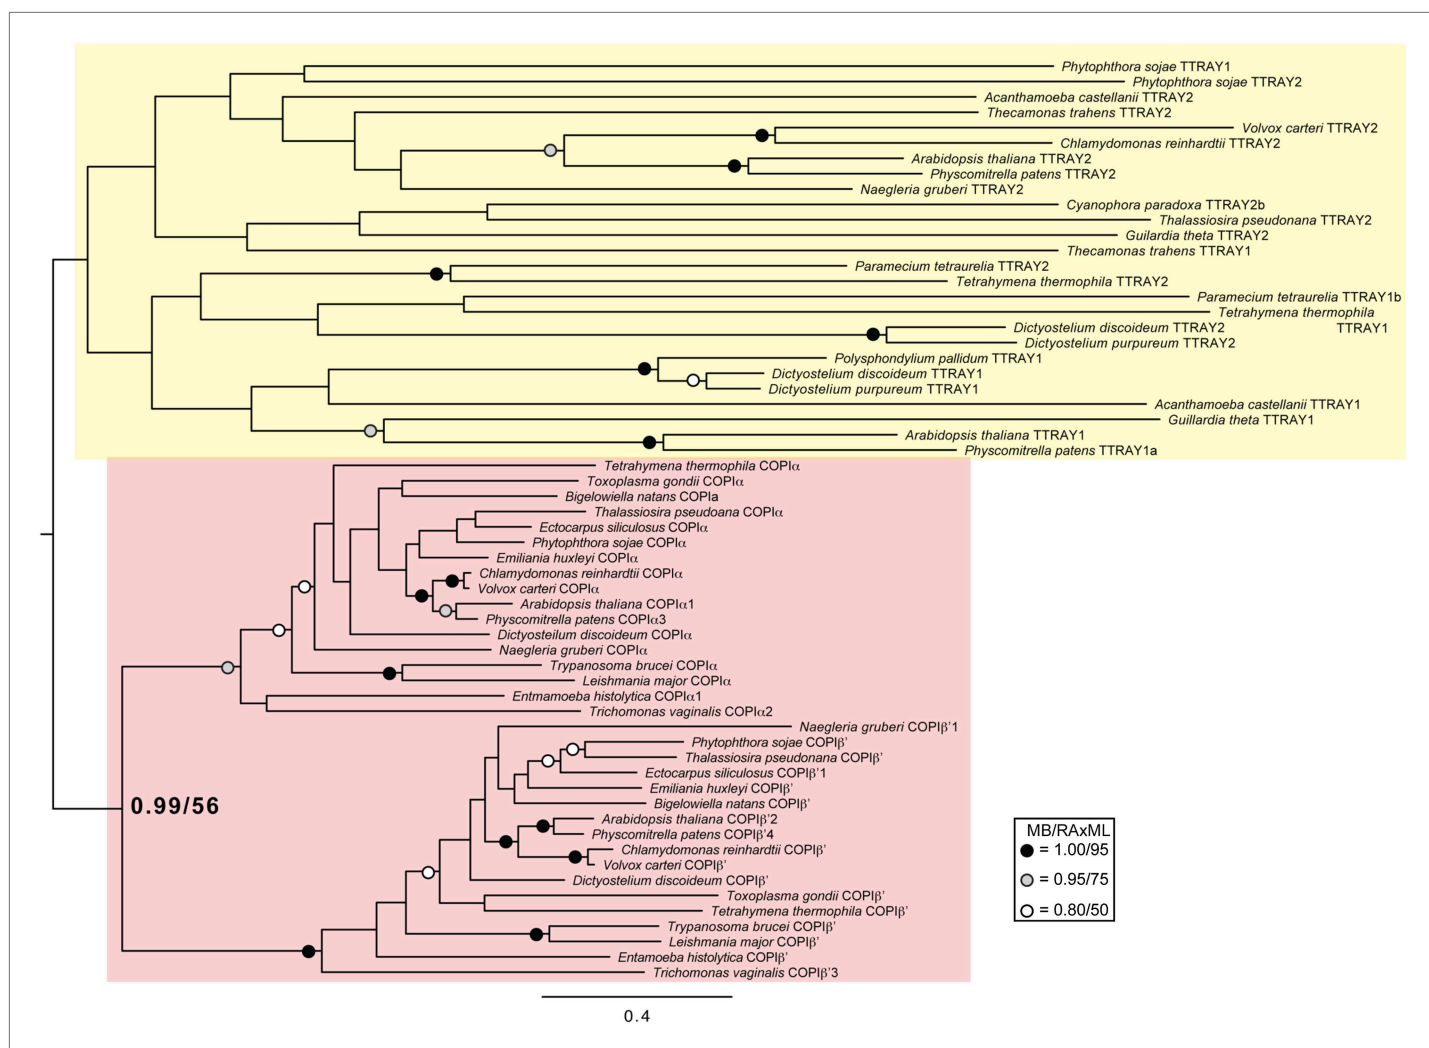

**Figure 4—figure supplement 9.** Phylogenetic analysis of TTRAY1, TTRAY2,  $\alpha$ -COP, and  $\beta'$ -COP.

DOI: [10.7554/eLife.02866.029](https://doi.org/10.7554/eLife.02866.029)

|                                  |                                                                                                                                                                           |
|----------------------------------|---------------------------------------------------------------------------------------------------------------------------------------------------------------------------|
| <i>Homo sapiens</i>              | NP_001139504.1 (FCHO2)<br>NP_001154829.1 (FCHO1)<br>NP_001154830.1 (FCHO1)<br>NP_055937.1 (FCHO1)<br>NP_620137.2 (FCHO2)<br>NP_001154831.1 (FCHO1)<br>NP_115667.2 (SGIP1) |
| <i>Saccharomyces cerevisiae</i>  | NP_009959.2 (Syp1p)                                                                                                                                                       |
| <i>Schizosaccharomyces pombe</i> | NP_596299.1 (Syp1)                                                                                                                                                        |
| <i>Drosophila melanogaster</i>   | NP_001097723.1 (CG8176)<br>NP_001097724.1 (CG8176)<br>NP_788612.1 (CG8176)<br>NP_788613.1 (CG8176)                                                                        |
| <i>Caenorhabditis elegans</i>    | NP_493947.1 (hypothetical protein F56D12.6)<br>NP_493948.1 (hypothetical protein F56D12.6)                                                                                |

**Figure 4—figure supplement 10.** Muniscin family members identified by reverse HHpred, using the following PDB structures.

DOI: [10.7554/eLife.02866.030](https://doi.org/10.7554/eLife.02866.030)
